# Supplementary material for: Eco-friendly α,β-C(sp3)–H difunctionalization of tertiary amines via sequential [1,5]-hydride transfer and hetero-Diels–Alder cyclization
Source: Royal Society of Chemistry journal article supplement (doi:10.1039/d4cc02858a), 2024-01-01

## Supporting Information

### **Eco-Friendly $\alpha,\beta$ -C(sp<sup>3</sup>)-H Difunctionalization of Tertiary Amines via Sequential [1,5]-Hydride Transfer and Hetero-Diels-Alder Cyclization**

Yi Zhang<sup>a,b</sup>, Huihui Yan<sup>c</sup>, Peng Zhao<sup>a\*</sup>, Renen Chen,<sup>a</sup> Weiwei Fang<sup>b\*</sup>, Lei Wang<sup>a,d</sup>, Yongmin Ma<sup>a\*</sup>

<sup>a</sup>Institute of Advanced Studies and School of Pharmaceutical and Chemical Engineering, Taizhou University, Taizhou 318000, P R China

<sup>b</sup>International Innovation Center for Forest Chemicals and Materials, College of Chemical Engineering, Nanjing Forestry University, Nanjing, 210037, P. R. China

<sup>c</sup>Center for Clinical Pharmacy, Cancer Center, Department of Pharmacy, Zhejiang Provincial People's Hospital (Affiliated People's Hospital), Hangzhou Medical College, Hangzhou, 310011, P. R. China

<sup>d</sup>College of Material, Chemistry and Chemical Engineering, Key Laboratory of Organosilicon Chemistry and Material Technology, Ministry of Education, Hangzhou Normal University, Hangzhou, 311121, P R China

Email: [chemzp@tzc.edu.cn](mailto:chemzp@tzc.edu.cn); [wwfang2020@njfu.edu.cn](mailto:wwfang2020@njfu.edu.cn); [yongmin.ma@tzc.edu.cn](mailto:yongmin.ma@tzc.edu.cn)

## Contents

|                                                        |     |
|--------------------------------------------------------|-----|
| 1. Optimization Tables .....                           | S3  |
| 2. General methods.....                                | S4  |
| 3. Spectrum Data.....                                  | S4  |
| 4. HRMS spectra of intermediates .....                 | S16 |
| 5. X-ray crystal data of <b>4a</b> and <b>4n</b> ..... | S18 |
| 6. NMR spectra of <b>4</b> .....                       | S33 |

**Table S1** Optimization of reaction conditions<sup>a,b</sup>
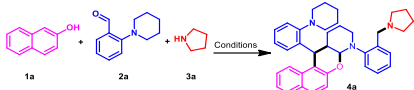

| Entry | Solvent            | Temp. (°C) | Ratio of 1a:2a:3a | Yield (%) |
|-------|--------------------|------------|-------------------|-----------|
| 1     | CH <sub>3</sub> CN | 80         | 1:2:1             | 54        |
| 2     | DMSO               | 80         | 1:2:1             | 7         |
| 3     | DMF                | 80         | 1:2:1             | trace     |
| 4     | PhCH <sub>3</sub>  | 80         | 1:2:1             | 0         |
| 5     | CCl <sub>4</sub>   | 80         | 1:2:1             | 14        |
| 6     | EtOH               | 80         | 1:2:1             | trace     |
| 7     | <sup>n</sup> BuOH  | 80         | 1:2:1             | 10        |
| 8     | <sup>t</sup> BuOH  | 80         | 1:2:1             | trace     |
| 9     | Dibutylether       | 80         | 1:2:1             | 0         |
| 10    | 1,4-Dioxane        | 80         | 1:2:1             | 0         |
| 11    | NMP                | 80         | 1:2:1             | 0         |
| 12    | DMEA               | 80         | 1:2:1             | 25        |
| 13    | 2-Butanone         | 80         | 1:2:1             | trace     |
| 14    | DCE                | 80         | 1:2:1             | 64        |
| 15    | DCE                | 80         | 1.5:2:1           | 48        |
| 16    | DCE                | 80         | 1:3:1             | 56        |
| 17    | DCE                | 80         | 1:2:1.5           | 68        |
| 18    | DCE                | <b>100</b> | <b>1:2:1.5</b>    | <b>78</b> |
| 19    | DCE                | 120        | 1:2:1.5           | 70        |

<sup>a</sup>Reaction conditions: **1a** (0.5 mmol), **2a** (1 mmol), **3a** (0.5 mmol) at 80 °C in solvent (2 mL) for 26 h unless indicated; <sup>b</sup>isolated yield.

**Table S2** Optimization of reaction conditions with 5,6,7,8-tetrahydronaphthalen-2-ol<sup>a</sup>
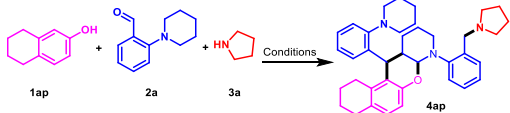

| Entry | Solvent | Temp. (°C) | Additive | Yield (%) |
|-------|---------|------------|----------|-----------|
| 1     | DCE     | 100        | HCl      | 0         |
| 2     | DCE     | 100        | HOAc     | trace     |
| 3     | DCE     | 100        | TFA      | 0         |
| 4     | DCE     | 100        | TsOH     | 0         |

<sup>a</sup>Reaction conditions: **1ap** (0.5 mmol), **2a** (1 mmol), **3a** (0.5 mmol) at 100 °C in solvent (2 mL) for 26 h.

**Table S3** Optimization of reaction conditions with diphenylamine<sup>a</sup>
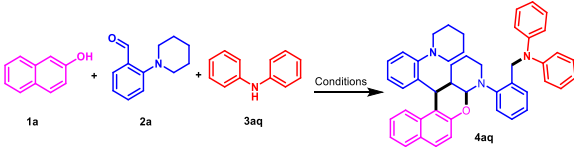

| Entry | Solvent | Temp. (°C) | Additive | Yield (%) |
|-------|---------|------------|----------|-----------|
| 1     | DCE     | 100        | HCl      | 0         |
| 2     | DCE     | 100        | HOAc     | trace     |
| 3     | DCE     | 100        | TFA      | 0         |
| 4     | DCE     | 100        | TsOH     | 0         |

<sup>a</sup>Reaction conditions: **1a** (0.5 mmol), **2a** (1 mmol), **3aq** (0.5 mmol) at 100 °C in solvent (2 mL) for 26 h.

**General methods.** Various aryl 2-(piperidin-1-yl)benzaldehydes, 2-(diethylamino)benzaldehyde and 2-(azepan-1-yl)benzaldehyde were prepared according to the previously reported literature.<sup>1</sup> Their analysis data were identical with the reported data. Other starting materials, reagents and solvents were purchased commercial sources and used as received. <sup>1</sup>H and <sup>13</sup>C NMR spectra were recorded at 400 and 101 MHz, respectively. High-resolution mass spectra (HRMS) were performed with a Q-TOF-Premier mass spectrometer. HPLC analyses were carried out on an Agilent 1260 Infinity II instrument. Melting points were determined using a X-4 digital micro melting point apparatus. Diffraction data were collected on a Bruker Smart Apex II CCD diffractometer with graphite-monochromated Mo K $\alpha$  ( $\lambda = 0.71073 \text{ \AA}$ ). All reactions were monitored by thin-layer chromatography (TLC) using silica gel plates (silica gel 60 F<sub>254</sub>).

**General Procedure for the synthesis of o-amino benzaldehydes 2 (2b as an example)** An oven-dried round-bottom flask was charged with 5-bromo-2-fluorobenzaldehyde (10 mmol, 1.0 equiv.), piperidine (12 mmol, 1.2 equiv.), K<sub>2</sub>CO<sub>3</sub> (20 mmol, 2.0 equiv.) and DMF (50 mL). The reaction mixture was stirred vigorously, refluxed in an oil bath for 12 h, and monitored by TLC. Upon consumption, the mixture was cooled to room temperature, diluted with water (100 mL), and extracted with EtOAc (3 x 100 mL). The combined extracts were washed with brine (3 x 50 mL), dried by anhydrous Na<sub>2</sub>SO<sub>4</sub>, filtered, and concentrated under reduced pressure, and the residue was purified by flash column chromatography (column chromatography eluent, petroleum ether/EtOAc) to afford **2b**.

**4-Bromo-2-(piperidin-1-yl)benzaldehyde (2b).** Petroleum ether/ethyl acetate (50:1) as eluent; Yellow oil (2.4 g, 90%). <sup>1</sup>H NMR (400 MHz, CDCl<sub>3</sub>)  $\delta$  10.19 (s, 1H), 7.63 (d,  $J = 8.2$  Hz, 1H), 7.23 – 7.15 (m, 2H), 3.10 – 2.99 (m, 4H), 1.80 – 1.70 (m, 4H), 1.65 – 1.55 (m, 2H).

**4-Chloro-2-(piperidin-1-yl)benzaldehyde (2c).**<sup>2</sup> Petroleum ether/ethyl acetate (50:1) as eluent; Yellow oil (2.2 g, 97%). <sup>1</sup>H NMR (400 MHz, CDCl<sub>3</sub>)  $\delta$  10.19 (s, 1H), 7.72 (d,  $J = 8.2$  Hz, 1H), 7.07 – 6.99 (m, 2H), 3.10 – 3.01 (m, 4H), 1.80 – 1.71 (m, 4H), 1.65 – 1.55 (m, 2H).

**4-Methyl-2-(piperidin-1-yl)benzaldehyde (2d).** Petroleum ether/ethyl acetate (30:1) as eluent; Yellow oil (2.0 g, 98%). <sup>1</sup>H NMR (400 MHz, CDCl<sub>3</sub>)  $\delta$  10.24 (s, 1H), 7.70 (d,  $J = 8.1$  Hz, 1H), 6.85 – 6.91 (m, 2H), 3.10 – 2.98 (m, 4H), 2.38 (s, 3H), 1.80 – 1.71 (m, 4H), 1.64 – 1.55 (m, 2H).

**4-Formyl-3-(piperidin-1-yl)benzotrile (2e).**<sup>3</sup> Petroleum ether/ethyl acetate (30:1) as eluent; Yellow oil (2.1 g, 98%). <sup>1</sup>H NMR (400 MHz, CDCl<sub>3</sub>)  $\delta$  10.24 (s, 1H), 7.84 (d,  $J = 7.9$  Hz, 1H), 7.37 – 7.24 (m, 2H), 3.15 – 3.04 (m, 4H), 1.83 – 1.74 (m, 4H), 1.68 – 1.60 (m, 2H).

**Methyl 4-formyl-3-(piperidin-1-yl)benzoate (2f).** Petroleum ether/ethyl acetate (30:1) as eluent; Yellow oil (2.3 g, 95%). <sup>1</sup>H NMR (400 MHz, CDCl<sub>3</sub>)  $\delta$  10.31 (s, 1H), 7.86 – 7.66 (m, 3H), 3.94 (s, 3H), 3.13 – 2.82 (m, 6H), 1.83 – 1.73 (m, 4H), 1.67 – 1.56 (m, 2H).

**5-Bromo-2-(piperidin-1-yl)benzaldehyde (2g).**<sup>2</sup> Petroleum ether/ethyl acetate (30:1) as eluent; Yellow oil (2.6 g, 98%). <sup>1</sup>H NMR (400 MHz, CDCl<sub>3</sub>)  $\delta$  10.20 (s, 1H), 7.88 (d,  $J = 2.6$  Hz, 1H), 7.57 (dd,  $J = 8.6, 2.5$  Hz, 1H), 6.98 (d,  $J = 8.6$  Hz, 1H), 3.06 – 2.97 (m, 4H), 1.81 – 1.71 (m, 4H), 1.64 – 1.56 (m, 2H).

**5-Chloro-2-(piperidin-1-yl)benzaldehyde (2h).** Petroleum ether/ethyl acetate (30:1) as eluent; Yellow oil (2.2 g, 98%). <sup>1</sup>H NMR (400 MHz, CDCl<sub>3</sub>)  $\delta$  10.23 (s, 1H), 7.74 (d,  $J = 2.6$  Hz, 1H), 7.43 (dd,  $J = 8.7, 2.7$  Hz, 1H), 7.04 (d,  $J = 8.7$  Hz, 1H), 3.07 – 2.98 (m, 4H), 1.82 – 1.71 (m, 4H), 1.65 – 1.56 (m, 2H).

**5-Methyl-2-(piperidin-1-yl)benzaldehyde (2i).** Petroleum ether/ethyl acetate (30:1) as eluent; Yellow oil (1.9 g, 96%). <sup>1</sup>H NMR (400 MHz, CDCl<sub>3</sub>)  $\delta$  10.19 (s, 1H), 7.64 (d,  $J = 8.2$  Hz, 1H), 7.25 – 7.10 (m, 2H), 3.10 – 2.84 (m, 7H), 1.82 – 1.71 (m, 4H), 1.65 – 1.56 (m, 2H).

**2-(Diethylamino)benzaldehyde (2j).**<sup>4</sup> Petroleum ether/ethyl acetate (30:1) as eluent; Yellow oil (1.7 g, 98%).

<sup>1</sup>H NMR (400 MHz, CDCl<sub>3</sub>) δ 10.36 (s, 1H), 7.81 (dd, *J* = 7.7, 1.8 Hz, 1H), 7.53 – 7.46 (m, 1H), 7.16 (d, *J* = 8.3 Hz, 1H), 7.09 (t, *J* = 7.2 Hz, 1H), 3.19 (q, *J* = 7.1 Hz, 4H), 1.07 (t, *J* = 7.0 Hz, 6H).

**2-(Azepan-1-yl)benzaldehyde (2k).**<sup>1</sup> Petroleum ether/ethyl acetate (30:1) as eluent; Yellow oil (1.9 g, 96%).

<sup>1</sup>H NMR (400 MHz, CDCl<sub>3</sub>) δ 10.20 (s, 1H), 7.74 (dd, *J* = 7.8, 1.8 Hz, 1H), 7.44 – 7.38 (m, 1H), 7.08 (d, *J* = 8.8 Hz, 1H), 6.93 (t, *J* = 7.4 Hz, 1H), 3.44 – 3.35 (m, 4H), 1.86 – 1.78 (m, 4H), 1.73 – 1.65 (m, 4H).

**2-Chloro-6-(piperidin-1-yl)benzaldehyde (2l).** Petroleum ether/ethyl acetate (30:1) as eluent; Yellow oil (2.1 g, 95%). <sup>1</sup>H NMR (400 MHz, CDCl<sub>3</sub>) δ 10.25 (s, 1H), 7.35 (t, *J* = 8.1 Hz, 1H), 7.06 – 6.97 (m, 2H), 3.08 – 2.98 (m, 4H), 1.82 – 1.70 (m, 4H), 1.65 – 1.59 (m, 2H).

**2-Methoxy-6-(piperidin-1-yl)benzaldehyde (2m).**<sup>5</sup> Petroleum ether/ethyl acetate (30:1) as eluent; Yellow oil (2.1 g, 95%). <sup>1</sup>H NMR (400 MHz, CDCl<sub>3</sub>) δ 10.26 (s, 1H), 7.40 (t, *J* = 8.3 Hz, 1H), 6.66 (d, *J* = 8.2 Hz, 1H), 6.56 (d, *J* = 8.3 Hz, 1H), 3.88 (s, 3H), 3.14 – 2.93 (m, 4H), 1.82 – 1.65 (m, 4H), 1.63 – 1.51 (m, 2H).

**3-Bromo-2-(piperidin-1-yl)benzaldehyde (2n).** Petroleum ether/ethyl acetate (30:1) as eluent; Yellow oil (2.6 g, 98%). <sup>1</sup>H NMR (400 MHz, CDCl<sub>3</sub>) δ 10.46 (s, 1H), 7.75 (d, *J* = 7.8 Hz, 2H), 7.08 (t, *J* = 7.8 Hz, 1H), 3.74 – 2.85 (m, 4H), 1.82 – 1.62 (m, 6H).

**3-Chloro-2-(piperidin-1-yl)benzaldehyde (2o).**<sup>6</sup> Petroleum ether/ethyl acetate (30:1) as eluent; Yellow oil (2.2 g, 98%). <sup>1</sup>H NMR (400 MHz, CDCl<sub>3</sub>) δ 10.49 (s, 1H), 7.70 (dd, *J* = 7.7, 1.6 Hz, 1H), 7.54 (dd, *J* = 7.9, 1.6 Hz, 1H), 7.14 (t, *J* = 7.8 Hz, 1H), 3.56 – 2.95 (m, 4H), 1.78 – 1.60 (m, 6H).

**2-(Azocan-1-yl)benzaldehyde (2p).**<sup>7</sup> Petroleum ether/ethyl acetate (30:1) as eluent; Yellow oil (2.1 g, 97%). <sup>1</sup>H NMR (400 MHz, CDCl<sub>3</sub>) δ 10.28 (s, 1H), 7.74 (dd, *J* = 7.8, 1.8 Hz, 1H), 7.46 – 7.39 (m, 1H), 7.13 (d, *J* = 8.5 Hz, 1H), 6.93 (t, *J* = 7.4 Hz, 1H), 3.51 – 3.34 (m, 4H), 1.79 – 1.64 (m, 10H).

**General Procedure for the synthesis of N,O-acetals 4 (4a as an example).** A sealed tube was charged with naphthalen-2-ol **1a** (0.5 mmol, 1 equiv.), 2-(piperidin-1-yl)benzaldehyde **2a** (1 mmol, 2 equiv.), pyrrolidine **3a** (0.75 mmol, 1.5 equiv.) and dichloroethane (2 mL). The reaction was carried at 100 °C for 26 hours until almost completed conversion of the substrates by TLC analysis. After completion of the reaction, the reaction solvent was evaporated and the residue was added in petroleum ether/ethyl acetate (8:1) solution. The precipitate was filtered by a Buchner funnel and washed with petroleum ether/ethyl acetate (8:1) twice. Drying the filter cake under vacuo afforded the pure product **4a**.

**Gram-scale preparation of N,O-acetal 4a.** A solution of naphthalen-2-ol **1a** (5 mmol, 1 equiv.), 2-(piperidin-1-yl)benzaldehyde **2a** (10 mmol, 2 equiv.), pyrrolidine **3a** (7.5 mmol, 1.5 equiv.) in dichloroethane (20 mL) was heated at 100 °C for 26 hours. After completion of the reaction, the reaction solvent was evaporated and the residue was added in petroleum ether/ethyl acetate (8:1) solution. The precipitate was filtered by a Buchner funnel and washed with petroleum ether/ethyl acetate (8:1) twice (10 mL × 2). Drying the filter cake under vacuo afforded yellow product **4a** (1.95 g, 70%).

**12-(2-(Piperidin-1-yl)phenyl)-8-(2-(pyrrolidin-1-ylmethyl)phenyl)-7a,8,10,11,11a,12-hexahydro-9H-benzo[5,6]chromeno[2,3-*b*]pyridine (4a).** Yellow solid (217.3 mg, 78%), mp 175 - 176 °C. <sup>1</sup>H NMR (400 MHz, CDCl<sub>3</sub>) δ 7.81 – 7.61 (m, 3H), 7.52 (d, *J* = 7.6 Hz, 1H), 7.43 (d, *J* = 6.8 Hz, 1H), 7.35 – 7.07 (m, 7H), 6.75 (t, *J* = 7.5 Hz, 1H), 6.57 (d, *J* = 7.7 Hz, 1H), 4.94 (s, 1H), 4.80 (s, 1H), 3.71 – 2.76 (m, 8H), 2.50 – 2.27 (m, 5H), 2.00 – 1.54 (m, 14H). <sup>13</sup>C NMR (101 MHz, CDCl<sub>3</sub>) δ 153.0, 151.9, 149.9, 141.9, 133.3, 130.5, 129.6, 129.4, 128.6, 128.5, 127.9, 127.3, 126.2, 124.9, 124.7, 124.5, 123.2, 122.8, 122.1, 119.2, 113.1, 85.5, 55.0, 54.3, 53.7, 45.7, 41.3, 40.8, 27.4, 26.0, 25.7, 24.4, 23.3. HRMS (ESI) *m/z*: [M + H]<sup>+</sup> Calcd for C<sub>38</sub>H<sub>44</sub>N<sub>3</sub>O 558.3479; found 558.3488.

**2-Methyl-12-(2-(piperidin-1-yl)phenyl)-8-(2-(pyrrolidin-1-ylmethyl)phenyl)-7a,8,10,11,11a,12-hexahydro-9H-benzo[5,6]chromeno[2,3-b]pyridine (4b).** Yellow solid (188.5 mg, 66%), mp 135 - 136 °C. <sup>1</sup>H NMR (400 MHz, CDCl<sub>3</sub>) δ 7.70 – 7.55 (m, 3H), 7.44 (d, *J* = 7.7 Hz, 1H), 7.33 – 7.20 (m, 3H), 7.18 – 7.07 (m, 3H), 7.05 (d, *J* = 8.2 Hz, 1H), 6.76 (t, *J* = 7.5 Hz, 1H), 6.66 (d, *J* = 7.8 Hz, 1H), 5.09 (s, 1H), 4.87 (s, 1H), 3.67 – 2.77 (m, 8H), 2.45 – 2.17 (m, 8H), 1.99 – 1.57 (m, 14H). <sup>13</sup>C NMR (101 MHz, CDCl<sub>3</sub>) δ 153.0, 151.7, 149.9, 142.0, 135.6, 133.5, 130.1, 129.5, 128.2, 128.2, 127.5, 127.4, 127.1, 124.9, 124.5, 124.4, 122.7, 121.8, 118.2, 113.0, 85.3, 55.0, 55.0 (2), 54.0, 45.5, 41.0, 40.1, 27.3, 26.0, 25.9, 24.5, 23.4, 22.2. HRMS (ESI) *m/z*: [M + H]<sup>+</sup> Calcd for C<sub>39</sub>H<sub>46</sub>N<sub>3</sub>O 572.3635; found 572.3626.

**2-Methoxy-12-(2-(piperidin-1-yl)phenyl)-8-(2-(pyrrolidin-1-ylmethyl)phenyl)-7a,8,10,11,11a,12-hexahydro-9H-benzo[5,6]chromeno[2,3-b]pyridine (4c).** Yellow solid (182.0 mg, 62%), mp 159 - 160 °C. <sup>1</sup>H NMR (400 MHz, CDCl<sub>3</sub>) δ 7.66 – 7.53 (m, 3H), 7.42 (d, *J* = 7.7 Hz, 1H), 7.30 – 7.19 (m, 2H), 7.14 – 7.07 (m, 2H), 7.02 (dd, *J* = 8.8, 2.7 Hz, 1H), 6.87 (dt, *J* = 8.8, 2.5 Hz, 1H), 6.75 (t, *J* = 7.4 Hz, 1H), 6.68 (s, 1H), 6.60 (d, *J* = 7.7 Hz, 1H), 4.97 (s, 1H), 4.70 (s, 1H), 3.66 – 2.82 (m, 11H), 2.46 – 2.21 (m, 5H), 1.97 – 1.50 (m, 14H). <sup>13</sup>C NMR (101 MHz, CDCl<sub>3</sub>) δ 157.9, 153.8, 152.0, 149.9, 141.5, 134.6, 134.0, 130.2, 129.9, 129.6, 128.2, 127.4, 127.2, 124.6, 124.5, 124.5, 124.5, 121.9, 116.7, 114.7, 112.4, 102.9, 85.4, 55.1, 55.0, 54.0, 45.6, 41.4, 41.0, 29.8, 27.4, 26.1, 25.9, 24.4, 23.4. HRMS (ESI) *m/z*: [M + H]<sup>+</sup> Calcd for C<sub>39</sub>H<sub>46</sub>N<sub>3</sub>O<sub>2</sub> 588.3585; found 588.3580.

**2-Ethoxy-12-(2-(piperidin-1-yl)phenyl)-8-(2-(pyrrolidin-1-ylmethyl)phenyl)-7a,8,10,11,11a,12-hexahydro-9H-benzo[5,6]chromeno[2,3-b]pyridine (4d).** Yellow solid (207.4 mg, 69%), mp 126 - 127 °C. <sup>1</sup>H NMR (400 MHz, CDCl<sub>3</sub>) δ 7.91 (d, *J* = 7.6 Hz, 1H), 7.78 (d, *J* = 8.0 Hz, 1H), 7.65 – 7.56 (m, 2H), 7.41 (t, *J* = 7.8 Hz, 1H), 7.32 – 7.23 (m, 2H), 7.15 (t, *J* = 7.8 Hz, 1H), 7.02 (d, *J* = 8.8 Hz, 1H), 6.89 (dd, *J* = 8.8, 2.4 Hz, 1H), 6.78 (t, *J* = 7.4 Hz, 1H), 6.67 (d, *J* = 2.4 Hz, 1H), 6.60 (d, *J* = 7.7 Hz, 1H), 4.78 (s, 1H), 4.72 (s, 1H), 3.99 – 3.49 (m, 6H), 3.33 – 2.64 (m, 8H), 2.30 – 1.62 (m, 15H), 1.24 (t, *J* = 6.9 Hz, 3H). <sup>13</sup>C NMR (101 MHz, CDCl<sub>3</sub>) δ 157.3, 153.1, 151.9, 150.4, 141.5, 134.4, 131.9, 130.4, 123.0, 129.4, 128.5, 127.5, 126.5, 126.1, 124.7, 124.5, 121.9, 116.3, 115.5, 112.0, 103.5, 85.2, 63.0, 55.1, 52.6, 52.1, 46.4, 42.5, 40.8, 27.3, 26.0, 25.3, 24.3, 22.9, 14.5. HRMS (ESI) *m/z*: [M + H]<sup>+</sup> Calcd for C<sub>40</sub>H<sub>48</sub>N<sub>3</sub>O<sub>2</sub> 602.3741; found 602.3745.

**2-Bromo-12-(2-(piperidin-1-yl)phenyl)-8-(2-(pyrrolidin-1-ylmethyl)phenyl)-7a,8,10,11,11a,12-hexahydro-9H-benzo[5,6]chromeno[2,3-b]pyridine (4e).** Yellow solid (222.3 mg, 70%), mp 89 - 90 °C. <sup>1</sup>H NMR (400 MHz, CDCl<sub>3</sub>) δ 7.73 (d, *J* = 6.1 Hz, 1H), 7.65 (t, *J* = 7.9 Hz, 1H), 7.56 (d, *J* = 8.9 Hz, 1H), 7.50 (d, *J* = 8.6 Hz, 1H), 7.42 (t, *J* = 6.8 Hz, 1H), 7.33 – 7.20 (m, 3H), 7.19 – 7.04 (m, 3H), 6.80 – 6.65 (m, 2H), 5.29 (s, 1H), 4.89 (s, 1H), 3.66 – 2.80 (m, 8H), 2.41 – 2.17 (m, 5H), 2.04 – 1.54 (m, 14H). <sup>13</sup>C NMR (101 MHz, CDCl<sub>3</sub>) δ 153.4, 151.6, 149.9, 141.5, 134.9, 134.7, 130.2, 129.9, 129.3, 128.2, 127.8, 127.4, 127.3, 126.1, 126.0, 124.7, 124.6, 124.3, 121.7, 120.8, 119.6, 113.6, 85.7, 55.4, 55.0, 54.1, 45.5, 40.6, 39.4, 27.4, 26.2, 26.0, 24.5, 23.5. HRMS (ESI) *m/z*: [M + H]<sup>+</sup> Calcd for C<sub>38</sub>H<sub>43</sub><sup>79</sup>BrN<sub>3</sub>O 636.2584; found 636.2587; [M + H]<sup>+</sup> Calcd for C<sub>38</sub>H<sub>43</sub><sup>81</sup>BrN<sub>3</sub>O 638.2564; found 638.2576.

**3-Methyl-12-(2-(piperidin-1-yl)phenyl)-8-(2-(pyrrolidin-1-ylmethyl)phenyl)-7a,8,10,11,11a,12-hexahydro-9H-benzo[5,6]chromeno[2,3-b]pyridine (4f).** Yellow solid (199.9 mg, 70%), mp 105 - 106 °C. <sup>1</sup>H NMR (400 MHz, CDCl<sub>3</sub>) δ 7.60 (t, *J* = 9.3 Hz, 2H), 7.50 (s, 1H), 7.45 (s, 1H), 7.33 (d, *J* = 8.5 Hz, 1H), 7.30 – 7.23 (m, 2H), 7.17 – 7.05 (m, 4H), 6.75 (t, *J* = 7.4 Hz, 1H), 6.58 (d, *J* = 7.6 Hz, 1H), 4.95 (s, 1H), 4.78 (s, 1H), 3.70 – 2.79 (m, 8H), 2.56 – 2.21 (m, 8H), 1.97 – 1.59 (m, 14H). <sup>13</sup>C NMR (101 MHz, CDCl<sub>3</sub>) δ 152.6, 151.9, 149.9, 142.0, 132.1, 131.4, 130.2, 129.6, 128.3, 127.9, 127.2, 124.5, 123.1, 122.0, 119.2, 113.1, 85.4, 54.8, 53.9, 45.5, 41.2, 40.8, 27.4, 26.0, 25.8, 24.5, 23.4, 21.2. HRMS (ESI) *m/z*: [M + H]<sup>+</sup> Calcd for C<sub>39</sub>H<sub>46</sub>N<sub>3</sub>O 572.3635; found 572.3632.

**3-Ethyl-12-(2-(piperidin-1-yl)phenyl)-8-(2-(pyrrolidin-1-ylmethyl)phenyl)-7a,8,10,11,11a,12-hexahydro-9H-benzo[5,6]chromeno[2,3-b]pyridine (4g).** Yellow solid (213.6 mg, 73%), mp 76 - 77 °C. <sup>1</sup>H NMR (400 MHz, CDCl<sub>3</sub>) δ 7.61 (d, *J* = 9.1 Hz, 2H), 7.50 (s, 1H), 7.43 (d, *J* = 7.6 Hz, 1H), 7.37 (d, *J* = 8.7 Hz, 1H), 7.29 – 7.19 (m, 2H), 7.16 – 7.06 (m, 4H), 6.74 (t, *J* = 7.4 Hz, 1H), 6.59 (d, *J* = 7.7 Hz, 1H), 4.96 (s, 1H), 4.78 (s, 1H), 3.64 – 2.81 (m, 8H), 3.37 (q, *J* = 19.2 Hz, 2H), 2.48 – 2.20 (m, 5H), 1.96 – 1.56 (m, 14H), 1.24 (t, *J* = 7.6 Hz, 3H). <sup>13</sup>C NMR (101 MHz, CDCl<sub>3</sub>) δ 152.6, 152.0, 149.9, 142.1, 138.5, 133.9, 131.7, 130.2, 129.7, 129.6, 128.1, 127.5, 127.3, 127.2, 126.4, 124.5, 124.5, 123.3, 122.1, 119.2, 113.1, 85.4, 55.0, 54.9, 54.0, 45.6, 41.2, 40.8, 29.8, 28.6, 27.4, 26.1, 25.9, 24.5, 23.5, 15.6. HRMS (ESI) *m/z*: [M + H]<sup>+</sup> Calcd for C<sub>40</sub>H<sub>48</sub>N<sub>3</sub>O 586.3792; found 586.3788.

**3-Methoxy-12-(2-(piperidin-1-yl)phenyl)-8-(2-(pyrrolidin-1-ylmethyl)phenyl)-7a,8,10,11,11a,12-hexahydro-9H-benzo[5,6]chromeno[2,3-b]pyridine (4h).** Purified by column chromatography using petroleum ether/ethyl acetate/Et<sub>3</sub>N (35:1:0.04) as eluent, yellow solid (196.7 mg, 67%), mp 74 - 75 °C. <sup>1</sup>H NMR (400 MHz, CDCl<sub>3</sub>) δ 7.59 (d, *J* = 7.9 Hz, 1H), 7.58 (d, *J* = 10.2 Hz, 1H), 7.44 (d, *J* = 7.6 Hz, 1H), 7.33 (d, *J* = 9.2 Hz, 1H), 7.30 – 7.22 (m, 2H), 7.18 – 7.06 (m, 4H), 6.92 (dd, *J* = 9.2, 2.7 Hz, 1H), 6.75 (t, *J* = 8.0 Hz, 1H), 6.56 (d, *J* = 7.6 Hz, 1H), 4.93 (s, 1H), 4.76 (s, 1H), 3.84 (s, 3H), 3.66 – 2.76 (m, 8H), 2.50 – 2.19 (m, 5H), 1.96 – 1.56 (m, 14H). <sup>13</sup>C NMR (101 MHz, CDCl<sub>3</sub>) δ 155.4, 151.9, 151.5, 149.9, 142.0, 130.2, 130.1, 129.6, 128.4, 127.4, 127.3, 127.2, 124.8, 124.5, 124.5, 124.4, 122.1, 119.7, 118.2, 113.5, 107.2, 85.3, 55.3, 55.0, 54.8, 53.9, 45.5, 41.2, 40.8, 27.4, 26.0, 25.8, 24.4, 23.4. HRMS (ESI) *m/z*: [M + H]<sup>+</sup> Calcd for C<sub>39</sub>H<sub>46</sub>N<sub>3</sub>O<sub>2</sub> 588.3585; found 588.3592.

**3-Bromo-12-(2-(piperidin-1-yl)phenyl)-8-(2-(pyrrolidin-1-ylmethyl)phenyl)-7a,8,10,11,11a,12-hexahydro-9H-benzo[5,6]chromeno[2,3-b]pyridine (4i).** Yellow solid (235.0 mg, 74%), mp 103 - 104 °C. <sup>1</sup>H NMR (400 MHz, CDCl<sub>3</sub>) δ 7.85 (s, 1H), 7.62 (d, *J* = 7.9 Hz, 1H), 7.56 (d, *J* = 8.9 Hz, 1H), 7.43 (d, *J* = 7.6 Hz, 1H), 7.35 – 7.23 (m, 4H), 7.21 – 7.09 (m, 3H), 6.76 (t, *J* = 7.4 Hz, 1H), 6.54 (d, *J* = 7.5 Hz, 1H), 5.00 (s, 1H), 4.77 (s, 1H), 3.64 – 2.79 (m, 8H), 2.48 – 2.27 (m, 5H), 1.97 – 1.50 (m, 14H). <sup>13</sup>C NMR (101 MHz, CDCl<sub>3</sub>) δ 153.3, 151.8, 149.8, 141.6, 133.4, 131.9, 130.6, 130.3, 129.4, 129.4, 127.7, 127.6, 127.4, 125.1, 124.8, 124.7, 124.5, 122.2, 120.4, 116.4, 113.6, 85.7, 55.0, 54.7, 53.8, 45.6, 41.1, 40.5, 27.4, 26.0, 25.8, 24.4, 23.4. HRMS (ESI) *m/z*: [M + H]<sup>+</sup> Calcd for C<sub>38</sub>H<sub>43</sub><sup>79</sup>BrN<sub>3</sub>O 636.2584; found 636.2584; [M + H]<sup>+</sup> Calcd for C<sub>38</sub>H<sub>43</sub><sup>81</sup>BrN<sub>3</sub>O 638.2564; found 638.2577.

**12-(2-(Piperidin-1-yl)phenyl)-8-(2-(pyrrolidin-1-ylmethyl)phenyl)-7a,8,10,11,11a,12-hexahydro-9H-benzo[5,6]chromeno[2,3-b]pyridine-3-carbonitrile (4j).** Yellow solid (203.7 mg, 80%), mp 177 - 178 °C. <sup>1</sup>H NMR (400 MHz, CDCl<sub>3</sub>) δ 8.07 (d, *J* = 1.7 Hz, 1H), 7.70 (d, *J* = 9.0 Hz, 1H), 7.60 (d, *J* = 7.9 Hz, 1H), 7.50 (d, *J* = 8.8 Hz, 1H), 7.45 (d, *J* = 7.6 Hz, 1H), 7.37 (dd, *J* = 8.9, 1.8 Hz, 1H), 7.33 – 7.23 (m, 3H), 7.17 – 7.10 (m, 2H), 6.76 (t, *J* = 7.5 Hz, 1H), 6.50 (d, *J* = 7.8 Hz, 1H), 5.08 (s, 1H), 4.80 (s, 1H), 3.66 – 2.83 (m, 8H), 2.52 – 2.21 (m, 5H), 2.00 – 1.52 (m, 14H). <sup>13</sup>C NMR (101 MHz, CDCl<sub>3</sub>) δ 155.6, 151.8, 149.6, 141.1, 135.3, 134.3, 130.7, 129.3, 129.0, 128.3, 127.7, 127.1, 125.3, 125.0, 124.6, 124.3, 122.4, 121.1, 119.6, 114.0, 106.0, 86.2, 55.1, 54.2, 53.6, 45.7, 41.0, 40.4, 29.7, 27.3, 25.9, 25.7, 24.3, 23.3. HRMS (ESI) *m/z*: [M + H]<sup>+</sup> Calcd for C<sub>39</sub>H<sub>43</sub>N<sub>4</sub>O 583.3431; found 583.3429.

**12-(2-(Piperidin-1-yl)phenyl)-8-(2-(pyrrolidin-1-ylmethyl)phenyl)-7a,8,10,11,11a,12-hexahydro-9H-benzo[5,6]chromeno[2,3-b]pyridine-3-carboxylic acid (4k).** Yellow solid (96.2 mg, 32%), mp 160 - 161 °C. <sup>1</sup>H NMR (400 MHz, CDCl<sub>3</sub>) δ 8.51 (s, 1H), 7.89 – 7.75 (m, 3H), 7.72 (d, *J* = 8.0 Hz, 1H), 7.47 (d, *J* = 9.0 Hz, 1H), 7.38 (t, *J* = 7.9 Hz, 1H), 7.34 – 7.20 (m, 3H), 7.16 (t, *J* = 7.6 Hz, 1H), 6.77 (t, *J* = 7.4 Hz, 1H), 6.52 (d, *J* = 7.6 Hz, 1H), 4.89 (s, 1H), 4.84 (s, 1H), 4.57 (t, *J* = 5.8 Hz, 2H), 3.86 – 3.46 (m, 4H), 3.33 – 2.18 (m, 9H), 2.11 – 1.66 (m, 12H). <sup>13</sup>C NMR (101 MHz, CDCl<sub>3</sub>) δ 166.4, 154.8, 151.9, 150.0, 141.4, 136.0, 131.8, 131.5, 130.2, 129.7, 129.3, 128.6, 127.7, 126.2, 126.0, 125.7, 124.6, 124.0, 123.4,

122.3, 120.0, 113.5, 85.9, 64.4, 55.1, 53.0, 52.7, 46.1, 41.8, 41.7, 40.5, 27.4, 25.9, 25.4, 24.3, 23.1. HRMS (ESI) m/z: [M + H]<sup>+</sup> Calcd for C<sub>39</sub>H<sub>44</sub>N<sub>3</sub>O<sub>3</sub> 602.3377; found 602.3380.

**5-Bromo-12-(2-(piperidin-1-yl)phenyl)-8-(2-(pyrrolidin-1-ylmethyl)phenyl)-7a,8,10,11,11a,12-hexahydro-9H-benzo[5,6]chromeno[2,3-b]pyridine (4l).** Yellow solid (257.2 mg, 81%), mp 124 - 125 °C. <sup>1</sup>H NMR (400 MHz, CDCl<sub>3</sub>) δ 8.14 (dd, *J* = 8.2, 1.6 Hz, 1H), 7.66–7.52 (m, 3H), 7.44 (d, *J* = 8.0 Hz, 1H), 7.37–7.23 (m, 4H), 7.21–7.10 (m, 2H), 6.76 (t, *J* = 7.5 Hz, 1H), 6.55 (dd, *J* = 7.7, 1.6 Hz, 1H), 4.93 (s, 1H), 4.78 (s, 1H), 3.63–2.74 (m, 8H), 2.55–2.31 (m, 5H), 1.98–1.54 (m, 14H). <sup>13</sup>C NMR (101 MHz, CDCl<sub>3</sub>) δ 152.7, 151.8, 149.7, 141.4, 134.1, 130.7, 129.4, 128.4, 127.9, 127.7, 127.5, 127.1, 125.3, 125.0, 124.6, 124.1, 123.6, 123.1, 122.4, 122.3, 113.4, 86.0, 55.0, 54.0, 53.5, 45.8, 41.2, 40.7, 27.4, 25.9, 25.6, 24.4, 23.3. HRMS (ESI) m/z: [M + H]<sup>+</sup> Calcd for C<sub>38</sub>H<sub>43</sub><sup>79</sup>BrN<sub>3</sub>O 636.2584; found 636.2591; [M + H]<sup>+</sup> Calcd for C<sub>38</sub>H<sub>43</sub><sup>81</sup>BrN<sub>3</sub>O 638.2564; found 638.2582.

**6-Methyl-12-(2-(piperidin-1-yl)phenyl)-8-(2-(pyrrolidin-1-ylmethyl)phenyl)-7a,8,10,11,11a,12-hexahydro-9H-benzo[5,6]chromeno[2,3-b]pyridine (4m).** Yellow solid (182.7 mg, 64%), mp 193–194 °C. <sup>1</sup>H NMR (400 MHz, CDCl<sub>3</sub>) δ 7.66 (t, *J* = 7.9 Hz, 2H), 7.52 (s, 1H), 7.44–7.30 (m, 2H), 7.34–7.06 (m, 6H), 6.74 (t, *J* = 7.4 Hz, 1H), 6.57 (d, *J* = 7.6 Hz, 1H), 4.97 (s, 1H), 4.79 (s, 1H), 3.68–2.81 (m, 8H), 2.57–2.17 (m, 8H), 2.06–1.50 (m, 14H). <sup>13</sup>C NMR (101 MHz, CDCl<sub>3</sub>) δ 152.1, 151.9, 149.9, 141.9, 134.8, 132.2, 130.1, 129.7, 129.0, 128.1, 127.9, 127.6, 127.2, 127.1, 125.2, 124.7, 124.5, 124.5, 123.0, 122.6, 122.1, 112.4, 85.6, 55.0, 54.0, 45.6, 40.8, 40.7, 27.4, 26.0, 25.8, 24.5, 23.4, 17.4. HRMS (ESI) m/z: [M + H]<sup>+</sup> Calcd for C<sub>39</sub>H<sub>46</sub>N<sub>3</sub>O 572.3635; found 572.3625.

**6-Methoxy-12-(2-(piperidin-1-yl)phenyl)-8-(2-(pyrrolidin-1-ylmethyl)phenyl)-7a,8,10,11,11a,12-hexahydro-9H-benzo[5,6]chromeno[2,3-b]pyridine (4n).** Yellow solid (182.0 mg, 62%), mp 145 - 146 °C. <sup>1</sup>H NMR (400 MHz, CDCl<sub>3</sub>) δ 7.80 (d, *J* = 7.9 Hz, 1H), 7.64 (d, *J* = 8.0 Hz, 1H), 7.43–7.32 (m, 2H), 7.32–7.16 (m, 3H), 7.16–7.06 (m, 3H), 7.06 (s, 1H), 6.72 (d, *J* = 7.6 Hz, 1H), 6.60 (d, *J* = 7.7 Hz, 1H), 5.03 (s, 1H), 4.83 (s, 1H), 4.00 (s, 3H), 3.68–2.75 (m, 8H), 2.48–2.16 (m, 5H), 1.99–1.52 (m, 14H). <sup>13</sup>C NMR (101 MHz, CDCl<sub>3</sub>) δ 152.1, 151.9, 149.9, 141.9, 134.8, 132.2, 130.1, 129.7, 129.0, 128.1, 127.9, 127.6, 127.2, 127.1, 125.2, 124.7, 124.5, 124.5, 123.0, 122.6, 122.1, 112.4, 85.6, 55.0, 54.0, 45.6, 40.8, 40.7, 27.4, 26.0, 25.8, 24.5, 23.4, 17.4. HRMS (ESI) m/z: [M + H]<sup>+</sup> Calcd for C<sub>39</sub>H<sub>46</sub>N<sub>3</sub>O<sub>2</sub> 588.3585; found 588.3584.

**6-Bromo-12-(2-(piperidin-1-yl)phenyl)-8-(2-(pyrrolidin-1-ylmethyl)phenyl)-7a,8,10,11,11a,12-hexahydro-9H-benzo[5,6]chromeno[2,3-b]pyridine (4o).** Yellow solid (231.8 mg, 73%), mp 188 - 189 °C. <sup>1</sup>H NMR (400 MHz, CDCl<sub>3</sub>) δ 8.02 (s, 1H), 7.95 (d, *J* = 8.0 Hz, 1H), 7.69–7.61 (m, 1H), 7.48–7.40 (m, 1H), 7.36 (d, *J* = 7.6 Hz, 1H), 7.33–7.19 (m, 4H), 7.13 (q, *J* = 7.7 Hz, 2H), 6.76 (t, *J* = 7.4 Hz, 1H), 6.57 (d, *J* = 7.7 Hz, 1H), 5.10 (s, 1H), 4.86 (s, 1H), 3.65–2.84 (m, 8H), 2.57–2.11 (m, 5H), 1.99–1.50 (m, 14H). <sup>13</sup>C NMR (101 MHz, CDCl<sub>3</sub>) δ 151.8, 149.6, 149.1, 141.3, 135.2, 132.4, 131.2, 130.1, 129.6, 129.5, 127.6, 127.5, 127.4, 126.4, 126.1, 125.0, 124.6, 123.5, 123.3, 122.2, 115.2, 113.8, 87.0, 55.1, 55.0, 54.0, 46.0, 41.1, 40.6, 27.4, 25.9, 24.4, 23.4. HRMS (ESI) m/z: [M + H]<sup>+</sup> Calcd for C<sub>38</sub>H<sub>43</sub><sup>79</sup>BrN<sub>3</sub>O 636.2584; found 636.2590; [M + H]<sup>+</sup> Calcd for C<sub>38</sub>H<sub>43</sub><sup>81</sup>BrN<sub>3</sub>O 638.2564; found 638.2582.

**14-(2-(Piperidin-1-yl)phenyl)-10-(2-(pyrrolidin-1-ylmethyl)phenyl)-9a,10,12,13,13a,14-hexahydro-11H-dibenzo[5,6:7,8]chromeno[2,3-b]pyridine (4p).** Yellow solid (215.5 mg, 71%), mp 194 - 195 °C. <sup>1</sup>H NMR (400 MHz, CDCl<sub>3</sub>) δ 8.69–8.55 (m, 2H), 8.44 (t, *J* = 4.1 Hz, 1H), 7.82 (d, *J* = 8.0 Hz, 1H), 7.72–7.61 (m, 2H), 7.60–7.47 (m, 2H), 7.44–7.26 (m, 4H), 7.22–7.09 (m, 2H), 6.80–6.68 (m, 2H), 5.12 (s, 1H), 4.83 (s, 1H), 3.80–2.76 (m, 8H), 2.58–2.31 (m, 5H), 2.07–1.54 (m, 14H). <sup>13</sup>C NMR (101 MHz, CDCl<sub>3</sub>) δ 152.0, 150.0, 148.2, 141.6, 132.5, 131.0, 130.6, 129.6, 128.1, 127.4, 126.8, 126.8, 126.5, 126.2, 124.9, 124.6, 124.4, 123.9, 123.5, 122.8, 122.7, 122.4, 122.3, 109.3, 86.0,



55.0, 54.5, 53.8, 45.8, 41.2, 41.2 (2), 29.7, 27.4, 26.0, 25.8, 24.5, 23.4, 14.2. HRMS (ESI) m/z: [M + H]<sup>+</sup> Calcd for C<sub>42</sub>H<sub>46</sub>N<sub>3</sub>O 608.3635; found 608.3639.

**12-(2-(Piperidin-1-yl)phenyl)-8-(2-(pyrrolidin-1-ylmethyl)phenyl)-7a,8,10,11,11a,12-hexahydro-9H-pyrido[3',2':5,6]pyrano[3,2-f]quinoline (4q).** Yellow solid (47.4 mg, 17% ), mp 185 - 186 °C. <sup>1</sup>H NMR (400 MHz, CDCl<sub>3</sub>) δ 7.77 – 7.61 (m, 4H), 7.46 – 7.40 (m, 1H), 7.38 – 7.09 (m, 6H), 6.75 (t, *J* = 7.5 Hz, 1H), 6.57 (dd, *J* = 7.7, 1.6 Hz, 1H), 4.88 (s, 1H), 4.80 (s, 1H), 3.67 – 3.53 (m, 3H), 3.30 – 2.32 (m, 10H), 1.96 – 1.60 (m, 14H). <sup>13</sup>C NMR (101 MHz, CDCl<sub>3</sub>) δ 152.87, 151.90, 150.02, 141.89, 133.28, 130.84, 129.56, 129.48, 128.68, 128.62, 128.50, 127.35, 126.29, 125.33, 125.10, 124.49, 123.22, 122.90, 122.13, 119.14, 113.02, 85.47, 55.00, 53.68, 53.40, 45.86, 41.54, 40.74, 29.73, 27.38, 26.03, 25.59, 24.40, 23.22. HRMS (ESI) m/z: [M + H]<sup>+</sup> Calcd for C<sub>37</sub>H<sub>43</sub>N<sub>4</sub>O 559.3431; found 559.3433.

**12-(4-Bromo-2-(piperidin-1-yl)phenyl)-8-(5-bromo-2-(pyrrolidin-1-ylmethyl)phenyl)-7a,8,10,11,11a,12-hexahydro-9H-benzo[5,6]chromeno[2,3-b]pyridine (4r).** Yellow solid (256.7 mg, 72%), mp 215 - 216 °C. <sup>1</sup>H NMR (400 MHz, CDCl<sub>3</sub>) δ 7.81 – 7.62 (m, 3H), 7.42 – 7.10 (m, 7H), 6.89 (d, *J* = 8.3 Hz, 1H), 6.45 (d, *J* = 8.2 Hz, 1H), 4.89 (s, 1H), 4.68 (s, 1H), 3.62 – 2.74 (m, 8H), 2.49 – 2.09 (m, 5H), 2.00 – 1.54 (m, 14H). <sup>13</sup>C NMR (101 MHz, CDCl<sub>3</sub>) δ 153.3, 152.9, 150.9, 140.9, 133.4, 133.1, 131.4, 131.2, 129.5, 128.9, 128.6, 127.6, 127.5, 127.5, 126.4, 125.8, 123.0, 122.9, 120.8, 120.6, 119.2, 112.3, 85.0, 54.9, 54.8, 54.1, 45.4, 40.8, 40.5, 27.2, 25.9, 25.6, 24.3, 23.5. HRMS (ESI) m/z: [M + H]<sup>+</sup> Calcd for C<sub>38</sub>H<sub>42</sub><sup>79</sup>Br<sub>2</sub>N<sub>3</sub>O 714.1689; found 714.1688; [M + H]<sup>+</sup> Calcd for C<sub>38</sub>H<sub>42</sub><sup>79</sup>Br<sup>81</sup>BrN<sub>3</sub>O 716.1669; found 716.1670.

**12-(4-Chloro-2-(piperidin-1-yl)phenyl)-8-(5-chloro-2-(pyrrolidin-1-ylmethyl)phenyl)-7a,8,10,11,11a,12-hexahydro-9H-benzo[5,6]chromeno[2,3-b]pyridine (4s).** Yellow solid (212.5 mg, 68%), mp 227 - 228 °C. <sup>1</sup>H NMR (400 MHz, CDCl<sub>3</sub>) δ 7.79 – 7.64 (m, 2H), 7.58 (s, 1H), 7.48 (d, *J* = 8.3 Hz, 1H), 7.36 (d, *J* = 7.2 Hz, 1H), 7.31 – 7.21 (m, 3H), 7.17 (d, *J* = 8.9 Hz, 1H), 7.12 (d, *J* = 8.2 Hz, 1H), 6.74 (dd, *J* = 8.4, 2.2 Hz, 1H), 6.51 (d, *J* = 8.3 Hz, 1H), 4.86 (s, 1H), 4.70 (s, 1H), 3.62 – 2.75 (m, 8H), 2.54 – 2.19 (m, 5H), 1.99 – 1.54 (m, 14H). <sup>13</sup>C NMR (101 MHz, CDCl<sub>3</sub>) δ 153.1, 152.7, 150.8, 140.3, 133.6, 133.0, 132.8, 131.6, 130.7, 129.6, 129.0, 128.6, 126.5, 125.3, 125.1, 124.5, 123.1, 123.0, 122.9, 119.1, 112.4, 85.0, 54.9, 53.8, 53.7, 45.7, 41.2, 40.4, 27.2, 25.9, 25.5, 24.3, 23.3. HRMS (ESI) m/z: [M + H]<sup>+</sup> Calcd for C<sub>38</sub>H<sub>42</sub><sup>35</sup>Cl<sub>2</sub>N<sub>3</sub>O 626.2699; found 626.2701; [M + H]<sup>+</sup> Calcd for C<sub>38</sub>H<sub>42</sub><sup>35</sup>Cl<sup>37</sup>ClN<sub>3</sub>O 628.2670; found 628.2678.

**12-(4-Methyl-2-(piperidin-1-yl)phenyl)-8-(5-methyl-2-(pyrrolidin-1-ylmethyl)phenyl)-7a,8,10,11,11a,12-hexahydro-9H-benzo[5,6]chromeno[2,3-b]pyridine (4t).** Yellow solid (204.8 mg, 70%), mp 218 - 219 °C. <sup>1</sup>H NMR (400 MHz, CDCl<sub>3</sub>) δ 7.78 – 7.63 (m, 2H), 7.58 (d, *J* = 7.8 Hz, 1H), 7.50 (s, 1H), 7.43 (d, *J* = 7.4 Hz, 1H), 7.31 – 7.12 (m, 3H), 6.99 – 7.09 (m, 2H), 6.55 (d, *J* = 7.9 Hz, 1H), 6.43 (d, *J* = 7.8 Hz, 1H), 4.84 (s, 1H), 4.74 (s, 1H), 3.78 – 3.51 (m, 3H), 3.30 – 2.28 (m, 13H), 2.22 (s, 3H), 1.96 – 1.55 (m, 14H). <sup>13</sup>C NMR (101 MHz, CDCl<sub>3</sub>) δ 152.8, 151.7, 150.0, 139.1, 138.7, 136.9, 133.3, 131.0, 129.5, 129.4, 128.6, 128.5, 126.4, 126.3, 126.1, 125.1, 123.3, 122.9, 122.9, 119.1, 113.2, 85.5, 55.0, 53.1, 53.0, 46.0, 41.7, 40.5, 27.4, 26.1, 25.5, 24.4, 23.1, 21.5, 21.1. HRMS (ESI) m/z: [M + H]<sup>+</sup> Calcd for C<sub>40</sub>H<sub>48</sub>N<sub>3</sub>O 586.3792; found 586.3795.

**12-(4-Methoxy-2-(piperidin-1-yl)phenyl)-8-(5-methoxy-2-(pyrrolidin-1-ylmethyl)phenyl)-7a,8,10,11,11a,12-hexahydro-9H-benzo[5,6]chromeno[2,3-b]pyridine (4u).** Yellow solid (179.0 mg, 58%), mp 163 - 164 °C. <sup>1</sup>H NMR (400 MHz, CDCl<sub>3</sub>) δ 7.80 – 7.59 (m, 2H), 7.57 – 7.36 (m, 2H), 7.36 – 7.18 (m, 3H), 7.16 (d, *J* = 8.9 Hz, 1H), 6.81 (s, 1H), 6.72 (d, *J* = 9.4 Hz, 1H), 6.47 (d, *J* = 8.5 Hz, 1H), 6.28 (d, *J* = 7.0 Hz, 1H), 4.92 (s, 1H), 4.67 (s, 1H), 3.85 (s, 3H), 3.68 (s, 3H), 3.62 – 2.74 (m, 8H), 2.60 – 2.29 (m, 5H), 2.02 – 1.54 (m, 14H). <sup>13</sup>C NMR (101 MHz, CDCl<sub>3</sub>) δ 159.5, 158.9, 153.0, 152.8, 151.3,

133.9, 133.3, 131.6, 130.3, 129.5, 128.6, 128.5, 126.2, 123.3, 122.9, 119.2, 113.3, 111.3, 109.9, 109.0, 108.3, 85.5, 55.3, 55.1, 54.9, 53.6, 53.3, 45.9, 41.5, 40.2, 27.3, 26.0, 25.6, 24.4, 23.2. HRMS (ESI)  $m/z$ :  $[M + H]^+$  Calcd for  $C_{40}H_{48}N_3O$  618.3690; found 618.3685.

**3-(12-(4-Cyano-2-(piperidin-1-yl)phenyl)-10,11,11a,12-tetrahydro-9H-benzo[5,6]chromeno[2,3-b]pyridin-8(7aH)-yl)-4-(pyrrolidin-1-ylmethyl)benzotrile (4v).** Purified by column chromatography using petroleum ether/ethyl acetate/ $Et_3N$  (35:1:0.04) as eluent, yellow solid (170.0 mg, 56%), mp 112 - 113 °C.  $^1H$  NMR (400 MHz,  $CDCl_3$ )  $\delta$  7.87 (s, 1H), 7.81 - 7.71 (m, 2H), 7.65 (s, 1H), 7.54 (s, 1H), 7.43 (d,  $J = 8.0$  Hz, 1H), 7.33 - 7.24 (m, 3H), 7.18 (d,  $J = 8.9$  Hz, 1H), 7.10 (d,  $J = 7.9$  Hz, 1H), 6.73 (d,  $J = 8.0$  Hz, 1H), 4.82 (s, 1H), 4.79 (s, 1H), 3.63 - 2.74 (m, 8H), 2.53 - 2.24 (m, 5H), 1.94 - 1.54 (m, 14H).  $^{13}C$  NMR (101 MHz,  $CDCl_3$ )  $\delta$  152.7, 152.6, 150.0, 147.6, 132.8, 131.1, 130.5, 129.7, 129.5, 128.8, 128.2, 126.7, 126.1, 123.3, 122.6, 119.1, 111.5, 111.3, 84.6, 54.8, 54.7, 54.1, 45.5, 40.9, 40.8, 27.1, 25.7, 25.6, 24.1, 23.5. HRMS (ESI)  $m/z$ :  $[M + H]^+$  Calcd for  $C_{40}H_{42}N_5O$  608.3384; found 608.3377.

**12-(5-Bromo-2-(piperidin-1-yl)phenyl)-8-(4-bromo-2-(pyrrolidin-1-ylmethyl)phenyl)-7a,8,10,11,11a,12-hexahydro-9H-benzo[5,6]chromeno[2,3-b]pyridine (4w).** Yellow solid (253.1 mg, 71%), mp 196 - 197 °C.  $^1H$  NMR (400 MHz,  $CDCl_3$ )  $\delta$  7.80 - 7.72 (m, 1H), 7.69 (d,  $J = 8.9$  Hz, 1H), 7.64 (d,  $J = 2.4$  Hz, 1H), 7.48 (d,  $J = 8.5$  Hz, 1H), 7.43 - 7.33 (m, 2H), 7.32 - 7.21 (m, 3H), 7.14 (d,  $J = 8.7$  Hz, 2H), 6.67 (d,  $J = 2.4$  Hz, 1H), 4.90 (s, 1H), 4.74 (s, 1H), 3.64 - 2.70 (m, 8H), 2.49 - 2.15 (m, 5H), 1.98 - 1.45 (m, 14H).  $^{13}C$  NMR (101 MHz,  $CDCl_3$ )  $\delta$  152.8, 151.1, 148.8, 144.5, 134.7, 133.2, 133.1, 132.0, 131.2, 130.6, 129.6, 129.1, 128.7, 126.7, 126.5, 124.2, 123.1, 122.9, 119.1, 118.6, 118.1, 112.0, 85.0, 54.9, 54.0, 53.7, 45.7, 41.2, 40.6, 27.3, 25.9, 25.6, 24.3, 23.4. HRMS (ESI)  $m/z$ :  $[M + H]^+$  Calcd for  $C_{38}H_{42}^{79}Br_2N_3O$  714.1689; found 714.1691;  $[M + H]^+$  Calcd for  $C_{38}H_{42}^{79}Br^{81}BrN_3O$  716.1669; found 714.1675.

**12-(5-Chloro-2-(piperidin-1-yl)phenyl)-8-(4-chloro-2-(pyrrolidin-1-ylmethyl)phenyl)-7a,8,10,11,11a,12-hexahydro-9H-benzo[5,6]chromeno[2,3-b]pyridine (4x).** Yellow solid (221.9 mg, 71%), mp 192 - 193 °C.  $^1H$  NMR (400 MHz,  $CDCl_3$ )  $\delta$  7.79 - 7.64 (m, 2H), 7.54 (d,  $J = 8.5$  Hz, 1H), 7.48 (d,  $J = 2.6$  Hz, 1H), 7.36 (d,  $J = 6.9$  Hz, 1H), 7.31 - 7.06 (m, 6H), 6.53 (d,  $J = 2.5$  Hz, 1H), 4.91 (s, 1H), 4.75 (s, 1H), 3.62 - 2.69 (m, 8H), 2.45 - 2.20 (m, 5H), 1.96 - 1.49 (m, 14H).  $^{13}C$  NMR (101 MHz,  $CDCl_3$ )  $\delta$  152.9, 150.6, 148.1, 144.1, 135.8, 133.1, 130.3, 130.0, 130.0 (2), 129.5, 129.3, 129.0, 128.6, 127.6, 127.5, 126.4, 126.0, 123.7, 123.0, 122.9, 119.2, 112.1, 85.1, 55.0, 54.6, 53.9, 45.5, 41.0, 40.6, 27.3, 25.9, 25.7, 24.3, 23.4. HRMS (ESI)  $m/z$ :  $[M + H]^+$  Calcd for  $C_{38}H_{42}^{35}Cl_2N_3O$  626.2699; found 626.2701;  $[M + H]^+$  Calcd for  $C_{38}H_{42}^{35}Cl^{37}ClN_3O$  628.2670; found 628.2686.

**12-(5-Methyl-2-(piperidin-1-yl)phenyl)-8-(4-methyl-2-(pyrrolidin-1-ylmethyl)phenyl)-7a,8,10,11,11a,12-hexahydro-9H-benzo[5,6]chromeno[2,3-b]pyridine (4y).** Yellow solid (201.9 mg, 69%), mp 91 - 92 °C.  $^1H$  NMR (400 MHz,  $CDCl_3$ )  $\delta$  7.77 - 7.62 (m, 2H), 7.68 (d,  $J = 8.8$  Hz, 1H), 7.57 (d,  $J = 8.1$  Hz, 1H), 7.47 - 7.37 (m, 2H), 7.31 - 7.05 (m, 5H), 6.92 (d,  $J = 8.0$  Hz, 1H), 6.33 (s, 1H), 4.88 (s, 1H), 4.77 (s, 1H), 3.67 - 2.67 (m, 8H), 2.58 - 2.19 (m, 8H), 2.08 - 1.51 (m, 17H).  $^{13}C$  NMR (101 MHz,  $CDCl_3$ )  $\delta$  153.0, 149.4, 147.5, 141.8, 135.0, 133.8, 133.4, 131.2, 130.0, 129.4, 129.0, 128.5, 128.4, 127.9, 126.2, 125.2, 123.3, 122.8, 122.0, 119.2, 113.1, 85.7, 55.1, 54.0, 53.6, 45.9, 41.5, 40.7, 29.7, 27.4, 26.1, 25.6, 24.4, 23.3, 21.1, 21.0. HRMS (ESI)  $m/z$ :  $[M + H]^+$  Calcd for  $C_{40}H_{48}N_3O$  586.3792; found 586.3790.

**12-(5-Methoxy-2-(piperidin-1-yl)phenyl)-8-(4-methoxy-2-(pyrrolidin-1-ylmethyl)phenyl)-7a,8,10,11,11a,12-hexahydro-9H-benzo[5,6]chromeno[2,3-b]pyridine (4z).** Purified by column chromatography using petroleum ether/ethyl acetate/ $Et_3N$  (35:1:0.04) as eluent, yellow solid (172.8 mg, 56%), mp 65 - 66 °C.  $^1H$  NMR (400 MHz,  $CDCl_3$ )  $\delta$  7.74 - 7.57 (m, 3H), 7.40 (d,  $J = 8.0$  Hz, 1H), 7.30

– 7.11 (m, 4H), 7.06 (s, 1H), 6.83 (dd,  $J = 8.8, 3.1$  Hz, 1H), 6.63 (dd,  $J = 8.6, 3.0$  Hz, 1H), 6.12 (d,  $J = 3.0$  Hz, 1H), 4.92 (s, 1H), 4.79 (s, 1H), 3.79 (s, 3H), 3.62 – 2.69 (m, 11H), 2.45–2.25 (m, 5H), 1.93 – 1.44 (m, 14H).  $^{13}\text{C}$  NMR (101 MHz,  $\text{CDCl}_3$ )  $\delta$  156.9, 156.2, 153.2, 145.2, 143.8, 143.0, 135.2, 133.4, 129.4, 128.6, 128.5, 126.5, 126.2, 123.2, 123.1, 122.7, 119.3, 116.4, 115.0, 113.2, 112.9, 110.6, 85.8, 55.6, 55.0, 54.8, 53.8, 46.1, 41.3, 40.8, 29.8, 27.5, 26.1, 25.7, 24.4, 23.4. HRMS (ESI)  $m/z$ :  $[\text{M} + \text{H}]^+$  Calcd for  $\text{C}_{40}\text{H}_{48}\text{N}_3\text{O}_3$  618.3690; found 618.3685.

**4-(12-(5-Cyano-2-(piperidin-1-yl)phenyl)-10,11,11a,12-tetrahydro-9H-benzo[5,6]chromeno[2,3-b]pyridin-8(7aH)-yl)-3-(pyrrolidin-1-ylmethyl)benzoxonitrile (4aa).** Yellow solid (188.2 mg, 62%), mp 152 - 154 °C.  $^1\text{H}$  NMR (400 MHz,  $\text{CDCl}_3$ )  $\delta$  7.82 – 7.70 (m, 3H), 7.62 – 7.54 (m, 2H), 7.46 (dd,  $J = 8.2, 2.0$  Hz, 1H), 7.36 – 7.26 (m, 4H), 7.16 (d,  $J = 8.9$  Hz, 1H), 6.89 (d,  $J = 2.0$  Hz, 1H), 4.90 (s, 1H), 4.70 (s, 1H), 3.64 – 2.90 (m, 8H), 2.51 – 2.18 (m, 5H), 1.99 – 1.59 (m, 14H).  $^{13}\text{C}$  NMR (101 MHz,  $\text{CDCl}_3$ )  $\delta$  156.2, 153.6, 152.6, 142.5, 134.5, 134.2, 133.3, 132.8, 131.8, 131.6, 129.7, 129.6, 128.9, 126.7, 123.9, 123.4, 122.7, 122.5, 119.4, 119.0, 111.4, 107.5, 107.3, 84.4, 54.6, 54.5, 54.1, 45.2, 40.6, 40.3, 27.0, 25.7, 25.6, 24.2, 23.5. HRMS (ESI)  $m/z$ :  $[\text{M} + \text{H}]^+$  Calcd for  $\text{C}_{40}\text{H}_{42}\text{N}_5\text{O}$  608.3384; found 608.3378.

**13-(2-(Azepan-1-yl)phenyl)-8-(2-(pyrrolidin-1-ylmethyl)phenyl)-7a,8,9,10,11,12,12a,13-octahydrobenzo[5,6]chromeno[2,3-b]azepine (4ab).** Purified by column chromatography using petroleum ether/ethyl acetate/ $\text{Et}_3\text{N}$  (35:1:0.04) as eluent, yellow solid (117.2 mg, 40%), mp 59 - 60 °C.  $^1\text{H}$  NMR (400 MHz,  $\text{CDCl}_3$ )  $\delta$  7.66 (t,  $J = 8.0$  Hz, 2H), 7.52 (s, 1H), 7.40 (d,  $J = 7.4$  Hz, 2H), 7.32 – 7.16 (m, 5H), 7.11 (t,  $J = 7.6$  Hz, 2H), 6.74 (t,  $J = 7.5$  Hz, 1H), 6.57 (d,  $J = 7.7$  Hz, 1H), 4.98 (s, 1H), 4.80 (s, 1H), 3.51 – 2.81 (m, 8H), 2.60 – 2.18 (m, 9H), 2.18– 1.48 (m, 14H).  $^{13}\text{C}$  NMR (101 MHz,  $\text{CDCl}_3$ )  $\delta$  154.4, 152.5, 148.6, 148.5, 141.5, 133.4, 131.2, 129.6, 128.5, 128.4, 127.5, 126.3, 124.5, 124.3, 123.8, 123.1, 123.0, 118.9, 115.7, 115.5, 114.1, 109.8, 91.4, 58.6, 58.2, 53.4, 53.3, 50.6, 43.6, 41.8, 38.5, 30.6, 29.8, 29.0, 27.6, 27.2, 26.3, 23.7, 23.6, 23.4. HRMS (ESI)  $m/z$ :  $[\text{M} + \text{H}]^+$  Calcd for  $\text{C}_{40}\text{H}_{48}\text{N}_3\text{O}$  586.3792; found 586.3788.

**14-(2-(Azocan-1-yl)phenyl)-8-(2-(pyrrolidin-1-ylmethyl)phenyl)-8,9,10,11,12,13,13a,14-octahydro-7aH-benzo[5,6]chromeno[2,3-b]azocine (4ac).** Purified by column chromatography using petroleum ether/ethyl acetate/ $\text{Et}_3\text{N}$  (35:1:0.04) as eluent, yellow oil (89.0 mg, 29%).  $^1\text{H}$  NMR (400 MHz,  $\text{CDCl}_3$ )  $\delta$  7.79–7.74 (m, 1H), 7.71 (d,  $J = 8.8$  Hz, 1H), 7.45–7.44 (m, 1H), 7.37 (d,  $J = 8.0$  Hz, 1H), 7.23–7.12 (m, 4H), 6.97 (d,  $J = 7.2$  Hz, 1H), 6.84 (t,  $J = 7.2$  Hz, 1H), 6.69 (d,  $J = 7.6$  Hz, 1H), 6.58 (t,  $J = 7.6$  Hz, 3H), 5.08 (s, 1H), 4.29 (s, 1H), 3.58 (d,  $J = 11.2$  Hz, 2H), 3.50–3.39 (m, 2H), 3.30–3.22 (m, 2H), 3.08 (t,  $J = 6.8$  Hz, 2H), 2.76–2.75 (m, 2H), 2.56 (d,  $J = 5.2$  Hz, 2H), 2.43–2.37 (m, 6H), 1.92–1.79 (m, 17H).  $^{13}\text{C}$  NMR (100 MHz,  $\text{CDCl}_3$ )  $\delta$  153.9, 152.4, 148.5, 141.6, 133.3, 131.2, 129.5, 129.1, 128.43, 128.42, 128.2, 127.2, 126.2, 125.8, 124.1, 123.0, 122.8, 118.8, 115.4, 115.3, 114.1, 109.5, 91.3, 59.7, 57.9, 55.5, 53.4, 53.3, 50.6, 43.1, 41.3, 38.9, 29.4, 28.3, 28.0, 27.9, 27.5, 26.8, 26.5, 23.63, 23.57, 23.3. HRMS (ESI)  $m/z$ :  $[\text{M} + \text{H}]^+$  Calcd for  $\text{C}_{42}\text{H}_{52}\text{N}_3\text{O}$  614.4105; found 614.4102.

**12-(2-(Piperidin-1-yl)phenyl)-8-(2-(piperidin-1-ylmethyl)phenyl)-7a,8,10,11,11a,12-hexahydro-9H-benzo[5,6]chromeno[2,3-b]pyridine (4ad).** Yellow solid (228.4 mg, 80%), mp 150 - 151 °C.  $^1\text{H}$  NMR (400 MHz,  $\text{CDCl}_3$ )  $\delta$  7.75 – 7.60 (m, 3H), 7.65 (t,  $J = 8.0$  Hz, 2H), 7.42 (t,  $J = 8.2$  Hz, 2H), 7.31 – 7.14 (m, 5H), 6.73 (t,  $J = 7.4$  Hz, 1H), 6.57 (d,  $J = 7.8$  Hz, 1H), 4.95 (s, 1H), 4.81 (s, 1H), 3.62 – 2.76 (m, 8H), 2.57 – 1.59 (m, 15H), 1.39 – 1.26 (m, 6H).  $^{13}\text{C}$  NMR (101 MHz,  $\text{CDCl}_3$ )  $\delta$  153.2, 151.9, 150.4, 141.9, 134.0, 133.4, 130.4, 129.6, 129.4, 128.5, 128.4, 127.3, 127.2, 126.2, 124.8, 124.5, 124.5, 123.2, 122.7, 122.2, 119.3, 113.2, 85.5, 58.2, 55.0, 54.4, 45.7, 41.0, 40.7, 29.7, 27.4, 26.0, 25.9, 25.8, 24.5, 24.3. HRMS (ESI)  $m/z$ :  $[\text{M} + \text{H}]^+$  Calcd for  $\text{C}_{39}\text{H}_{46}\text{N}_3\text{O}$  572.3635; found 572.3627.

**8-(2-(Azepan-1-ylmethyl)phenyl)-12-(2-(piperidin-1-yl)phenyl)-7a,8,10,11,11a,12-hexahydro-9H-benzo[5,6]chromeno[2,3-b]pyridine (4ae).** Yellow solid (222.3 mg, 76%), mp 108 - 109 °C. <sup>1</sup>H NMR (400 MHz, CDCl<sub>3</sub>) δ 7.77 - 7.51 (m, 4H), 7.43 (d, *J* = 7.8 Hz, 1H), 7.33 - 7.18 (m, 4H), 7.18 - 7.07 (m, 3H), 6.75 (t, *J* = 7.6 Hz, 1H), 6.57 (d, *J* = 7.7 Hz, 1H), 4.93 (s, 1H), 4.81 (s, 1H), 3.69 - 2.76 (m, 8H), 2.55 - 2.32 (m, 5H), 1.99 - 1.50 (m, 18H). <sup>13</sup>C NMR (101 MHz, CDCl<sub>3</sub>) δ 153.1, 151.9, 150.2, 142.0, 133.3, 130.6, 129.5, 129.4, 128.6, 128.5, 127.7, 127.2, 126.2, 124.7, 124.6, 124.5, 123.3, 122.8, 122.2, 119.2, 113.1, 85.5, 55.9, 55.1, 45.7, 41.3, 40.7, 29.7, 27.4, 27.1, 26.9, 26.1, 25.8, 24.5. HRMS (ESI) *m/z*: [M + H]<sup>+</sup> Calcd for C<sub>40</sub>H<sub>48</sub>N<sub>3</sub>O 586.3792; found 586.3796.

***N,N*-Dimethyl-1-(2-(12-(2-(piperidin-1-yl)phenyl)-10,11,11a,12-tetrahydro-9H-benzo[5,6]chromeno[2,3-b]pyridin-8(7aH)-yl)phenyl)methanamine (4af).** Yellow solid (228.4 mg, 86%), mp 72 - 73 °C. <sup>1</sup>H NMR (400 MHz, CDCl<sub>3</sub>) δ 7.75 - 7.57 (m, 3H), 7.48 - 7.34 (m, 2H), 7.35 - 7.07 (m, 7H), 6.74 (t, *J* = 7.5 Hz, 1H), 6.57 (d, *J* = 7.7 Hz, 1H), 5.08 (s, 1H), 4.81 (s, 1H), 3.79 - 2.28 (m, 9H), 2.00 - 1.58 (m, 16H). <sup>13</sup>C NMR (101 MHz, CDCl<sub>3</sub>) δ 153.1, 151.9, 150.5, 141.9, 133.4, 130.7, 129.7, 129.4, 128.5, 128.5 (2), 127.9, 127.2, 126.2, 124.8, 124.6, 124.4, 123.3, 122.7, 122.1, 119.3, 113.2, 85.7, 58.7, 55.0, 45.4, 44.8, 41.1, 40.7, 32.0, 29.8, 27.4, 26.1, 25.79, 24.5. HRMS (ESI) *m/z*: [M + H]<sup>+</sup> Calcd for C<sub>36</sub>H<sub>42</sub>N<sub>3</sub>O 532.3322; found 532.3319.

***N*-Ethyl-*N*-(2-(12-(2-(piperidin-1-yl)phenyl)-10,11,11a,12-tetrahydro-9H-benzo[5,6]chromeno[2,3-b]pyridin-8(7aH)-yl)benzyl)ethanamine (4ag).** Yellow solid (246.0 mg, 88%), mp 224-225 °C. <sup>1</sup>H NMR (400 MHz, CDCl<sub>3</sub>) δ 7.71 (d, *J* = 8.5 Hz, 1H), 7.66 (d, *J* = 8.9 Hz, 1H), 7.54 (t, *J* = 9.8 Hz, 2H), 7.43 (d, *J* = 7.9 Hz, 1H), 7.30 - 7.19 (m, 4H), 7.18 - 7.05 (m, 3H), 6.75 (t, *J* = 7.4 Hz, 1H), 6.55 (d, *J* = 7.6 Hz, 1H), 4.91 (s, 1H), 4.79 (s, 1H), 3.71 - 2.71 (m, 8H), 2.54 - 1.60 (m, 15H), 0.83 (t, *J* = 7.1 Hz, 6H). <sup>13</sup>C NMR (101 MHz, CDCl<sub>3</sub>) δ 153.0, 151.9, 150.1, 141.9, 133.3, 130.5, 129.6, 129.4, 128.6, 128.5, 127.3, 126.2, 124.8, 124.5, 124.2, 123.2, 122.8, 122.2, 119.2, 113.0, 85.5, 77.3, 55.0, 51.2, 46.5, 45.6, 41.3, 40.8, 27.4, 26.0, 25.6, 24.4, 10.6. HRMS (ESI) *m/z*: [M + H]<sup>+</sup> Calcd for C<sub>38</sub>H<sub>46</sub>N<sub>3</sub>O 560.3635; found 560.3626.

***N*-(2-(12-(2-(Piperidin-1-yl)phenyl)-10,11,11a,12-tetrahydro-9H-benzo[5,6]chromeno[2,3-b]pyridin-8(7aH)-yl)benzyl)-*N*-propylpropan-1-amine (4ah).** Yellow solid (258.3 mg, 88%), mp 140 - 141 °C. <sup>1</sup>H NMR (400 MHz, CDCl<sub>3</sub>) δ 7.75 - 7.68 (m, 1H), 7.66 (d, *J* = 8.9 Hz, 1H), 7.58 - 7.48 (m, 2H), 7.43 (d, *J* = 9.3 Hz, 1H), 7.30 - 7.16 (m, 4H), 7.17 - 7.06 (m, 3H), 6.75 (t, *J* = 7.5 Hz, 1H), 6.55 (d, *J* = 7.8 Hz, 1H), 4.90 (s, 1H), 4.79 (s, 1H), 3.69 - 2.75 (m, 8H), 2.52- 1.53 (m, 14H), 1.41 - 1.15 (m, 5H), 0.75 (t, *J* = 7.3 Hz, 6H). <sup>13</sup>C NMR (101 MHz, CDCl<sub>3</sub>) δ 153.2, 151.9, 149.9, 141.9, 133.4, 129.8, 129.6, 129.4, 128.5, 128.4, 127.2, 126.7, 126.2, 124.5, 124.1, 123.4, 123.2, 122.7, 122.2, 119.3, 113.1, 85.5, 56.0, 55.0, 52.9, 45.1, 41.0, 40.8, 27.4, 26.0, 25.7, 24.5, 19.8, 11.9. HRMS (ESI) *m/z*: [M + H]<sup>+</sup> Calcd for C<sub>40</sub>H<sub>50</sub>N<sub>3</sub>O 588.3948; found 588.3951.

***N*-Isopropyl-*N*-(2-(12-(2-(piperidin-1-yl)phenyl)-10,11,11a,12-tetrahydro-9H-benzo[5,6]chromeno[2,3-b]pyridin-8(7aH)-yl)benzyl)propan-2-amine (4ai).** Yellow solid (229.0 mg, 78%), mp 174-175 °C. <sup>1</sup>H NMR (400 MHz, CDCl<sub>3</sub>) δ 7.44 (d, *J* = 8.8 Hz, 1H), 7.66 (d, *J* = 8.8 Hz, 1H), 7.61 (d, *J* = 7.7 Hz, 1H), 7.49 - 7.37 (m, 2H), 7.30 - 7.16 (m, 4H), 7.30 - 7.04 (m, 3H), 6.76 (t, *J* = 7.5 Hz, 1H), 6.56 (d, *J* = 7.2 Hz, 1H), 4.88 (s, 1H), 4.80 (s, 1H), 3.78 - 2.40 (m, 11H), 2.01 - 1.63 (m, 10H), 0.83 (d, *J* = 6.5 Hz, 6H), 0.75 (d, *J* = 6.6 Hz, 6H). <sup>13</sup>C NMR (101 MHz, CDCl<sub>3</sub>) δ 153.3, 151.9, 149.2, 141.9, 137.9, 133.3, 129.5, 129.4, 129.3, 128.4, 127.3, 126.1, 126.0, 124.5, 124.0, 123.2, 123.1, 122.7, 122.4, 119.3, 113.0, 85.4, 48.3, 45.0, 42.9, 41.0, 40.8, 27.4, 26.1, 25.9, 24.5, 21.1, 20.0. HRMS (ESI) *m/z*: [M + H]<sup>+</sup> Calcd for C<sub>40</sub>H<sub>50</sub>N<sub>3</sub>O 588.3948; found 588.3942.

***N*-Methyl-*N*-(2-(12-(2-(piperidin-1-yl)phenyl)-10,11,11a,12-tetrahydro-9*H*-benzo[5,6]chromeno[2,3-*b*]pyridin-8(7*aH*)-yl)benzyl)ethanamine (4*aj*)**. Yellow solid (188.4 mg, 69%), mp 124 - 125 °C. <sup>1</sup>H NMR (400 MHz, CDCl<sub>3</sub>) δ 7.75 – 7.64 (m, 2H), 7.62 (d, *J* = 8.1 Hz, 1H), 7.54 (d, *J* = 7.6 Hz, 1H), 7.48 – 7.39 (m, 1H), 7.35 – 7.18 (m, 4H), 7.19 – 7.08 (m, 3H), 6.75 (t, *J* = 7.4 Hz, 1H), 6.56 (dd, *J* = 7.7, 1.6 Hz, 1H), 4.92 (s, 1H), 4.80 (s, 1H), 3.69 – 2.73 (m, 8H), 2.5 – 2.16 (m, 3H), 2.01 (s, 3H), 1.94 – 1.59 (m, 10H), 0.93 (t, *J* = 7.2 Hz, 3H). <sup>13</sup>C NMR (101 MHz, CDCl<sub>3</sub>) δ 153.0, 151.9, 150.3, 141.9, 133.3, 130.7, 129.6, 129.4, 128.6, 128.5, 128.1, 127.3, 126.3, 125.0, 124.8, 124.5, 123.2, 122.8, 122.1, 119.2, 113.1, 85.6, 55.3, 55.0, 50.7, 45.6, 41.3, 40.8, 27.4, 26.0, 25.7, 24.4, 11.1. HRMS (ESI) *m/z*: [M + H]<sup>+</sup> Calcd for C<sub>37</sub>H<sub>44</sub>N<sub>3</sub>O 546.3479; found 546.3483.

***N*-Ethyl-*N*-(2-(12-(2-(piperidin-1-yl)phenyl)-10,11,11a,12-tetrahydro-9*H*-benzo[5,6]chromeno[2,3-*b*]pyridin-8(7*aH*)-yl)benzyl)propan-1-amine (4*ak*)**. Purified by column chromatography using petroleum ether/ethyl acetate/Et<sub>3</sub>N (35:1:0.04) as eluent, yellow solid (212.0 mg, 74%), mp 57 - 58 °C. <sup>1</sup>H NMR (400 MHz, CDCl<sub>3</sub>) δ 7.71 (d, *J* = 6.9 Hz, 1H), 7.65 (d, *J* = 8.9 Hz, 1H), 7.58–7.17 (m, 2H), 7.44 (d, *J* = 8.2 Hz, 1H), 7.29 – 7.17 (m, 4H), 7.17 – 7.07 (m, 3H), 6.75 (t, *J* = 7.4 Hz, 1H), 6.56 (d, *J* = 7.7 Hz, 1H), 4.91 (s, 1H), 4.79 (s, 1H), 3.68 – 2.69 (m, 8H), 2.59 – 2.03 (m, 5H), 2.01 – 1.16 (m, 12H), 0.86 – 0.71 (m, 6H). <sup>13</sup>C NMR (101 MHz, CDCl<sub>3</sub>) δ 153.2, 152.0, 150.0, 142.0, 134.6, 133.4, 130.0, 129.7, 129.5, 128.6, 128.5, 127.3, 127.0, 126.3, 124.5, 124.3, 123.7, 123.3, 122.8, 122.2, 119.3, 113.1, 85.6, 55.4, 55.0, 52.3, 47.4, 45.3, 41.1, 40.9, 27.5, 26.1, 25.8, 24.5, 19.7, 12.0, 11.3. HRMS (ESI) *m/z*: [M + H]<sup>+</sup> Calcd for C<sub>39</sub>H<sub>48</sub>N<sub>3</sub>O 574.3792; found 574.3786.

***N*-Methyl-*N*-(2-(14-(2-(piperidin-1-yl)phenyl)-12,13,13a,14-tetrahydro-11*H*-dibenzo[5,6:7,8]chromeno[2,3-*b*]pyridin-10(9*aH*)-yl)benzyl)propan-2-amine (4*al*)**. Yellow solid (231.4 mg, 76%), mp 150 - 151 °C. <sup>1</sup>H NMR (400 MHz, CDCl<sub>3</sub>) δ 7.77 – 7.54 (m, 4H), 7.42 (d, *J* = 9.0 Hz, 1H), 7.33 – 7.06 (m, 7H), 6.76 (t, *J* = 7.5 Hz, 1H), 6.56 (d, *J* = 8.1 Hz, 1H), 4.89 (s, 1H), 4.80 (s, 1H), 3.69 – 2.30 (m, 10H), 2.09 – 1.46 (m, 13H), 1.05 – 0.69 (m, 6H). <sup>13</sup>C NMR (101 MHz, CDCl<sub>3</sub>) δ 153.1, 151.9, 150.1, 142.0, 133.3, 130.3, 129.5, 129.4, 128.6, 128.5, 127.6, 127.3, 126.2, 124.8, 124.5, 124.2, 123.3, 122.8, 122.2, 119.3, 113.0, 85.5, 55.0, 53.2, 51.3, 45.5, 41.4, 40.8, 36.2, 27.4, 26.0, 25.7, 24.5, 17.9, 16.7. HRMS (ESI) *m/z*: [M + H]<sup>+</sup> Calcd for C<sub>38</sub>H<sub>46</sub>N<sub>3</sub>O 560.3635; found 560.3630.

***N*-Ethyl-*N*-(2-(12-(2-(piperidin-1-yl)phenyl)-10,11,11a,12-tetrahydro-9*H*-benzo[5,6]chromeno[2,3-*b*]pyridin-8(7*aH*)-yl)benzyl)propan-2-amine (4*am*)**. Yellow solid (180.5 mg, 63%), mp 140 - 141 °C. <sup>1</sup>H NMR (400 MHz, CDCl<sub>3</sub>) δ 7.72 (d, *J* = 6.9 Hz, 2H), 7.66 (d, *J* = 8.9 Hz, 1H), 7.54 (d, *J* = 7.8 Hz, 1H), 7.41 (d, *J* = 9.0 Hz, 1H), 7.33 – 7.06 (m, 7H), 6.76 (t, *J* = 7.5 Hz, 1H), 6.56 (d, *J* = 8.1 Hz, 1H), 4.89 (s, 1H), 4.80 (s, 1H), 3.74 – 2.65 (m, 10H), 2.50 – 1.56 (m, 13H), 1.05 – 0.69 (m, 9H). <sup>13</sup>C NMR (101 MHz, CDCl<sub>3</sub>) δ 153.1, 151.9, 149.8, 142.0, 133.3, 129.5, 129.5, 128.6, 128.5, 127.4, 126.3, 124.5, 123.2, 122.8, 122.3, 119.2, 112.9, 85.5, 55.0, 47.0, 45.4, 43.8, 41.4, 40.8, 27.4, 26.1, 25.6, 24.4, 16.7. HRMS (ESI) *m/z*: [M + H]<sup>+</sup> Calcd for C<sub>39</sub>H<sub>48</sub>N<sub>3</sub>O 574.3792; found 574.3790.

***N*-Methyl-*N*-(2-(12-(2-(piperidin-1-yl)phenyl)-10,11,11a,12-tetrahydro-9*H*-benzo[5,6]chromeno[2,3-*b*]pyridin-8(7*aH*)-yl)benzyl)butan-1-amine (4*an*)**. Yellow solid (226.4 mg, 79%), mp 136 - 137 °C. <sup>1</sup>H NMR (400 MHz, CDCl<sub>3</sub>) δ 7.73 – 7.61 (m, 2H), 7.59 – 7.51 (m, 1H), 7.48 – 7.37 (m, 2H), 7.30 – 7.16 (m, 4H), 7.16 – 7.04 (m, 3H), 6.74 (t, *J* = 7.6 Hz, 1H), 6.60 – 6.53 (m, 1H), 4.98 (s, 1H), 4.80 (s, 1H), 3.71 – 2.71 (m, 8H), 2.54 – 1.53 (m, 16H), 1.38 – 1.12 (m, 4H), 0.87 – 0.77 (m, 3H). <sup>13</sup>C NMR (101 MHz, CDCl<sub>3</sub>) δ 153.2, 152.0, 150.2, 142.0, 133.8, 133.4, 130.3, 129.7, 129.4, 128.6, 128.5, 127.4, 127.3, 126.2, 124.5, 124.4, 124.1, 123.3, 122.8, 122.2, 119.3, 113.2, 85.65, 57.3, 56.6, 55.0, 45.4, 42.0, 41.1, 40.8, 28.9, 27.4, 26.1, 25.8, 24.5, 20.7, 14.2. HRMS (ESI) *m/z*: [M + H]<sup>+</sup> Calcd for C<sub>39</sub>H<sub>48</sub>N<sub>3</sub>O 574.3792; found 574.3784.

***N*-Benzyl-*N*-methyl-1-(2-(12-(2-(piperidin-1-yl)phenyl)-10,11,11a,12-tetrahydro-9H-benzo[5,6]chromeno[2,3-*b*]pyridin-8(7aH)-yl)phenyl)methanamine (4ao).** Yellow solid (282.3 mg, 93%), mp 62 - 63 °C. <sup>1</sup>H NMR (400 MHz, CDCl<sub>3</sub>) δ 7.77–7.62 (m, 2H), 7.61–7.50 (m, 2H), 7.48–7.40 (m, 1H), 7.36–7.05 (m, 12H), 6.70 (s, 1H), 6.56 (s, 1H), 4.98 (s, 1H), 4.80 (s, 1H), 3.68–2.79 (m, 11H), 2.50–2.30 (m, 1H), 1.99–1.61 (m, 12H). <sup>13</sup>C NMR (101 MHz, CDCl<sub>3</sub>) δ 153.0, 151.9, 149.9, 141.9, 133.3, 130.5, 129.6, 129.4, 128.6, 128.5, 127.9, 127.3, 126.2, 124.9, 124.7, 124.5, 123.2, 122.8, 122.1, 119.2, 113.1, 85.5, 62.3, 61.3, 58.6, 56.2, 55.0, 45.3, 42.4, 42.1, 41.7, 41.1, 40.8, 27.5, 26.0, 25.8, 24.5. HRMS (ESI) m/z: [M + H]<sup>+</sup> Calcd for C<sub>42</sub>H<sub>46</sub>N<sub>3</sub>O 608.3635; found 608.3634.

## References

1. Wang, S.; Shen, Y.-B.; Li, L.-F.; Qiu, B.; Yu, L.; Liu, Q.; Xiao, J., N-Alkylation-Initiated Redox-Neutral [5 + 2] Annulation of 3-Alkylindoles with o-Aminobenzaldehydes: Access to Indole-1,2-Fused 1,4-Benzodiazepines. *Org. Lett.* **2019**, *21*, 8904-8908.
2. Glukhareva, T. V.; Kropotina, P. E.; Kosterina, M. F.; Nein, Y. I.; Deeva, E. V.; Morzherin, Y. Y., Stereoselective synthesis of new spiro-fused heterocyclic systems, 2,3,4,4a,5,6-hexahydro-6H- spiro[benzo[c]quinolizine-5,4'-pyrazol]-5'-ones. *Chem. Heterocycl. Comp.* **2007**, *43*, 76-81.
3. Chen, Y.; Cheng, F.-B.; Wu, X.-R.; Zhu, W.; Liao, J.-W.; Jiang, Y.; Zhang, C.; Niu, W.-Y.; Yu, Y.; Duan, H.-Q.; Qin, N., Flavonoid derivatives synthesis and anti-diabetic activities. *Bioorg. Chem.* **2020**, *95*, 103501.
4. Baleeva, N. S.; Smirnov, A. Y.; Zaitseva, E. R.; Ivanov, D. S.; Sokolov, A. I.; Mikhaylov, A. A.; Myasnyanko, I. N.; Baranov, M. S., Photoinduced [1,5]-hydride shift triggered cyclization. *New J. Chem.* **2023**, *47*, 12536-12540.
5. Skowronska-Ptasinska, M. D. D.; Verboom, W.; Reinhoudt, D. N. J. J. o. O. C., Effect of different dialkylamino groups on the regioselectivity of lithiation of O-protected 3-(dialkylamino)phenols. *Org. Chem.* **1985**, *50*, 2690-2698.
6. Guo, M.; Dong, F.; Yin, X.; Xu, L.; Wang, L.; Li, S.-S., Facile syntheses of tetrahydroquinolines and 1,2-dihydroquinolines via vinylogous cascade hydride transfer/cyclization. *Org. Chem. Front.* **2021**, *8*, 2224-2231.
7. Liu, S.-Y.; Zhao, T.; Qu, J.-P.; Wang, B.-M., Expedient Synthesis of 1,4-Benzodiazepines via a Tandem Condensation/ [1,5] -Hydride Transfer/Cyclization Process. *Adv. Synth. Catal.* **2018**, *360*, 4094-4098.

**Figure S1** High resolution mass spectrum of intermediate **A or B or C**

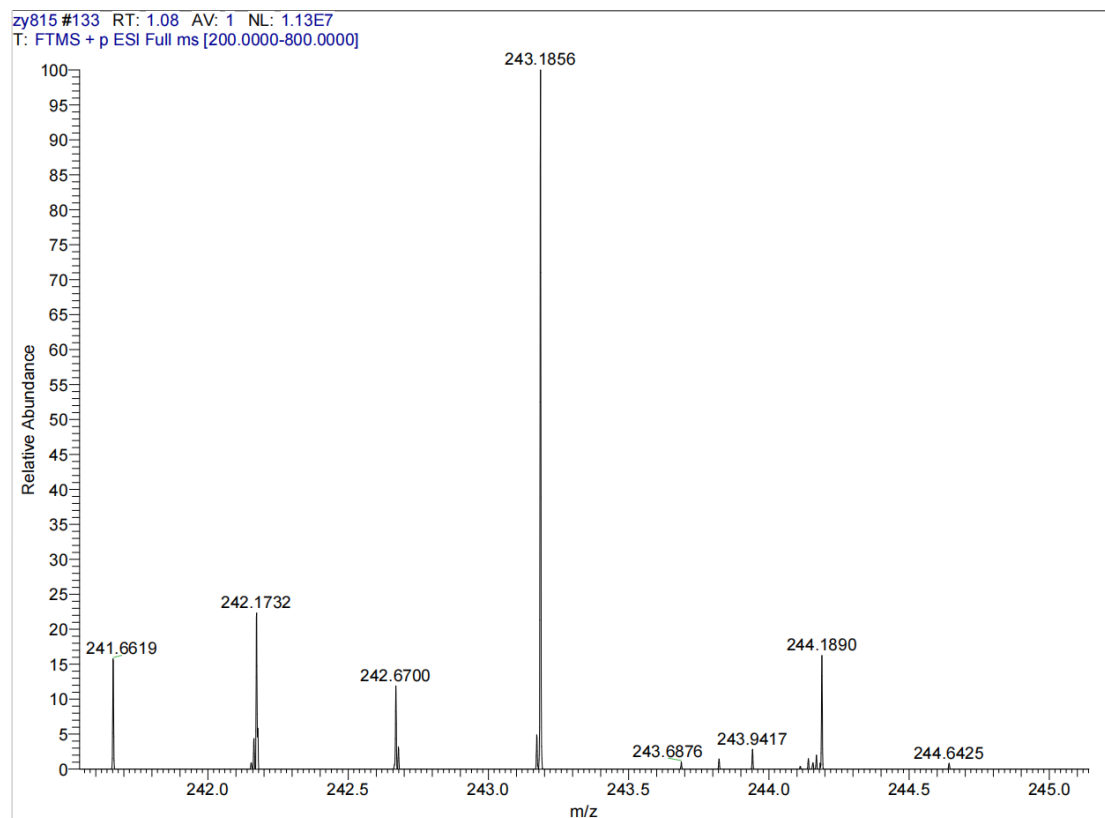

**Figure S2** High resolution mass spectrum of intermediate **D**

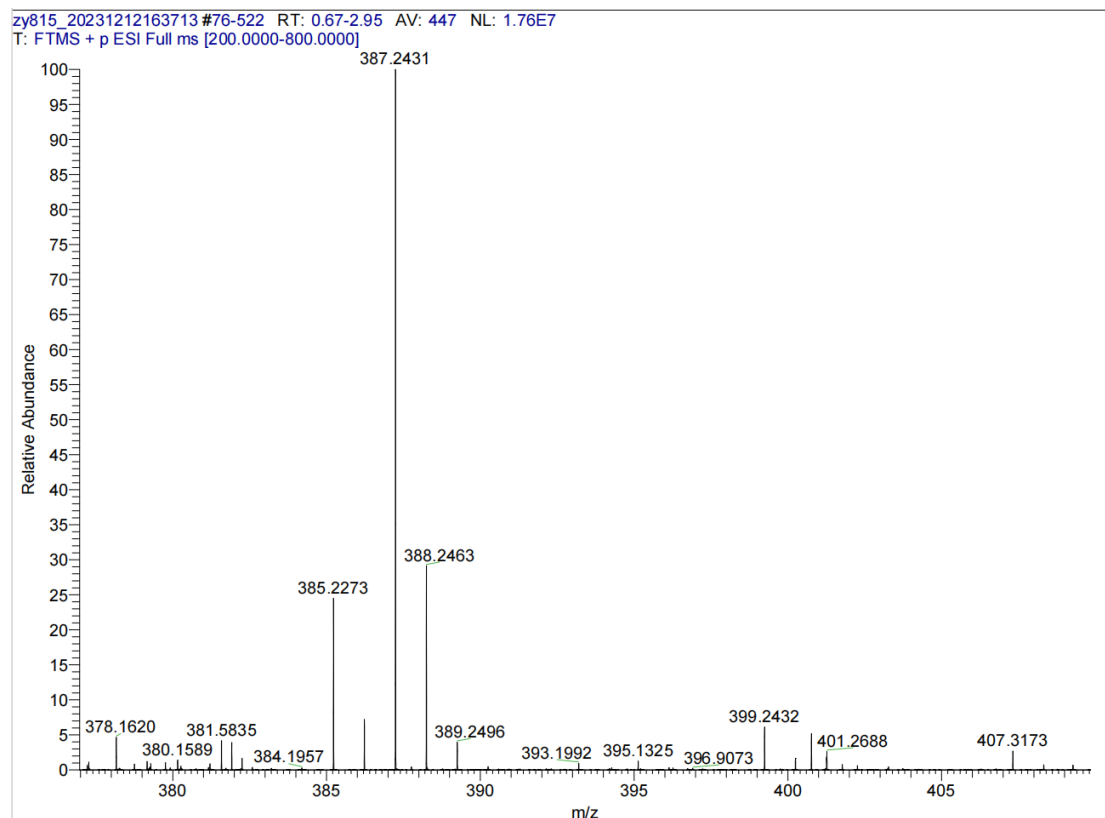



**Figure S3** High resolution mass spectrum of intermediate **E**

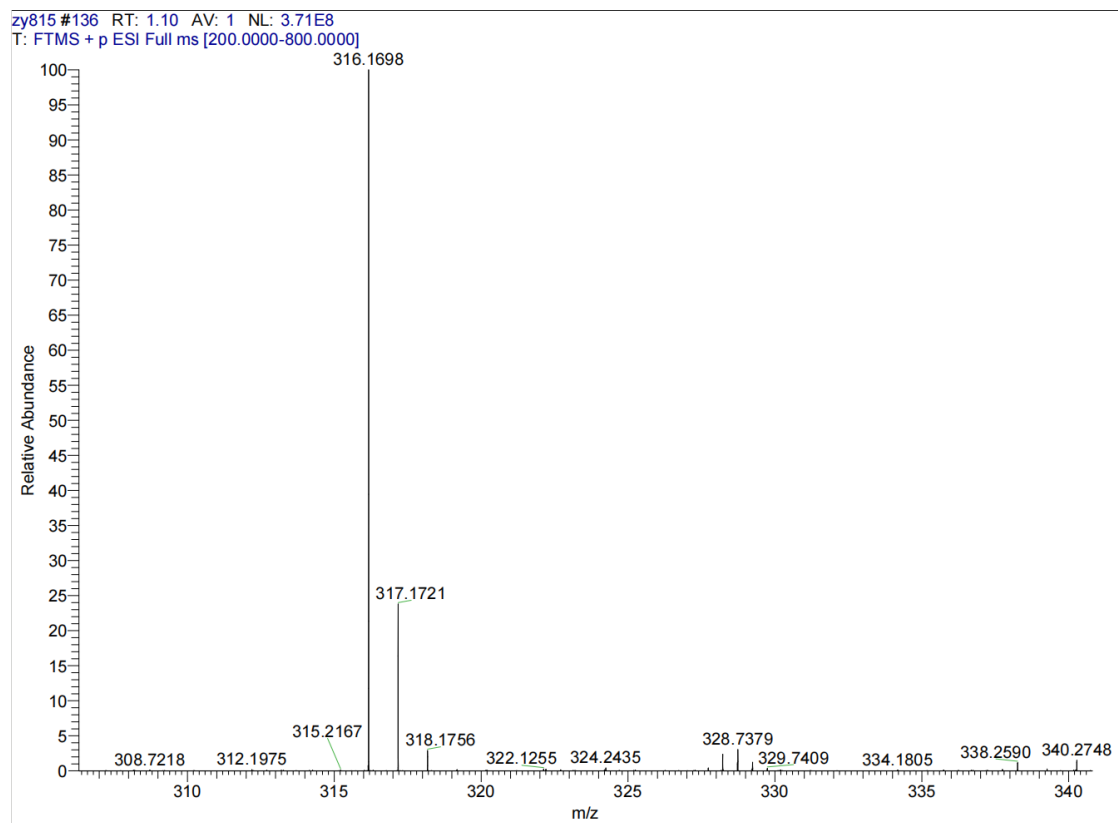

## Crystal Data

The crystal of **4a** was obtained from ethyl acetate/petroleum ether at room temperature. The structure of compound **4a** was assigned by single crystal X-ray analysis. Diffraction data were collected on a Bruker Smart Apex II CCD diffractometer with graphite-monochromated Mo K $\alpha$  ( $\lambda = 0.71073$  Å). The crystal data of compound **4a** have been deposited in CCDC with number 2306808.

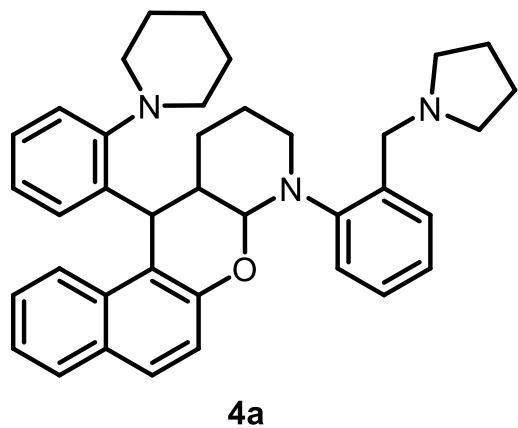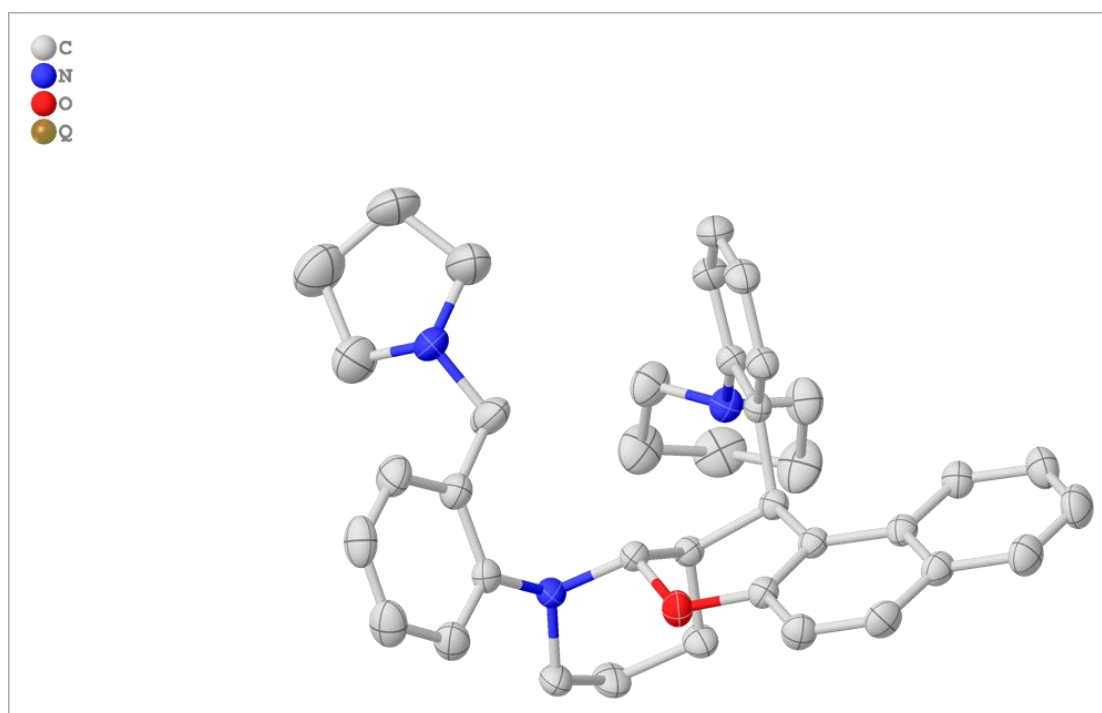

**Figure S1** X-ray structure of compound **4a** (CCDC 2306808) (Thermal ellipsoids are drawn at the 50% probability level).

**Table S1 Crystal data and structure refinement for 4a.**

|                                             |                                                               |
|---------------------------------------------|---------------------------------------------------------------|
| Identification code                         | <b>4a</b>                                                     |
| Empirical formula                           | C <sub>38</sub> H <sub>43</sub> N <sub>3</sub> O              |
| Formula weight                              | 557.785                                                       |
| Temperature/K                               | 296.15                                                        |
| Crystal system                              | monoclinic                                                    |
| Space group                                 | P2 <sub>1</sub> /n                                            |
| a/Å                                         | 13.2032(10)                                                   |
| b/Å                                         | 16.3569(13)                                                   |
| c/Å                                         | 14.4981(11)                                                   |
| α/°                                         | 90                                                            |
| β/°                                         | 93.013(2)                                                     |
| γ/°                                         | 90                                                            |
| Volume/Å <sup>3</sup>                       | 3126.7(4)                                                     |
| Z                                           | 4                                                             |
| ρ <sub>calc</sub> /g/cm <sup>3</sup>        | 1.185                                                         |
| μ/mm <sup>-1</sup>                          | 0.071                                                         |
| F(000)                                      | 1000.0                                                        |
| Crystal size/mm <sup>3</sup>                | 0.15 × 0.15 × 0.12                                            |
| Radiation                                   | MoKα (λ = 0.71073)                                            |
| 2θ range for data collection/°              | 1.88 to 28.37                                                 |
| Index ranges                                | -17 ≤ h ≤ 17, -21 ≤ k ≤ 21, -19 ≤ l ≤ 19                      |
| Reflections collected                       | 59745                                                         |
| Independent reflections                     | 7800 [R <sub>int</sub> = 0.0743, R <sub>sigma</sub> = 0.0464] |
| Data/restraints/parameters                  | 7800/42/405                                                   |
| Goodness-of-fit on F <sup>2</sup>           | 0.9940                                                        |
| Final R indexes [I >= 2σ (I)]               | R <sub>1</sub> = 0.0490, wR <sub>2</sub> = 0.1092             |
| Final R indexes [all data]                  | R <sub>1</sub> = 0.1050, wR <sub>2</sub> = 0.1377             |
| Largest diff. peak/hole / e Å <sup>-3</sup> | 0.3412/-0.2527                                                |

**Table S2** Fractional Atomic Coordinates ( $\times 10^4$ ) and Equivalent Isotropic Displacement Parameters ( $\text{\AA}^2 \times 10^3$ ) for **4a**.  $U_{\text{eq}}$  is defined as 1/3 of the trace of the orthogonalised  $U_{\text{H}}$  tensor.

| Atom  | <i>x</i>   | <i>y</i>   | <i>z</i>   | <i>U</i> (eq) |
|-------|------------|------------|------------|---------------|
| O(1)  | 3250.0(11) | 4208.0(10) | 5677.9(10) | 47.2(4)       |
| N(1)  | 1471.9(14) | 4283.9(11) | 5490.5(12) | 42.8(4)       |
| N(2)  | 1582.9(14) | 5439.5(11) | 8648.9(13) | 44.9(5)       |
| N(3)  | -132.5(17) | 2556.6(15) | 7084.9(15) | 63.9(6)       |
| C(1)  | 1482(2)    | 4980.7(15) | 4856.1(17) | 53.7(6)       |
| C(2)  | 1523(2)    | 5777.2(15) | 5389.0(18) | 60.0(7)       |
| C(3)  | 2397(2)    | 5799.2(14) | 6114.7(17) | 50.6(6)       |
| C(4)  | 2331.3(16) | 5052.3(13) | 6730.8(14) | 39.0(5)       |
| C(5)  | 3188.3(16) | 4986.9(13) | 7489.1(14) | 37.1(5)       |
| C(6)  | 4159.5(16) | 4712.8(13) | 7063.5(15) | 38.8(5)       |
| C(7)  | 5125.3(17) | 4825.5(13) | 7534.9(16) | 41.4(5)       |
| C(8)  | 5237.2(18) | 5170.1(14) | 8426.5(17) | 48.6(6)       |
| C(9)  | 6162(2)    | 5273.2(17) | 8870.4(19) | 60.7(7)       |
| C(10) | 7046(2)    | 5028.9(19) | 8440(2)    | 66.3(8)       |
| C(11) | 6974(2)    | 4692.7(17) | 7586(2)    | 60.5(7)       |
| C(12) | 6025.4(17) | 4578.4(15) | 7108.9(17) | 46.9(5)       |
| C(13) | 5932.8(18) | 4228.2(16) | 6215.8(18) | 53.0(6)       |
| C(14) | 5018.2(18) | 4128.7(16) | 5767.2(17) | 51.1(6)       |
| C(15) | 4125.4(16) | 4359.5(13) | 6198.3(15) | 40.2(5)       |
| C(16) | 2309.3(15) | 4287.5(13) | 6157.7(14) | 39.0(5)       |
| C(17) | 2856.4(16) | 4425.1(13) | 8262.3(14) | 38.6(5)       |
| C(18) | 3288.0(18) | 3666.2(13) | 8415.6(16) | 45.4(5)       |
| C(19) | 2947(2)    | 3132.2(15) | 9075.0(17) | 53.9(6)       |
| C(20) | 2143(2)    | 3350.1(17) | 9586.7(18) | 59.4(7)       |
| C(21) | 1701(2)    | 4108.9(16) | 9448.0(17) | 54.4(6)       |
| C(22) | 2044.9(17) | 4655.0(14) | 8800.6(14) | 41.9(5)       |
| C(23) | 2016(2)    | 6085.7(17) | 9228(2)    | 67.2(8)       |
| C(24) | 1657(3)    | 6915.3(19) | 8870(3)    | 87.3(10)      |
| C(25) | 511(3)     | 6961(2)    | 8796(3)    | 87.9(10)      |
| C(26) | 78(2)      | 6246.5(19) | 8256(3)    | 82.6(10)      |
| C(27) | 479(2)     | 5444.3(18) | 8639(2)    | 67.9(8)       |
| C(28) | 1201.3(16) | 3500.5(14) | 5119.4(15) | 42.8(5)       |
| C(29) | 1319.3(19) | 3310.7(18) | 4199.9(18) | 59.0(7)       |
| C(30) | 1039(2)    | 2553(2)    | 3852(2)    | 70.1(8)       |
| C(31) | 667(2)     | 1975.8(19) | 4410(2)    | 69.3(8)       |
| C(32) | 542(2)     | 2152.4(17) | 5322(2)    | 66.2(8)       |
| C(33) | 791.2(19)  | 2908.0(16) | 5691.3(17) | 54.9(6)       |
| C(34) | 633(3)     | 3069(2)    | 6704(2)    | 79.5(10)      |
| C(35) | -118(4)    | 2522(3)    | 8071(3)    | 126.4(18)     |
| C(36) | -1084(3)   | 2116(3)    | 8286(3)    | 114.4(15)     |
| C(37) | -1809(3)   | 2309(3)    | 7437(3)    | 119.0(15)     |
| C(38) | -1152(3)   | 2718(3)    | 6744(3)    | 93.0(11)      |

**Table S3** Anisotropic Displacement Parameters ( $\text{\AA}^2 \times 10^3$ ) for **4a**. The Anisotropic displacement factor exponent takes the form:  $-2\pi^2[h^2a^*^2U_{11}+2hka^*b^*U_{12}+\dots]$ .

| Atom  | U <sub>11</sub> | U <sub>22</sub> | U <sub>33</sub> | U <sub>23</sub> | U <sub>13</sub> | U <sub>12</sub> |
|-------|-----------------|-----------------|-----------------|-----------------|-----------------|-----------------|
| O(1)  | 39.6(8)         | 57.6(10)        | 44.4(8)         | -9.3(7)         | 2.3(7)          | -3.6(7)         |
| N(1)  | 43.4(10)        | 43.7(10)        | 40.6(10)        | 6.1(8)          | -4.5(8)         | -6.3(8)         |
| N(2)  | 41.6(10)        | 43.9(11)        | 49.6(11)        | -4.2(9)         | 5.6(8)          | 1.4(8)          |
| N(3)  | 60.4(14)        | 70.7(15)        | 60.3(14)        | 13.5(11)        | 1.3(11)         | -25.3(11)       |
| C(1)  | 56.5(15)        | 53.4(14)        | 49.7(14)        | 13.8(11)        | -11.2(11)       | -8.4(12)        |
| C(2)  | 72.0(18)        | 46.1(14)        | 60.3(16)        | 16.3(12)        | -12.0(13)       | 1.9(12)         |
| C(3)  | 60.9(15)        | 37.1(12)        | 53.2(14)        | 5.4(10)         | -4.4(11)        | -1.3(11)        |
| C(4)  | 37.3(11)        | 38.5(11)        | 41.1(11)        | 2.3(9)          | 2.8(9)          | -0.3(9)         |
| C(5)  | 38.2(11)        | 33.1(10)        | 39.9(11)        | -1.2(9)         | 1.8(9)          | -1.7(8)         |
| C(6)  | 37.9(11)        | 33.7(11)        | 44.8(12)        | 2.3(9)          | 2.7(9)          | -2.4(9)         |
| C(7)  | 41.3(12)        | 35.0(11)        | 47.5(12)        | 3.8(9)          | -0.2(9)         | -1.7(9)         |
| C(8)  | 44.8(13)        | 46.1(13)        | 54.4(14)        | -3.3(11)        | -1.3(10)        | -0.1(10)        |
| C(9)  | 59.3(16)        | 60.6(17)        | 60.6(16)        | -7.1(13)        | -12.7(13)       | -3.3(13)        |
| C(10) | 45.5(15)        | 77(2)           | 74.6(19)        | 0.6(16)         | -13.9(13)       | -2.3(13)        |
| C(11) | 40.5(13)        | 68.4(18)        | 72.4(18)        | 0.6(14)         | 1.1(12)         | 1.4(12)         |
| C(12) | 38.5(12)        | 45.6(13)        | 56.6(14)        | 5.3(11)         | 3.1(10)         | 0.3(10)         |
| C(13) | 40.5(13)        | 59.7(15)        | 60.2(15)        | -2.0(12)        | 15.6(11)        | 2.3(11)         |
| C(14) | 48.8(14)        | 57.0(15)        | 48.2(13)        | -6.3(11)        | 9.2(11)         | -1.9(11)        |
| C(15) | 38.2(11)        | 39.0(11)        | 43.4(11)        | 0.0(9)          | 2.5(9)          | -2.6(9)         |
| C(16) | 36.4(11)        | 40.4(11)        | 40.2(11)        | 3.5(9)          | 1.0(9)          | -4.0(9)         |
| C(17) | 39.1(11)        | 37.5(11)        | 38.7(11)        | -0.6(9)         | -2.5(9)         | -4.5(9)         |
| C(18) | 48.6(13)        | 41.2(12)        | 46.0(12)        | 0.0(10)         | -1.8(10)        | 1.4(10)         |
| C(19) | 62.3(16)        | 42.1(13)        | 56.3(14)        | 8.2(11)         | -7.3(12)        | -0.9(11)        |
| C(20) | 63.8(16)        | 60.4(16)        | 53.5(15)        | 16.9(13)        | -1.8(12)        | -12.6(13)       |
| C(21) | 51.5(14)        | 62.5(16)        | 49.5(14)        | 5.4(12)         | 5.7(11)         | -5.8(12)        |
| C(22) | 42.6(12)        | 44.5(12)        | 38.4(11)        | -0.9(9)         | 0.9(9)          | -3.2(10)        |
| C(23) | 68.9(18)        | 55.7(16)        | 76.2(19)        | -18.7(14)       | -4.1(15)        | 1.1(14)         |
| C(24) | 88(2)           | 49.2(17)        | 124(3)          | -15.0(18)       | 3(2)            | 0.8(16)         |
| C(25) | 94(3)           | 61(2)           | 111(3)          | -4.4(19)        | 19(2)           | 25.1(17)        |
| C(26) | 57.8(18)        | 74(2)           | 116(3)          | 5.8(19)         | 2.2(17)         | 18.3(15)        |
| C(27) | 46.2(15)        | 64.8(18)        | 93(2)           | 1.6(16)         | 6.8(14)         | 5.8(13)         |
| C(28) | 36.2(11)        | 46.8(13)        | 44.8(12)        | -1.4(10)        | -2.8(9)         | -1.8(9)         |
| C(29) | 54.3(15)        | 71.1(18)        | 52.0(14)        | -7.2(13)        | 5.9(12)         | -5.4(13)        |
| C(30) | 63.1(17)        | 84(2)           | 63.5(17)        | -25.8(16)       | 5.1(14)         | -1.6(15)        |
| C(31) | 58.2(17)        | 58.6(17)        | 89(2)           | -26.5(16)       | -11.7(15)       | -0.3(13)        |
| C(32) | 68.6(18)        | 53.5(16)        | 75.7(19)        | -3.5(14)        | -3.5(15)        | -16.3(13)       |
| C(33) | 55.6(15)        | 54.7(15)        | 54.2(14)        | -1.6(12)        | 0.9(12)         | -13.8(12)       |
| C(34) | 93(2)           | 83(2)           | 63.7(18)        | -3.0(16)        | 14.7(16)        | -44.8(18)       |
| C(35) | 136(4)          | 169(5)          | 73(2)           | 16(3)           | -1(2)           | -76(3)          |
| C(36) | 118(3)          | 145(4)          | 83(3)           | 25(3)           | 32(2)           | -40(3)          |
| C(37) | 88(3)           | 148(4)          | 124(4)          | -4(3)           | 38(3)           | -25(3)          |
| C(38) | 71(2)           | 112(3)          | 97(3)           | 6(2)            | 11.4(19)        | -7(2)           |

**Table S4 Bond Lengths for 4a.**

| <b>Atom</b> | <b>Atom</b> | <b>Length/Å</b> | <b>Atom</b> | <b>Atom</b> | <b>Length/Å</b> |
|-------------|-------------|-----------------|-------------|-------------|-----------------|
| O(1)        | C(15)       | 1.369(3)        | C(11)       | C(12)       | 1.411(4)        |
| O(1)        | C(16)       | 1.461(2)        | C(12)       | C(13)       | 1.415(3)        |
| N(1)        | C(1)        | 1.465(3)        | C(13)       | C(14)       | 1.351(3)        |
| N(1)        | C(16)       | 1.430(3)        | C(14)       | C(15)       | 1.414(3)        |
| N(1)        | C(28)       | 1.428(3)        | C(17)       | C(18)       | 1.379(3)        |
| N(2)        | C(22)       | 1.433(3)        | C(17)       | C(22)       | 1.409(3)        |
| N(2)        | C(23)       | 1.449(3)        | C(18)       | C(19)       | 1.387(3)        |
| N(2)        | C(27)       | 1.456(3)        | C(19)       | C(20)       | 1.374(4)        |
| N(3)        | C(34)       | 1.445(3)        | C(20)       | C(21)       | 1.382(4)        |
| N(3)        | C(35)       | 1.430(4)        | C(21)       | C(22)       | 1.389(3)        |
| N(3)        | C(38)       | 1.434(4)        | C(23)       | C(24)       | 1.520(4)        |
| C(1)        | C(2)        | 1.514(4)        | C(24)       | C(25)       | 1.512(5)        |
| C(2)        | C(3)        | 1.520(3)        | C(25)       | C(26)       | 1.502(5)        |
| C(3)        | C(4)        | 1.519(3)        | C(26)       | C(27)       | 1.509(4)        |
| C(4)        | C(5)        | 1.539(3)        | C(28)       | C(29)       | 1.386(3)        |
| C(4)        | C(16)       | 1.501(3)        | C(28)       | C(33)       | 1.402(3)        |
| C(5)        | C(6)        | 1.520(3)        | C(29)       | C(30)       | 1.381(4)        |
| C(5)        | C(17)       | 1.531(3)        | C(30)       | C(31)       | 1.353(4)        |
| C(6)        | C(7)        | 1.427(3)        | C(31)       | C(32)       | 1.373(4)        |
| C(6)        | C(15)       | 1.380(3)        | C(32)       | C(33)       | 1.380(4)        |
| C(7)        | C(8)        | 1.411(3)        | C(33)       | C(34)       | 1.517(4)        |
| C(7)        | C(12)       | 1.426(3)        | C(35)       | C(36)       | 1.485(5)        |
| C(8)        | C(9)        | 1.360(3)        | C(36)       | C(37)       | 1.551(6)        |
| C(9)        | C(10)       | 1.410(4)        | C(37)       | C(38)       | 1.517(5)        |
| C(10)       | C(11)       | 1.353(4)        |             |             |                 |

**Table S5** Bond Angles for **4a**.

| Atom  | Atom  | Atom  | Angle/°    |  | Atom  | Atom  | Atom  | Angle/°    |
|-------|-------|-------|------------|--|-------|-------|-------|------------|
| C(15) | O(1)  | C(16) | 115.83(16) |  | O(1)  | C(15) | C(14) | 114.03(19) |
| C(16) | N(1)  | C(1)  | 112.90(17) |  | C(6)  | C(15) | C(14) | 121.7(2)   |
| C(28) | N(1)  | C(1)  | 118.16(18) |  | O(1)  | C(16) | C(4)  | 110.21(16) |
| C(28) | N(1)  | C(16) | 115.32(18) |  | N(1)  | C(16) | O(1)  | 108.91(16) |
| C(22) | N(2)  | C(23) | 114.4(2)   |  | N(1)  | C(16) | C(4)  | 111.69(18) |
| C(22) | N(2)  | C(27) | 115.09(19) |  | C(18) | C(17) | C(5)  | 121.77(19) |
| C(23) | N(2)  | C(27) | 111.5(2)   |  | C(18) | C(17) | C(22) | 118.1(2)   |
| C(35) | N(3)  | C(34) | 115.6(3)   |  | C(22) | C(17) | C(5)  | 120.02(19) |
| C(35) | N(3)  | C(38) | 108.4(3)   |  | C(17) | C(18) | C(19) | 122.1(2)   |
| C(38) | N(3)  | C(34) | 115.1(3)   |  | C(20) | C(19) | C(18) | 119.8(2)   |
| N(1)  | C(1)  | C(2)  | 110.5(2)   |  | C(19) | C(20) | C(21) | 119.2(2)   |
| C(1)  | C(2)  | C(3)  | 112.3(2)   |  | C(20) | C(21) | C(22) | 121.7(2)   |
| C(4)  | C(3)  | C(2)  | 108.86(19) |  | C(17) | C(22) | N(2)  | 118.94(19) |
| C(3)  | C(4)  | C(5)  | 114.41(18) |  | C(21) | C(22) | N(2)  | 121.9(2)   |
| C(16) | C(4)  | C(3)  | 110.17(18) |  | C(21) | C(22) | C(17) | 119.2(2)   |
| C(16) | C(4)  | C(5)  | 109.24(17) |  | N(2)  | C(23) | C(24) | 110.3(2)   |
| C(6)  | C(5)  | C(4)  | 109.55(17) |  | C(25) | C(24) | C(23) | 111.2(3)   |
| C(6)  | C(5)  | C(17) | 113.59(17) |  | C(26) | C(25) | C(24) | 110.5(3)   |
| C(17) | C(5)  | C(4)  | 109.67(16) |  | C(25) | C(26) | C(27) | 111.6(3)   |
| C(7)  | C(6)  | C(5)  | 121.29(19) |  | N(2)  | C(27) | C(26) | 109.9(2)   |
| C(15) | C(6)  | C(5)  | 120.32(19) |  | C(29) | C(28) | N(1)  | 121.7(2)   |
| C(15) | C(6)  | C(7)  | 118.38(19) |  | C(29) | C(28) | C(33) | 118.7(2)   |
| C(8)  | C(7)  | C(6)  | 122.6(2)   |  | C(33) | C(28) | N(1)  | 119.6(2)   |
| C(8)  | C(7)  | C(12) | 117.4(2)   |  | C(30) | C(29) | C(28) | 120.7(3)   |
| C(12) | C(7)  | C(6)  | 120.0(2)   |  | C(31) | C(30) | C(29) | 120.4(3)   |
| C(9)  | C(8)  | C(7)  | 122.1(2)   |  | C(30) | C(31) | C(32) | 119.7(3)   |
| C(8)  | C(9)  | C(10) | 119.9(3)   |  | C(31) | C(32) | C(33) | 121.6(3)   |
| C(11) | C(10) | C(9)  | 120.0(3)   |  | C(28) | C(33) | C(34) | 122.0(2)   |
| C(10) | C(11) | C(12) | 121.3(2)   |  | C(32) | C(33) | C(28) | 118.8(2)   |
| C(11) | C(12) | C(7)  | 119.2(2)   |  | C(32) | C(33) | C(34) | 119.2(2)   |
| C(11) | C(12) | C(13) | 122.3(2)   |  | N(3)  | C(34) | C(33) | 113.8(2)   |
| C(13) | C(12) | C(7)  | 118.5(2)   |  | N(3)  | C(35) | C(36) | 105.1(3)   |
| C(14) | C(13) | C(12) | 121.4(2)   |  | C(35) | C(36) | C(37) | 104.1(3)   |
| C(13) | C(14) | C(15) | 120.0(2)   |  | C(38) | C(37) | C(36) | 105.3(3)   |
| O(1)  | C(15) | C(6)  | 124.27(19) |  | N(3)  | C(38) | C(37) | 104.4(3)   |

**Table S6** Torsion Angles for **4a**.

| <b>A</b> | <b>B</b> | <b>C</b> | <b>D</b> | <b>Angle/°</b> | <b>A</b> | <b>B</b> | <b>C</b> | <b>D</b> | <b>Angle/°</b> |
|----------|----------|----------|----------|----------------|----------|----------|----------|----------|----------------|
| N(1)     | C(1)     | C(2)     | C(3)     | 53.3(3)        | C(15)    | C(6)     | C(7)     | C(8)     | -179.1(2)      |
| N(1)     | C(28)    | C(29)    | C(30)    | -179.0(2)      | C(15)    | C(6)     | C(7)     | C(12)    | 0.3(3)         |
| N(1)     | C(28)    | C(33)    | C(32)    | -179.5(2)      | C(16)    | O(1)     | C(15)    | C(6)     | -12.0(3)       |
| N(1)     | C(28)    | C(33)    | C(34)    | -0.6(4)        | C(16)    | O(1)     | C(15)    | C(14)    | 168.65(19)     |
| N(2)     | C(23)    | C(24)    | C(25)    | 55.6(4)        | C(16)    | N(1)     | C(1)     | C(2)     | -55.3(3)       |
| N(3)     | C(35)    | C(36)    | C(37)    | -26.2(5)       | C(16)    | N(1)     | C(28)    | C(29)    | -113.4(2)      |
| C(1)     | N(1)     | C(16)    | O(1)     | -63.3(2)       | C(16)    | N(1)     | C(28)    | C(33)    | 67.6(3)        |
| C(1)     | N(1)     | C(16)    | C(4)     | 58.7(2)        | C(16)    | C(4)     | C(5)     | C(6)     | 48.6(2)        |
| C(1)     | N(1)     | C(28)    | C(29)    | 24.5(3)        | C(16)    | C(4)     | C(5)     | C(17)    | -76.7(2)       |
| C(1)     | N(1)     | C(28)    | C(33)    | -154.5(2)      | C(17)    | C(5)     | C(6)     | C(7)     | -75.4(2)       |
| C(1)     | C(2)     | C(3)     | C(4)     | -53.9(3)       | C(17)    | C(5)     | C(6)     | C(15)    | 105.8(2)       |
| C(2)     | C(3)     | C(4)     | C(5)     | 178.8(2)       | C(17)    | C(18)    | C(19)    | C(20)    | 1.2(4)         |
| C(2)     | C(3)     | C(4)     | C(16)    | 55.3(3)        | C(18)    | C(17)    | C(22)    | N(2)     | -179.7(2)      |
| C(3)     | C(4)     | C(5)     | C(6)     | -75.5(2)       | C(18)    | C(17)    | C(22)    | C(21)    | -1.1(3)        |
| C(3)     | C(4)     | C(5)     | C(17)    | 159.23(19)     | C(18)    | C(19)    | C(20)    | C(21)    | -1.4(4)        |
| C(3)     | C(4)     | C(16)    | O(1)     | 62.7(2)        | C(19)    | C(20)    | C(21)    | C(22)    | 0.4(4)         |
| C(3)     | C(4)     | C(16)    | N(1)     | -58.5(2)       | C(20)    | C(21)    | C(22)    | N(2)     | 179.5(2)       |
| C(4)     | C(5)     | C(6)     | C(7)     | 161.62(18)     | C(20)    | C(21)    | C(22)    | C(17)    | 0.9(4)         |
| C(4)     | C(5)     | C(6)     | C(15)    | -17.2(3)       | C(22)    | N(2)     | C(23)    | C(24)    | 166.8(2)       |
| C(4)     | C(5)     | C(17)    | C(18)    | 110.7(2)       | C(22)    | N(2)     | C(27)    | C(26)    | -166.7(2)      |
| C(4)     | C(5)     | C(17)    | C(22)    | -65.1(2)       | C(22)    | C(17)    | C(18)    | C(19)    | 0.1(3)         |
| C(5)     | C(4)     | C(16)    | O(1)     | -63.8(2)       | C(23)    | N(2)     | C(22)    | C(17)    | -92.0(3)       |
| C(5)     | C(4)     | C(16)    | N(1)     | 175.02(16)     | C(23)    | N(2)     | C(22)    | C(21)    | 89.5(3)        |
| C(5)     | C(6)     | C(7)     | C(8)     | 2.1(3)         | C(23)    | N(2)     | C(27)    | C(26)    | 60.9(3)        |
| C(5)     | C(6)     | C(7)     | C(12)    | -178.60(19)    | C(23)    | C(24)    | C(25)    | C(26)    | -51.8(4)       |
| C(5)     | C(6)     | C(15)    | O(1)     | -1.9(3)        | C(24)    | C(25)    | C(26)    | C(27)    | 52.6(4)        |
| C(5)     | C(6)     | C(15)    | C(14)    | 177.4(2)       | C(25)    | C(26)    | C(27)    | N(2)     | -56.7(4)       |
| C(5)     | C(17)    | C(18)    | C(19)    | -175.8(2)      | C(27)    | N(2)     | C(22)    | C(17)    | 137.0(2)       |
| C(5)     | C(17)    | C(22)    | N(2)     | -3.8(3)        | C(27)    | N(2)     | C(22)    | C(21)    | -41.5(3)       |
| C(5)     | C(17)    | C(22)    | C(21)    | 174.8(2)       | C(27)    | N(2)     | C(23)    | C(24)    | -60.5(3)       |
| C(6)     | C(5)     | C(17)    | C(18)    | -12.3(3)       | C(28)    | N(1)     | C(1)     | C(2)     | 165.8(2)       |
| C(6)     | C(5)     | C(17)    | C(22)    | 171.93(19)     | C(28)    | N(1)     | C(16)    | O(1)     | 76.8(2)        |
| C(6)     | C(7)     | C(8)     | C(9)     | 179.9(2)       | C(28)    | N(1)     | C(16)    | C(4)     | -161.28(18)    |
| C(6)     | C(7)     | C(12)    | C(11)    | -179.8(2)      | C(28)    | C(29)    | C(30)    | C(31)    | -1.6(4)        |
| C(6)     | C(7)     | C(12)    | C(13)    | 0.4(3)         | C(28)    | C(33)    | C(34)    | N(3)     | 156.6(3)       |
| C(7)     | C(6)     | C(15)    | O(1)     | 179.17(19)     | C(29)    | C(28)    | C(33)    | C(32)    | 1.4(4)         |
| C(7)     | C(6)     | C(15)    | C(14)    | -1.5(3)        | C(29)    | C(28)    | C(33)    | C(34)    | -179.7(3)      |
| C(7)     | C(8)     | C(9)     | C(10)    | -0.3(4)        | C(29)    | C(30)    | C(31)    | C(32)    | 1.8(5)         |
| C(7)     | C(12)    | C(13)    | C(14)    | 0.2(4)         | C(30)    | C(31)    | C(32)    | C(33)    | -0.3(5)        |
| C(8)     | C(7)     | C(12)    | C(11)    | -0.5(3)        | C(31)    | C(32)    | C(33)    | C(28)    | -1.3(4)        |
| C(8)     | C(7)     | C(12)    | C(13)    | 179.8(2)       | C(31)    | C(32)    | C(33)    | C(34)    | 179.8(3)       |
| C(8)     | C(9)     | C(10)    | C(11)    | 0.0(4)         | C(32)    | C(33)    | C(34)    | N(3)     | -24.5(4)       |
| C(9)     | C(10)    | C(11)    | C(12)    | 0.0(4)         | C(33)    | C(28)    | C(29)    | C(30)    | 0.0(4)         |
| C(10)    | C(11)    | C(12)    | C(7)     | 0.2(4)         | C(34)    | N(3)     | C(35)    | C(36)    | 168.3(4)       |
| C(10)    | C(11)    | C(12)    | C(13)    | 180.0(3)       | C(34)    | N(3)     | C(38)    | C(37)    | -163.1(3)      |
| C(11)    | C(12)    | C(13)    | C(14)    | -179.6(2)      | C(35)    | N(3)     | C(34)    | C(33)    | 163.5(4)       |
| C(12)    | C(7)     | C(8)     | C(9)     | 0.5(3)         | C(35)    | N(3)     | C(38)    | C(37)    | -31.9(4)       |
| C(12)    | C(13)    | C(14)    | C(15)    | -1.4(4)        | C(35)    | C(36)    | C(37)    | C(38)    | 7.3(5)         |
| C(13)    | C(14)    | C(15)    | O(1)     | -178.5(2)      | C(36)    | C(37)    | C(38)    | N(3)     | 14.1(5)        |
| C(13)    | C(14)    | C(15)    | C(6)     | 2.2(4)         | C(38)    | N(3)     | C(34)    | C(33)    | -68.9(4)       |
| C(15)    | O(1)     | C(16)    | N(1)     | 167.81(17)     | C(38)    | N(3)     | C(35)    | C(36)    | 37.3(5)        |
| C(15)    | O(1)     | C(16)    | C(4)     | 45.0(2)        |          |          |          |          |                |



**Table S7** Hydrogen Atom Coordinates ( $\text{\AA}\times 10^4$ ) and Isotropic Displacement Parameters ( $\text{\AA}^2\times 10^3$ ) for **4a**.

| Atom   | <i>x</i> | <i>y</i> | <i>z</i> | U(eq) |
|--------|----------|----------|----------|-------|
| H(3)   | 17       | 2000     | 6883     | 77    |
| H(1A)  | 876      | 4970     | 4447     | 64    |
| H(1B)  | 2067     | 4942     | 4481     | 64    |
| H(2A)  | 890      | 5852     | 5688     | 72    |
| H(2B)  | 1596     | 6227     | 4961     | 72    |
| H(3A)  | 3038     | 5800     | 5817     | 61    |
| H(3B)  | 2359     | 6293     | 6482     | 61    |
| H(4)   | 1688     | 5084     | 7037     | 47    |
| H(5)   | 3305     | 5533     | 7751     | 44    |
| H(8)   | 4661     | 5332     | 8720     | 58    |
| H(9)   | 6211     | 5505     | 9457     | 73    |
| H(10)  | 7678     | 5099     | 8743     | 80    |
| H(11)  | 7562     | 4534     | 7309     | 73    |
| H(13)  | 6514     | 4063     | 5932     | 64    |
| H(14)  | 4976     | 3908     | 5175     | 61    |
| H(16)  | 2246     | 3816     | 6568     | 47    |
| H(18)  | 3825     | 3507     | 8066     | 54    |
| H(19)  | 3262     | 2628     | 9170     | 65    |
| H(20)  | 1900     | 2991     | 10021    | 71    |
| H(21)  | 1159     | 4258     | 9797     | 65    |
| H(23A) | 2750     | 6059     | 9232     | 81    |
| H(23B) | 1815     | 6012     | 9857     | 81    |
| H(24A) | 1919     | 7339     | 9285     | 105   |
| H(24B) | 1920     | 7012     | 8268     | 105   |
| H(25A) | 252      | 6961     | 9409     | 106   |
| H(25B) | 302      | 7466     | 8492     | 106   |
| H(26A) | 250      | 6297     | 7616     | 99    |
| H(26B) | -655     | 6253     | 8275     | 99    |
| H(27A) | 260      | 5368     | 9261     | 82    |
| H(27B) | 211      | 4997     | 8260     | 82    |
| H(29)  | 1590     | 3698     | 3813     | 71    |
| H(30)  | 1106     | 2440     | 3229     | 84    |
| H(31)  | 496      | 1462     | 4176     | 83    |
| H(32)  | 283      | 1753     | 5701     | 79    |
| H(34A) | 1271     | 2984     | 7054     | 95    |
| H(34B) | 442      | 3637     | 6777     | 95    |
| H(35A) | -82      | 3067     | 8334     | 152   |
| H(35B) | 459      | 2208     | 8315     | 152   |
| H(36A) | -1346    | 2337     | 8847     | 137   |
| H(36B) | -989     | 1531     | 8359     | 137   |
| H(37A) | -2107    | 1810     | 7182     | 143   |
| H(37B) | -2349    | 2671     | 7608     | 143   |
| H(38A) | -1278    | 2487     | 6133     | 112   |
| H(38B) | -1282    | 3301     | 6716     | 112   |

The crystal of **4n** was obtained from ethyl acetate/petroleum ether at room temperature. The structure of compound **4n** was assigned by single crystal X-ray analysis. Diffraction data were collected on a Bruker Smart Apex II CCD diffractometer with graphite-monochromated Mo K $\alpha$  ( $\lambda = 0.71073 \text{ \AA}$ ). The crystal data of compound **4n** have been deposited in CCDC with number 2375645.

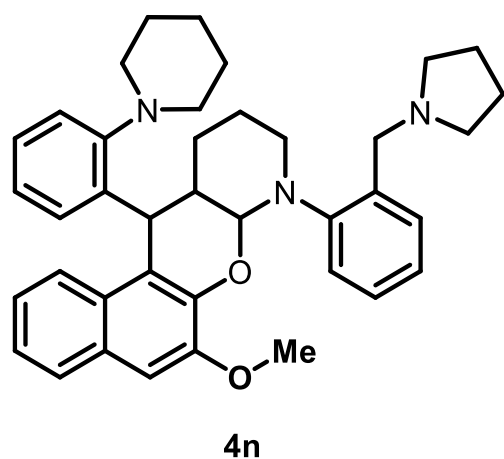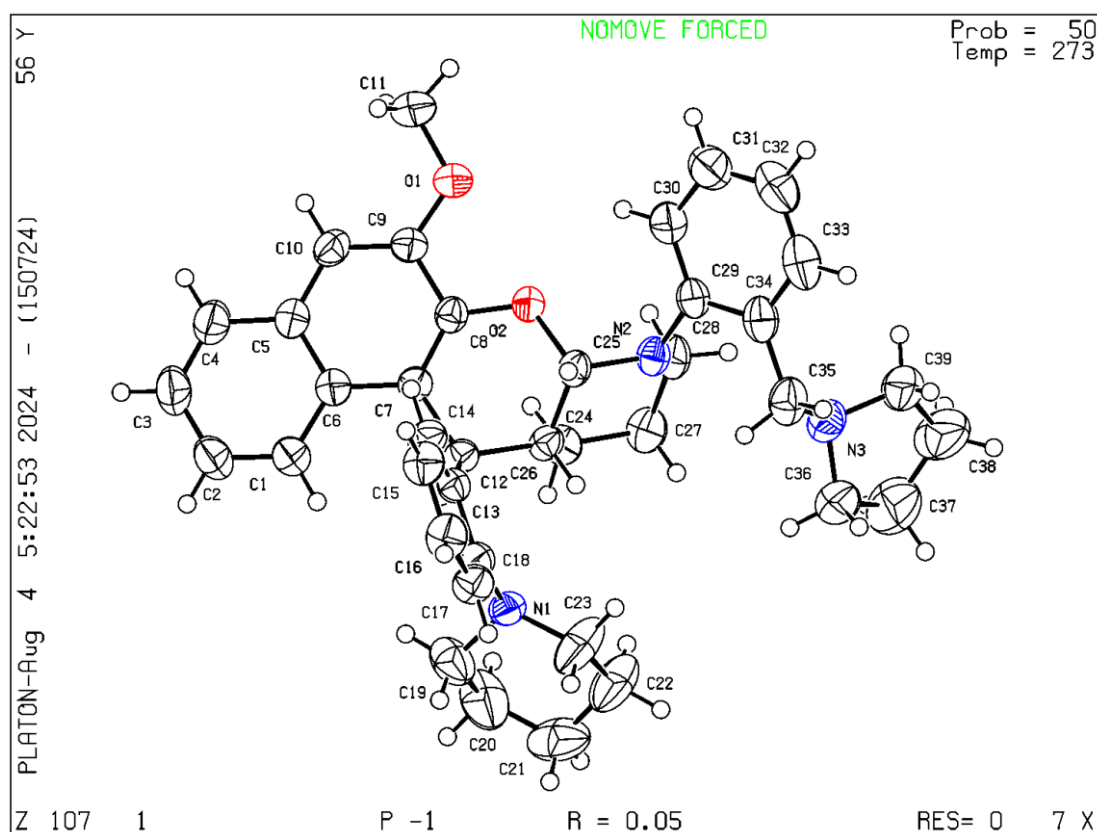

**Figure S1** X-ray structure of compound **4n** (CCDC 2375645) (Thermal ellipsoids are drawn at the 50% probability level).

**Table S1 Crystal data and structure refinement for 4n.**

|                                             |                                                               |
|---------------------------------------------|---------------------------------------------------------------|
| Identification code                         | <b>4n</b>                                                     |
| Empirical formula                           | C <sub>39</sub> H <sub>45</sub> N <sub>3</sub> O <sub>2</sub> |
| Formula weight                              | 587.78                                                        |
| Temperature/K                               | 273.15                                                        |
| Crystal system                              | triclinic                                                     |
| Space group                                 | P-1                                                           |
| a/Å                                         | 9.5701(5)                                                     |
| b/Å                                         | 12.7196(8)                                                    |
| c/Å                                         | 14.9523(9)                                                    |
| α/°                                         | 105.788(2)                                                    |
| β/°                                         | 92.153(2)                                                     |
| γ/°                                         | 109.699(2)                                                    |
| Volume/Å <sup>3</sup>                       | 1632.07(17)                                                   |
| Z                                           | 2                                                             |
| ρ <sub>calc</sub> /cm <sup>3</sup>          | 1.196                                                         |
| μ/mm <sup>-1</sup>                          | 0.074                                                         |
| F(000)                                      | 632.0                                                         |
| Crystal size/mm <sup>3</sup>                | 0.23 × 0.22 × 0.18                                            |
| Radiation                                   | MoKα (λ = 0.71073)                                            |
| 2θ range for data collection/°              | 4.568 to 56.604                                               |
| Index ranges                                | -12 ≤ h ≤ 11, -16 ≤ k ≤ 16, -19 ≤ l ≤ 19                      |
| Reflections collected                       | 35820                                                         |
| Independent reflections                     | 8087 [R <sub>int</sub> = 0.0711, R <sub>sigma</sub> = 0.0512] |
| Data/restraints/parameters                  | 8087/0/398                                                    |
| Goodness-of-fit on F <sup>2</sup>           | 1.033                                                         |
| Final R indexes [I ≥ 2σ (I)]                | R <sub>1</sub> = 0.0547, wR <sub>2</sub> = 0.1314             |
| Final R indexes [all data]                  | R <sub>1</sub> = 0.0943, wR <sub>2</sub> = 0.1655             |
| Largest diff. peak/hole / e Å <sup>-3</sup> | 0.27/-0.25                                                    |

**Table S2** Fractional Atomic Coordinates ( $\times 10^4$ ) and Equivalent Isotropic Displacement Parameters ( $\text{\AA}^2 \times 10^3$ ) for **4n**.  $U_{\text{eq}}$  is defined as 1/3 of the trace of the orthogonalised  $U_{\text{H}}$  tensor.

| Atom | <i>x</i>    | <i>y</i>    | <i>z</i>   | <i>U</i> (eq) |
|------|-------------|-------------|------------|---------------|
| O2   | 5523.9(13)  | 6508.5(10)  | 3411.8(8)  | 44.4(3)       |
| O1   | 3679.7(15)  | 5079.8(11)  | 4100.4(9)  | 54.0(4)       |
| N2   | 6757.1(15)  | 8521.3(12)  | 3565.3(10) | 40.4(3)       |
| N1   | 9421.9(16)  | 6936.2(12)  | 890.0(10)  | 42.1(3)       |
| N3   | 8244.4(18)  | 11280.4(14) | 3783.6(12) | 54.3(4)       |
| C8   | 5231.7(17)  | 5363.7(14)  | 2940.4(12) | 37.6(4)       |
| C13  | 8629.6(18)  | 5929.6(14)  | 2066.1(11) | 36.8(4)       |
| C6   | 5432.5(19)  | 3739.2(15)  | 1730.6(12) | 40.2(4)       |
| C7   | 5870.7(17)  | 4976.9(14)  | 2176.9(11) | 37.5(4)       |
| C18  | 9782.4(18)  | 6477.3(14)  | 1610.5(12) | 38.7(4)       |
| C12  | 7027.5(17)  | 5852.2(14)  | 1816.5(12) | 36.9(4)       |
| C9   | 4159.0(19)  | 4560.0(15)  | 3314.1(12) | 41.9(4)       |
| C25  | 6838.6(18)  | 7390.7(14)  | 3218.6(12) | 38.0(4)       |
| C24  | 6906.3(18)  | 7068.7(14)  | 2171.5(12) | 38.6(4)       |
| C5   | 4326(2)     | 2949.2(15)  | 2083.1(13) | 44.2(4)       |
| C14  | 8999(2)     | 5520.2(16)  | 2777.3(13) | 45.5(4)       |
| C29  | 7024.3(19)  | 9062.0(15)  | 4560.2(13) | 42.7(4)       |
| C10  | 3717(2)     | 3388.1(15)  | 2883.6(13) | 46.2(4)       |
| C28  | 5513(2)     | 8691.7(16)  | 3092.2(14) | 47.7(4)       |
| C1   | 6050(2)     | 3265.3(17)  | 947.9(13)  | 51.0(5)       |
| C17  | 11244.4(19) | 6581.2(16)  | 1879.8(14) | 49.3(4)       |
| C26  | 5588(2)     | 7171.1(16)  | 1641.8(13) | 46.7(4)       |
| C34  | 8124(2)     | 10184.0(16) | 4916.3(14) | 48.6(4)       |
| C27  | 5534(2)     | 8390.7(17)  | 2048.3(14) | 53.0(5)       |
| C16  | 11585(2)    | 6171.2(17)  | 2587.1(15) | 53.3(5)       |
| C15  | 10463(2)    | 5641.8(17)  | 3040.0(14) | 51.2(5)       |
| C4   | 3856(2)     | 1731.1(17)  | 1617.7(15) | 57.7(5)       |
| C30  | 6197(2)     | 8529.3(17)  | 5161.6(14) | 56.7(5)       |
| C35  | 9041(2)     | 10769.7(17) | 4273.1(16) | 57.6(5)       |
| C2   | 5576(3)     | 2080.7(18)  | 519.7(15)  | 63.0(6)       |
| C3   | 4459(3)     | 1310.9(18)  | 850.6(16)  | 67.8(6)       |
| C33  | 8329(3)     | 10739.9(19) | 5876.4(16) | 63.7(6)       |
| C11  | 2813(3)     | 4331(2)     | 4590.6(16) | 70.6(7)       |
| C31  | 6425(3)     | 9100(2)     | 6111.4(16) | 70.6(6)       |
| C32  | 7484(3)     | 10208(2)    | 6466.7(16) | 70.5(6)       |
| C19  | 9211(3)     | 6171(2)     | -55.3(15)  | 73.5(7)       |
| C39  | 8100(3)     | 12340(2)    | 4367.2(18) | 73.2(7)       |
| C36  | 8916(3)     | 11605(2)    | 2995.9(18) | 74.1(7)       |
| C22  | 9773(4)     | 8620(2)     | 323(2)     | 90.4(9)       |
| C20  | 8569(4)     | 6622(2)     | -749.0(17) | 95.4(10)      |
| C21  | 9553(3)     | 7856(3)     | -675(2)    | 90.4(9)       |
| C23  | 10393(3)    | 8129(2)     | 991(2)     | 85.6(8)       |
| C38  | 7728(4)     | 12937(3)    | 3699(2)    | 103.6(10)     |
| C37  | 8099(5)     | 12350(3)    | 2765(2)    | 110.1(11)     |

**Table S3** Anisotropic Displacement Parameters ( $\text{\AA}^2 \times 10^3$ ) for **4n**. The Anisotropic displacement factor exponent takes the form:  $-2\pi^2[h^2a^2U_{11}+2hka*b*U_{12}+\dots]$ .

| Atom | U <sub>11</sub> | U <sub>22</sub> | U <sub>33</sub> | U <sub>23</sub> | U <sub>13</sub> | U <sub>12</sub> |
|------|-----------------|-----------------|-----------------|-----------------|-----------------|-----------------|
| O2   | 49.2(7)         | 33.4(6)         | 51.1(7)         | 12.3(5)         | 17.5(6)         | 14.8(5)         |
| O1   | 58.0(8)         | 48.4(7)         | 56.6(8)         | 17.7(6)         | 26.5(6)         | 16.9(6)         |
| N2   | 40.3(7)         | 35.6(7)         | 48.1(8)         | 13.6(6)         | 3.5(6)          | 16.8(6)         |
| N1   | 45.1(8)         | 43.2(8)         | 42.3(8)         | 18.5(6)         | 11.0(6)         | 16.3(6)         |
| N3   | 48.7(9)         | 45.4(9)         | 67.8(11)        | 20.1(8)         | 10.3(8)         | 13.3(7)         |
| C8   | 35.4(8)         | 34.4(8)         | 43.7(9)         | 12.0(7)         | 4.5(7)          | 13.3(7)         |
| C13  | 38.1(8)         | 35.5(8)         | 38.6(9)         | 10.4(7)         | 6.5(7)          | 15.8(7)         |
| C6   | 40.6(9)         | 40.2(9)         | 40.0(9)         | 11.8(7)         | 2.7(7)          | 15.5(7)         |
| C7   | 34.8(8)         | 37.8(8)         | 40.4(9)         | 12.6(7)         | 5.2(7)          | 13.2(7)         |
| C18  | 38.3(8)         | 38.9(9)         | 41.6(9)         | 12.6(7)         | 7.0(7)          | 16.7(7)         |
| C12  | 34.9(8)         | 38.5(8)         | 39.6(9)         | 14.0(7)         | 6.4(7)          | 14.0(7)         |
| C9   | 40.4(9)         | 43.2(9)         | 43.4(9)         | 14.1(8)         | 10.6(7)         | 15.5(7)         |
| C25  | 34.5(8)         | 34.9(8)         | 47.4(10)        | 14.6(7)         | 5.8(7)          | 14.5(7)         |
| C24  | 35.2(8)         | 38.4(9)         | 48.4(10)        | 19.2(7)         | 9.0(7)          | 15.8(7)         |
| C5   | 46.4(9)         | 37.3(9)         | 46.8(10)        | 12.4(8)         | 2.7(8)          | 13.2(7)         |
| C14  | 46.2(9)         | 49.1(10)        | 50.1(10)        | 23.7(8)         | 10.1(8)         | 20.7(8)         |
| C29  | 45.7(9)         | 38.0(9)         | 48.8(10)        | 11.5(8)         | 5.5(8)          | 21.9(7)         |
| C10  | 42.0(9)         | 39.3(9)         | 55.0(11)        | 17.8(8)         | 11.0(8)         | 8.5(7)          |
| C28  | 44.0(9)         | 40.4(9)         | 63.1(12)        | 15.5(8)         | 3.3(8)          | 21.3(8)         |
| C1   | 58.3(11)        | 47.6(10)        | 47.0(10)        | 12.1(8)         | 10.3(9)         | 20.6(9)         |
| C17  | 37.1(9)         | 53.0(11)        | 60.8(12)        | 20.1(9)         | 10.4(8)         | 17.2(8)         |
| C26  | 47.2(10)        | 53.9(11)        | 46.3(10)        | 17.7(8)         | 3.6(8)          | 25.6(8)         |
| C34  | 46.1(10)        | 42.0(10)        | 59.1(12)        | 10.5(9)         | -2.7(8)         | 22.4(8)         |
| C27  | 54.3(11)        | 54.6(11)        | 61.4(12)        | 24.9(10)        | 1.0(9)          | 28.7(9)         |
| C16  | 39.7(9)         | 53.9(11)        | 69.4(13)        | 19.3(10)        | 0.6(9)          | 21.2(8)         |
| C15  | 53.0(11)        | 54.8(11)        | 53.2(11)        | 21.1(9)         | -0.5(9)         | 25.6(9)         |
| C4   | 65.1(12)        | 40.8(10)        | 60.4(12)        | 13.8(9)         | 6.7(10)         | 12.1(9)         |
| C30  | 71.2(13)        | 46.3(11)        | 55.0(12)        | 14.4(9)         | 13.9(10)        | 24.3(10)        |
| C35  | 40.3(10)        | 45.5(10)        | 81.2(15)        | 13.7(10)        | 3.9(9)          | 12.9(8)         |
| C2   | 83.9(15)        | 53.8(12)        | 50.0(11)        | 6.4(10)         | 14.2(11)        | 30.3(11)        |
| C3   | 90.4(17)        | 39.8(11)        | 63.0(14)        | 4.1(10)         | 7.1(12)         | 20.1(11)        |
| C33  | 64.6(13)        | 50.9(12)        | 67.3(14)        | 0.5(10)         | -12.3(11)       | 26.3(10)        |
| C11  | 76.0(15)        | 63.3(13)        | 69.6(14)        | 24.3(11)        | 37.9(12)        | 15.2(11)        |
| C31  | 101.8(19)       | 67.3(15)        | 57.3(13)        | 22.6(11)        | 21.2(13)        | 44.5(14)        |
| C32  | 95.0(18)        | 72.8(15)        | 50.4(12)        | 6.0(11)         | -1.5(12)        | 50.0(14)        |
| C19  | 118(2)          | 75.9(15)        | 46.1(12)        | 17.7(11)        | 11.8(12)        | 59.5(15)        |
| C39  | 90.9(17)        | 61.1(14)        | 87.7(17)        | 36.0(13)        | 34.0(14)        | 39.6(13)        |
| C36  | 76.1(15)        | 60.8(14)        | 74.2(15)        | 20.0(12)        | 21.4(13)        | 10.2(12)        |
| C22  | 108(2)          | 67.3(16)        | 92(2)           | 49.0(15)        | -9.6(16)        | 9.4(14)         |
| C20  | 161(3)          | 87.0(19)        | 47.4(13)        | 13.6(13)        | -10.9(16)       | 65(2)           |
| C21  | 102(2)          | 130(3)          | 83.3(19)        | 72.7(19)        | 34.0(16)        | 62.8(19)        |
| C23  | 87.6(18)        | 64.4(15)        | 92.5(19)        | 48.5(14)        | -16.3(14)       | -4.2(13)        |
| C38  | 125(3)          | 105(2)          | 133(3)          | 78(2)           | 57(2)           | 69(2)           |
| C37  | 156(3)          | 97(2)           | 99(2)           | 54.9(19)        | 22(2)           | 52(2)           |

**Table S4 Bond Lengths for 4n.**

| Atom | Atom | Length/Å   |  | Atom | Atom | Length/Å |
|------|------|------------|--|------|------|----------|
| O2   | C8   | 1.3591(19) |  | C24  | C26  | 1.526(2) |
| O2   | C25  | 1.4757(19) |  | C5   | C10  | 1.412(3) |
| O1   | C9   | 1.361(2)   |  | C5   | C4   | 1.417(3) |
| O1   | C11  | 1.423(2)   |  | C14  | C15  | 1.386(3) |
| N2   | C25  | 1.420(2)   |  | C29  | C34  | 1.400(2) |
| N2   | C29  | 1.431(2)   |  | C29  | C30  | 1.385(3) |
| N2   | C28  | 1.469(2)   |  | C28  | C27  | 1.505(3) |
| N1   | C18  | 1.439(2)   |  | C1   | C2   | 1.371(3) |
| N1   | C19  | 1.443(3)   |  | C17  | C16  | 1.373(3) |
| N1   | C23  | 1.450(3)   |  | C26  | C27  | 1.524(3) |
| N3   | C35  | 1.446(3)   |  | C34  | C35  | 1.504(3) |
| N3   | C39  | 1.446(3)   |  | C34  | C33  | 1.390(3) |
| N3   | C36  | 1.453(3)   |  | C16  | C15  | 1.371(3) |
| C8   | C7   | 1.367(2)   |  | C4   | C3   | 1.363(3) |
| C8   | C9   | 1.434(2)   |  | C30  | C31  | 1.379(3) |
| C13  | C18  | 1.401(2)   |  | C2   | C3   | 1.394(3) |
| C13  | C12  | 1.528(2)   |  | C33  | C32  | 1.378(3) |
| C13  | C14  | 1.387(2)   |  | C31  | C32  | 1.373(3) |
| C6   | C7   | 1.436(2)   |  | C19  | C20  | 1.515(3) |
| C6   | C5   | 1.422(2)   |  | C39  | C38  | 1.506(3) |
| C6   | C1   | 1.411(2)   |  | C36  | C37  | 1.512(4) |
| C7   | C12  | 1.515(2)   |  | C22  | C21  | 1.505(4) |
| C18  | C17  | 1.393(2)   |  | C22  | C23  | 1.512(3) |
| C12  | C24  | 1.539(2)   |  | C20  | C21  | 1.505(4) |
| C9   | C10  | 1.359(2)   |  | C38  | C37  | 1.510(4) |
| C25  | C24  | 1.516(2)   |  |      |      |          |

**Table S5** Bond Angles for **4n**.

| Atom | Atom | Atom | Angle/°    |  | Atom | Atom | Atom | Angle/°    |
|------|------|------|------------|--|------|------|------|------------|
| C8   | O2   | C25  | 117.56(12) |  | C26  | C24  | C12  | 113.25(14) |
| C9   | O1   | C11  | 116.77(15) |  | C10  | C5   | C6   | 119.73(15) |
| C25  | N2   | C29  | 118.02(14) |  | C10  | C5   | C4   | 121.33(17) |
| C25  | N2   | C28  | 115.19(14) |  | C4   | C5   | C6   | 118.94(17) |
| C29  | N2   | C28  | 113.32(13) |  | C15  | C14  | C13  | 121.68(17) |
| C18  | N1   | C19  | 114.57(15) |  | C34  | C29  | N2   | 117.81(16) |
| C18  | N1   | C23  | 114.23(15) |  | C30  | C29  | N2   | 122.09(16) |
| C19  | N1   | C23  | 112.35(18) |  | C30  | C29  | C34  | 120.05(18) |
| C35  | N3   | C39  | 114.11(18) |  | C9   | C10  | C5   | 120.76(16) |
| C35  | N3   | C36  | 114.75(18) |  | N2   | C28  | C27  | 110.97(15) |
| C39  | N3   | C36  | 104.50(17) |  | C2   | C1   | C6   | 121.36(18) |
| O2   | C8   | C7   | 124.83(14) |  | C16  | C17  | C18  | 121.62(17) |
| O2   | C8   | C9   | 113.76(14) |  | C27  | C26  | C24  | 109.81(15) |
| C7   | C8   | C9   | 121.40(15) |  | C29  | C34  | C35  | 120.68(18) |
| C18  | C13  | C12  | 120.31(14) |  | C33  | C34  | C29  | 118.02(19) |
| C14  | C13  | C18  | 118.24(15) |  | C33  | C34  | C35  | 121.30(18) |
| C14  | C13  | C12  | 121.36(15) |  | C28  | C27  | C26  | 111.54(15) |
| C5   | C6   | C7   | 119.18(15) |  | C15  | C16  | C17  | 119.50(17) |
| C1   | C6   | C7   | 122.75(15) |  | C16  | C15  | C14  | 119.81(18) |
| C1   | C6   | C5   | 118.06(16) |  | C3   | C4   | C5   | 121.10(19) |
| C8   | C7   | C6   | 119.08(15) |  | C31  | C30  | C29  | 120.7(2)   |
| C8   | C7   | C12  | 119.88(14) |  | N3   | C35  | C34  | 112.51(15) |
| C6   | C7   | C12  | 121.04(14) |  | C1   | C2   | C3   | 120.38(19) |
| C13  | C18  | N1   | 118.83(14) |  | C4   | C3   | C2   | 120.11(19) |
| C17  | C18  | N1   | 122.01(15) |  | C32  | C33  | C34  | 121.4(2)   |
| C17  | C18  | C13  | 119.15(16) |  | C32  | C31  | C30  | 119.7(2)   |
| C13  | C12  | C24  | 110.50(13) |  | C31  | C32  | C33  | 120.0(2)   |
| C7   | C12  | C13  | 113.16(13) |  | N1   | C19  | C20  | 110.76(18) |
| C7   | C12  | C24  | 110.48(13) |  | N3   | C39  | C38  | 105.7(2)   |
| O1   | C9   | C8   | 114.33(14) |  | N3   | C36  | C37  | 103.5(2)   |
| C10  | C9   | O1   | 125.89(15) |  | C21  | C22  | C23  | 110.7(3)   |
| C10  | C9   | C8   | 119.78(15) |  | C21  | C20  | C19  | 110.9(2)   |
| O2   | C25  | C24  | 109.42(13) |  | C20  | C21  | C22  | 109.4(2)   |
| N2   | C25  | O2   | 109.95(12) |  | N1   | C23  | C22  | 110.8(2)   |
| N2   | C25  | C24  | 111.33(13) |  | C39  | C38  | C37  | 105.3(2)   |
| C25  | C24  | C12  | 110.36(13) |  | C38  | C37  | C36  | 104.2(2)   |
| C25  | C24  | C26  | 110.83(12) |  |      |      |      |            |

**Table S6** Hydrogen Atom Coordinates ( $\text{\AA}\times 10^4$ ) and Isotropic Displacement Parameters ( $\text{\AA}^2\times 10^3$ ) for **4n**.

| Atom | x        | y        | z        | U(eq) |
|------|----------|----------|----------|-------|
| H12  | 6797.87  | 5590.3   | 1130.03  | 44    |
| H25  | 7747.64  | 7389.28  | 3541.85  | 46    |
| H24  | 7825.2   | 7638.82  | 2071.64  | 46    |
| H14  | 8245.09  | 5154.83  | 3085.77  | 55    |
| H10  | 3005.22  | 2869.51  | 3119.2   | 55    |
| H28A | 5592.38  | 9501.38  | 3339.09  | 57    |
| H28B | 4568.37  | 8199.91  | 3219.16  | 57    |
| H1   | 6795.34  | 3767.16  | 717.97   | 61    |
| H17  | 12008.32 | 6936.87  | 1572.97  | 59    |
| H26A | 5696.5   | 7030.5   | 981.84   | 56    |
| H26B | 4659.04  | 6586.11  | 1694.39  | 56    |
| H27A | 6401.71  | 8963.3   | 1917.48  | 64    |
| H27B | 4643.03  | 8426.76  | 1746.35  | 64    |
| H16  | 12568.94 | 6251.99  | 2757.64  | 64    |
| H15  | 10684.45 | 5365.14  | 3522.06  | 61    |
| H4   | 3123.49  | 1209.34  | 1839.22  | 69    |
| H30  | 5479.72  | 7778.48  | 4922.19  | 68    |
| H35A | 9955.79  | 11378.69 | 4638.09  | 69    |
| H35B | 9320.58  | 10197.89 | 3816.74  | 69    |
| H2   | 6000.75  | 1788.74  | 5.32     | 76    |
| H3   | 4124.56  | 509.39   | 547.44   | 81    |
| H33  | 9051.21  | 11486.91 | 6125.81  | 76    |
| H11A | 1872.17  | 3827.79  | 4207.83  | 106   |
| H11B | 2634.57  | 4796.65  | 5165.82  | 106   |
| H11C | 3347.97  | 3864.14  | 4728.9   | 106   |
| H31  | 5862.94  | 8736.31  | 6510.02  | 85    |
| H32  | 7631.58  | 10600.2  | 7105.82  | 85    |
| H19A | 8535.08  | 5390.25  | -94.01   | 88    |
| H19B | 10165.08 | 6122.09  | -214.23  | 88    |
| H39A | 9031.08  | 12839.97 | 4778.87  | 88    |
| H39B | 7307.33  | 12155.04 | 4748.28  | 88    |
| H36A | 8760.25  | 10916.62 | 2466.63  | 89    |
| H36B | 9983.15  | 12047.3  | 3170.8   | 89    |
| H22A | 8821.2   | 8671.27  | 485.83   | 109   |
| H22B | 10459.95 | 9404.65  | 381.41   | 109   |
| H20A | 8480.66  | 6117.08  | -1381.55 | 114   |
| H20B | 7573.14  | 6600.92  | -626.09  | 114   |
| H21A | 9089.57  | 8150.36  | -1090.1  | 108   |
| H21B | 10516.36 | 7868.15  | -862.46  | 108   |
| H23A | 11384.71 | 8144.02  | 863.91   | 103   |
| H23B | 10484.38 | 8614.12  | 1631.44  | 103   |
| H38A | 8322.39  | 13768.05 | 3909.02  | 124   |
| H38B | 6673.97  | 12835.79 | 3652.04  | 124   |
| H37A | 8733.91  | 12926.85 | 2499.91  | 132   |
| H37B | 7193.54  | 11869.52 | 2323.53  | 132   |



## NMR Spectra

### $^1\text{H}$ NMR of Compound **4a** (400 MHz, $\text{CDCl}_3$ )

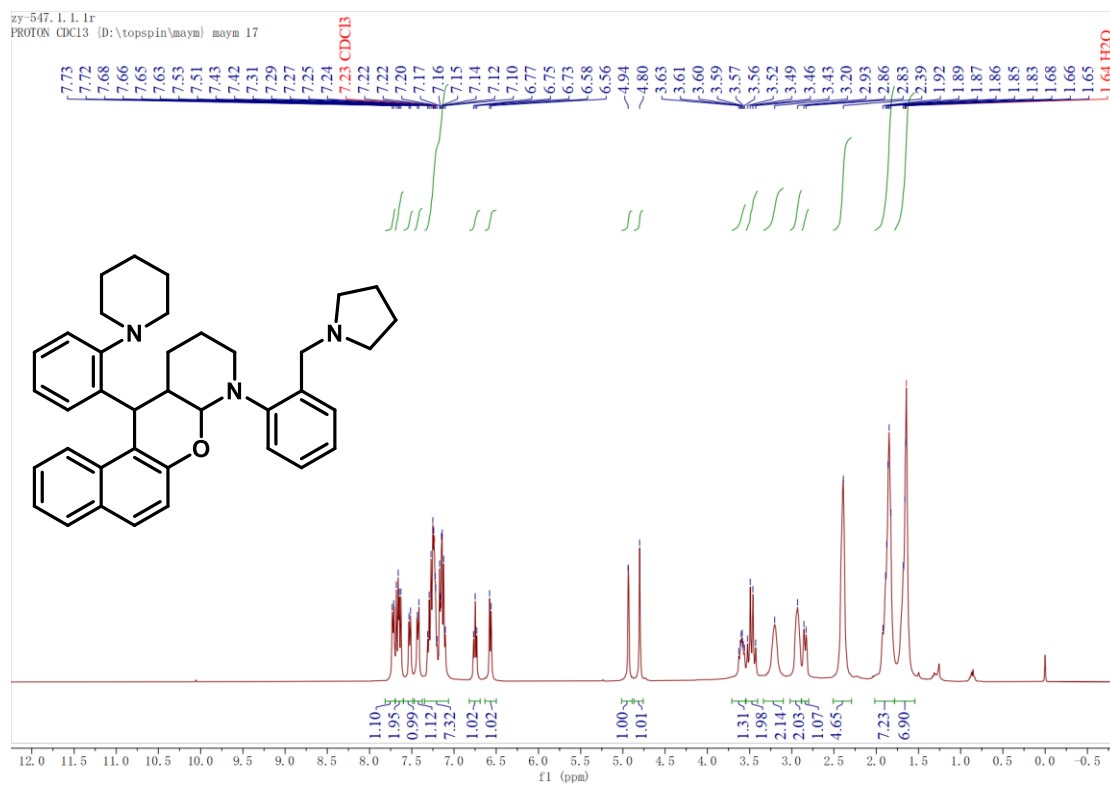

### $^{13}\text{C}$ NMR of Compound **4a** (101 MHz, $\text{CDCl}_3$ )

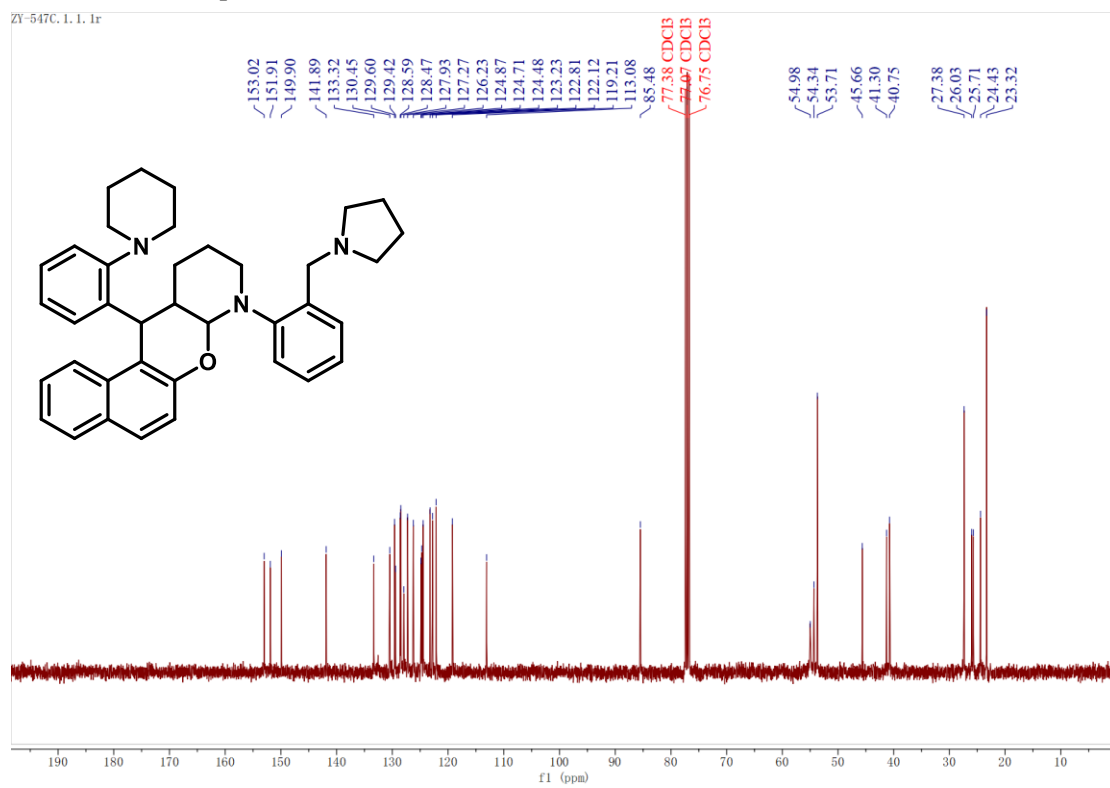

### <sup>1</sup>H NMR of Compound **4b** (400 MHz, CDCl<sub>3</sub>)

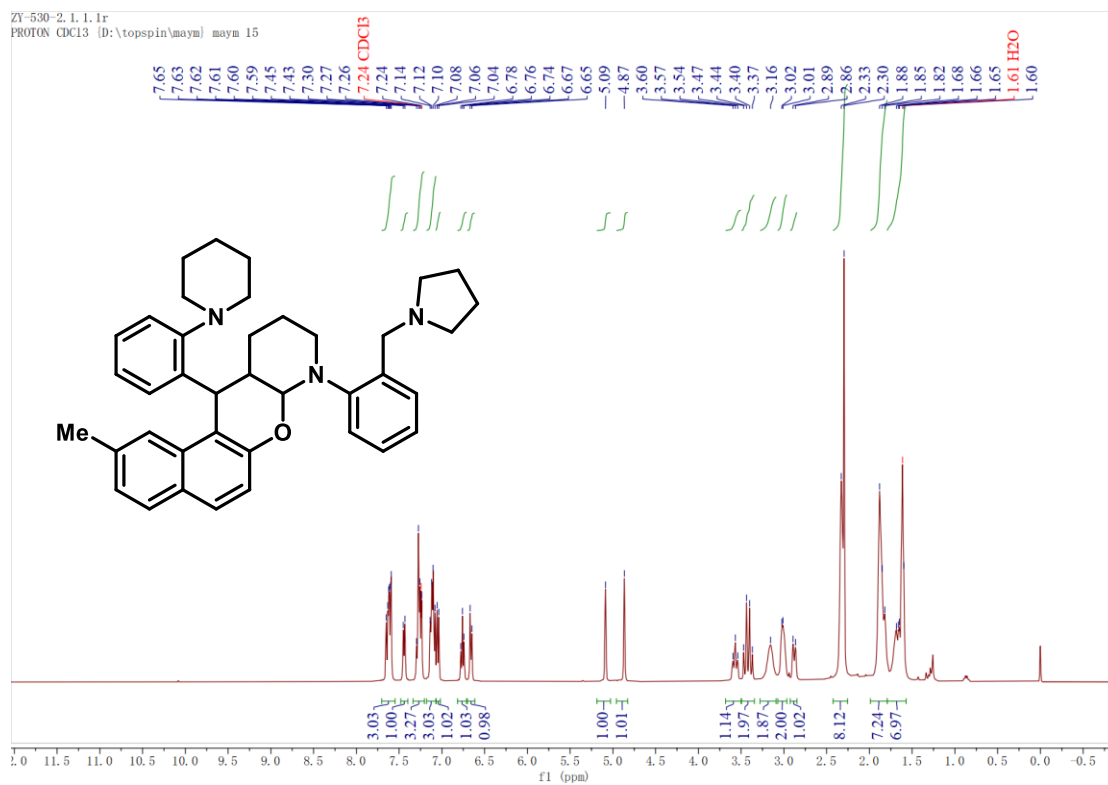

### <sup>13</sup>C NMR of Compound **4b** (101 MHz, CDCl<sub>3</sub>)

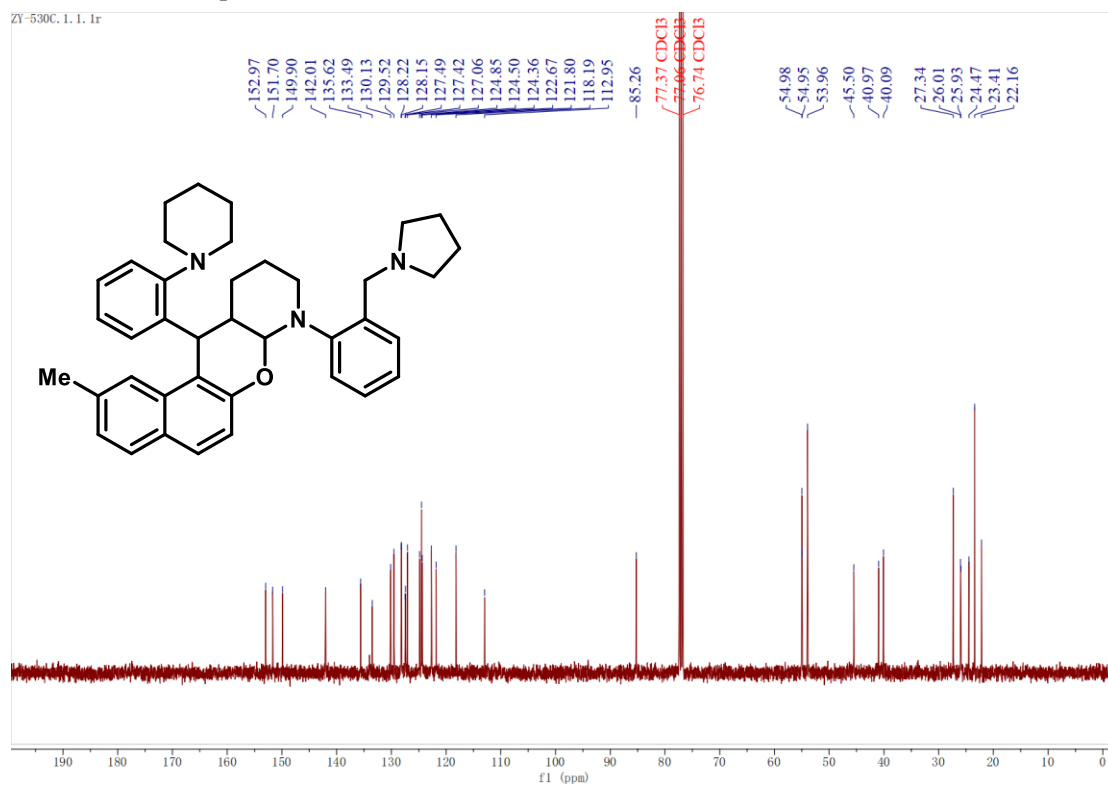

### $^1\text{H}$ NMR of Compound **4c** (400 MHz, $\text{CDCl}_3$ )

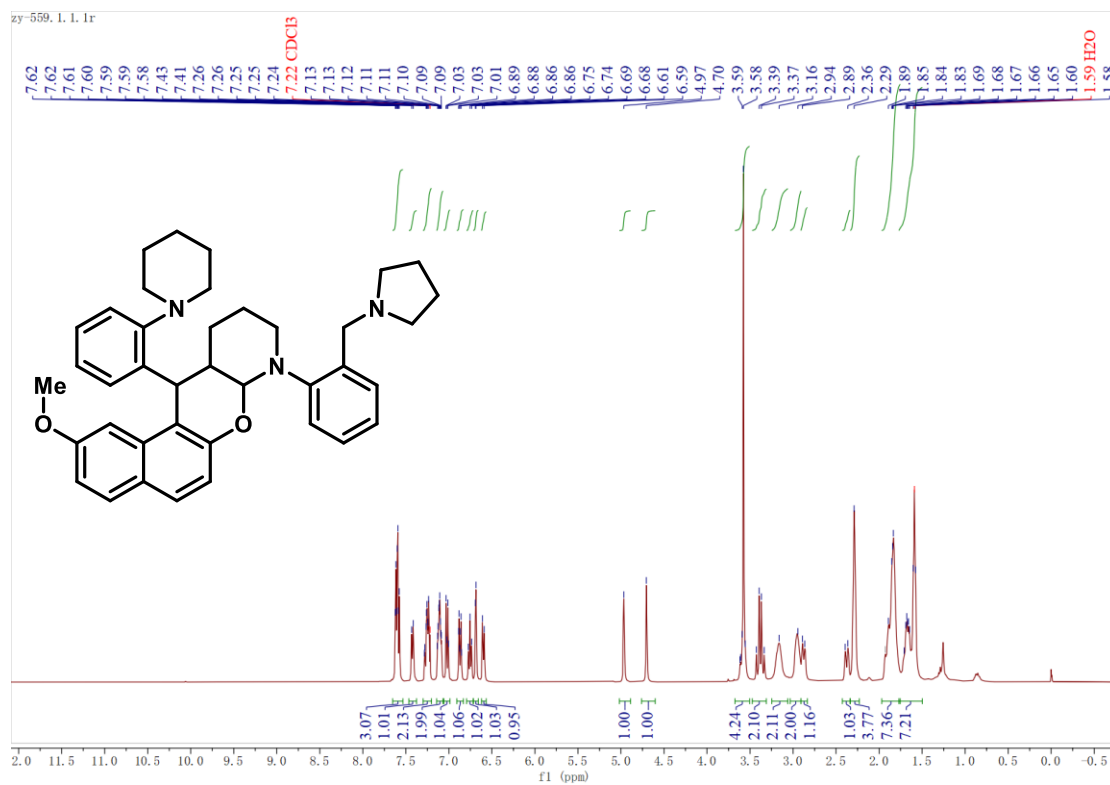

### $^{13}\text{C}$ NMR of Compound **4c** (101 MHz, $\text{CDCl}_3$ )

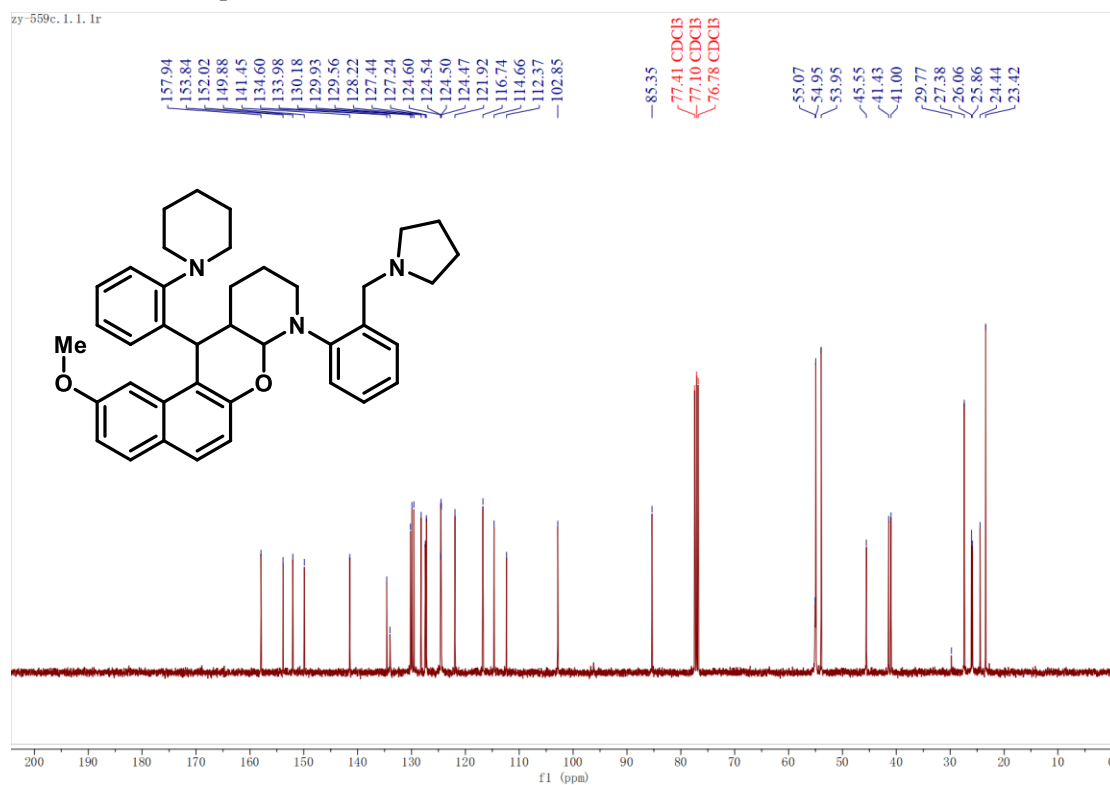

<sup>1</sup>H NMR of Compound **4d** (400 MHz, CDCl<sub>3</sub>)

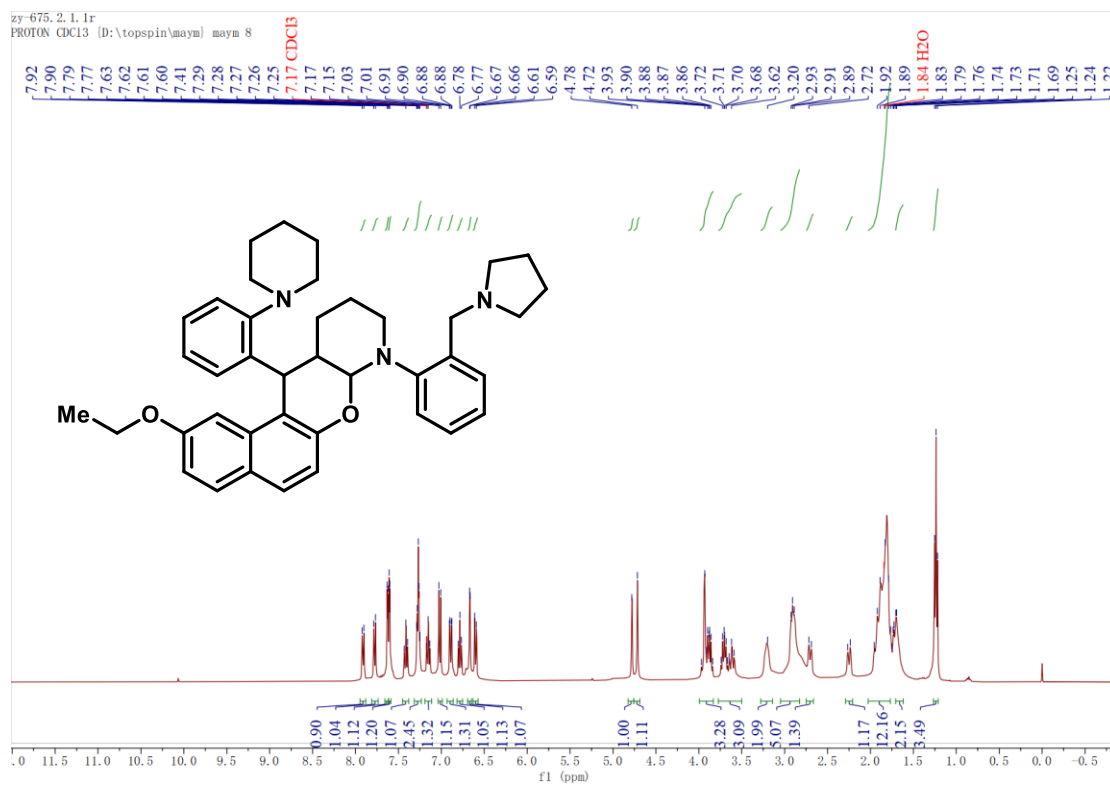

<sup>13</sup>C NMR of Compound **4d** (101 MHz, CDCl<sub>3</sub>)

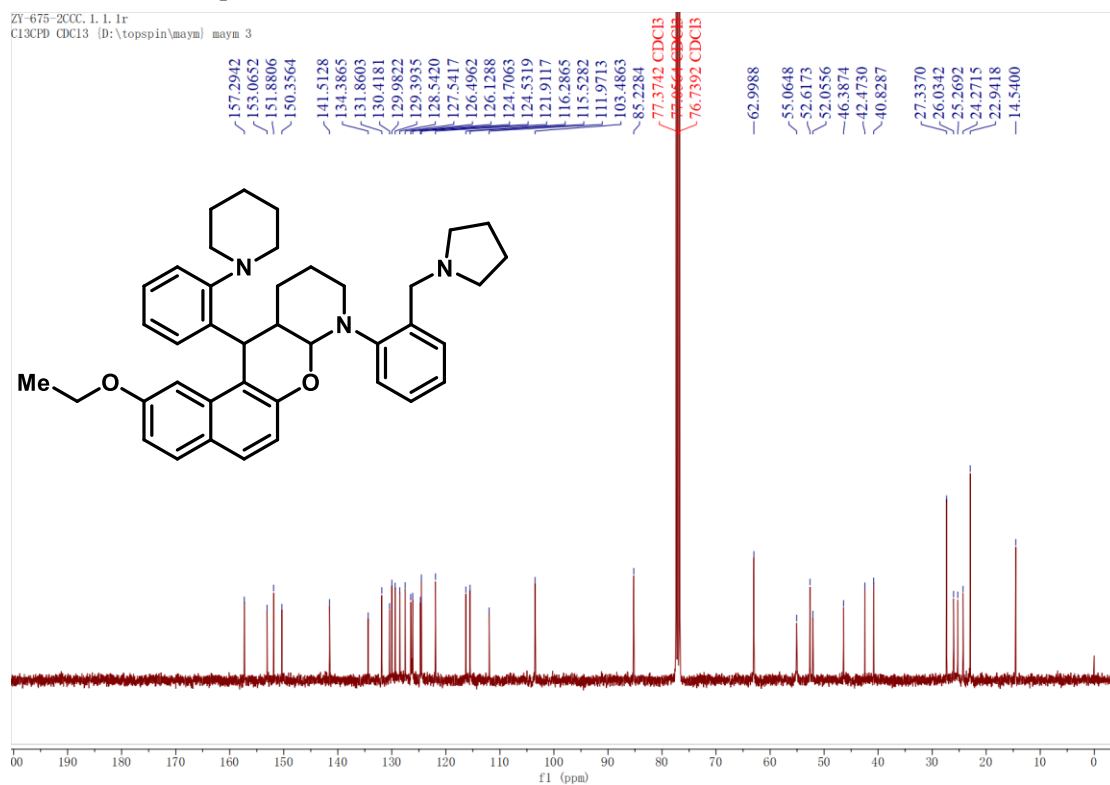

### $^1\text{H}$ NMR of Compound **4e** (400 MHz, $\text{CDCl}_3$ )

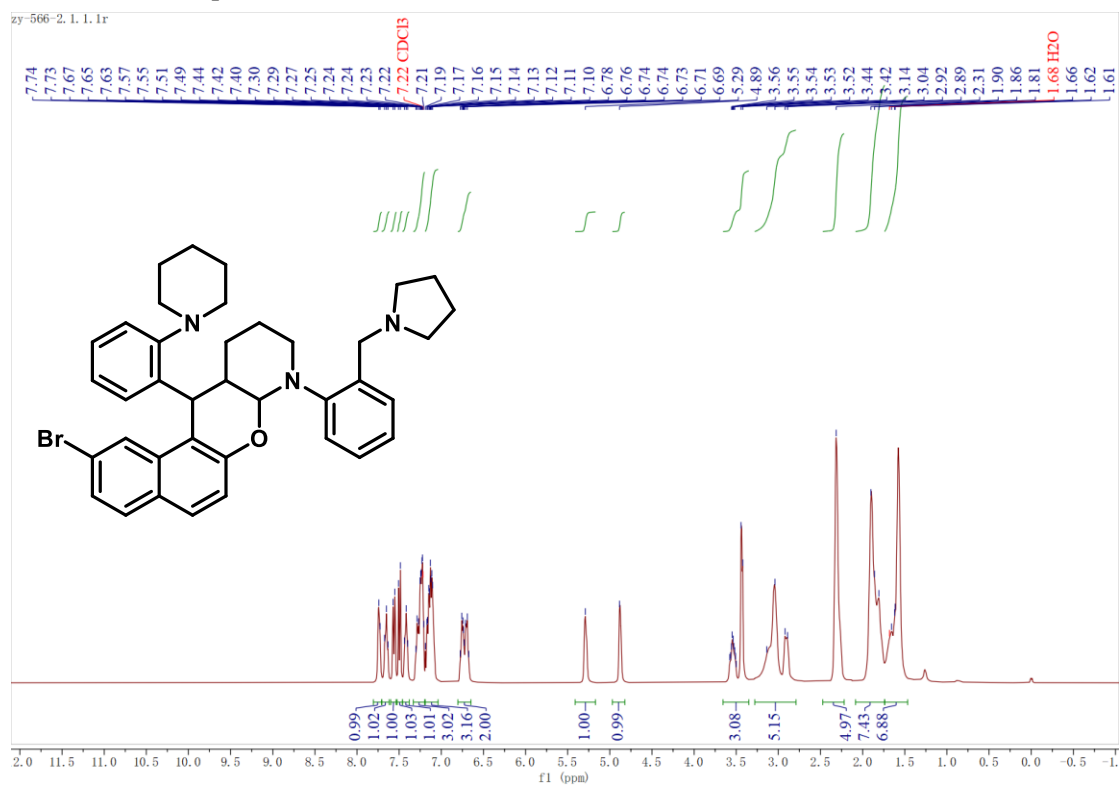

### $^{13}\text{C}$ NMR of Compound **4e** (101 MHz, $\text{CDCl}_3$ )

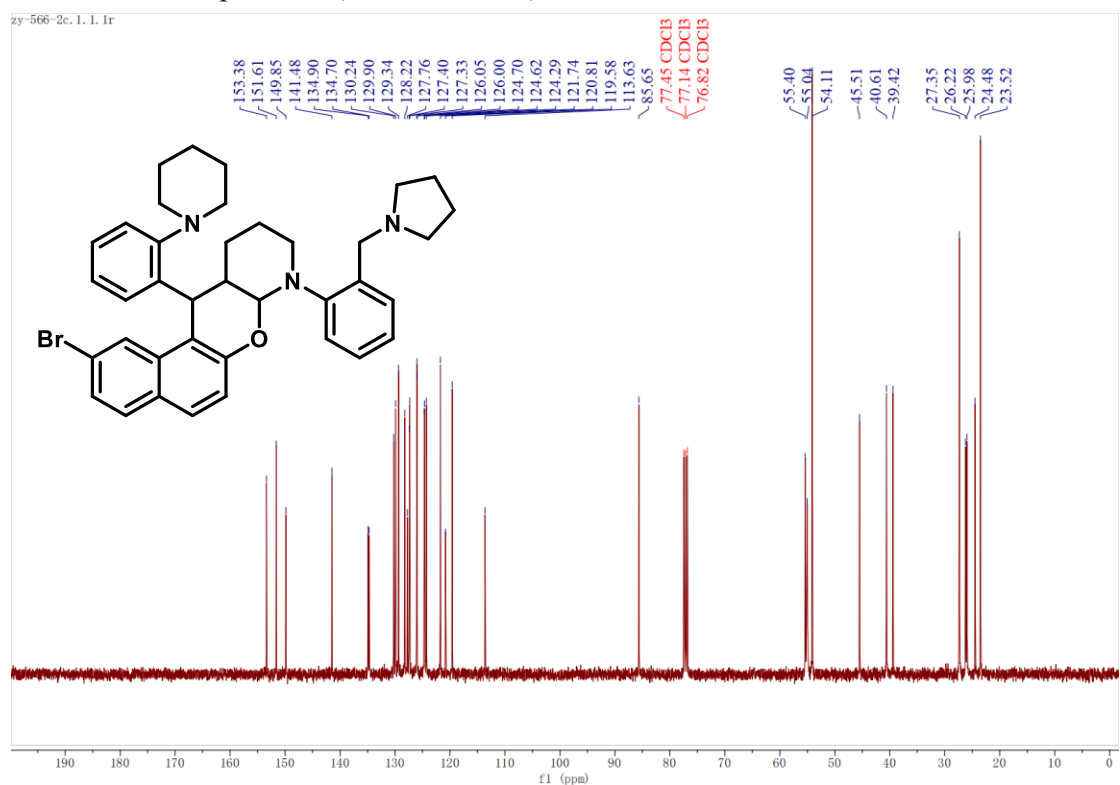

### <sup>1</sup>H NMR of Compound **4f** (400 MHz, CDCl<sub>3</sub>)

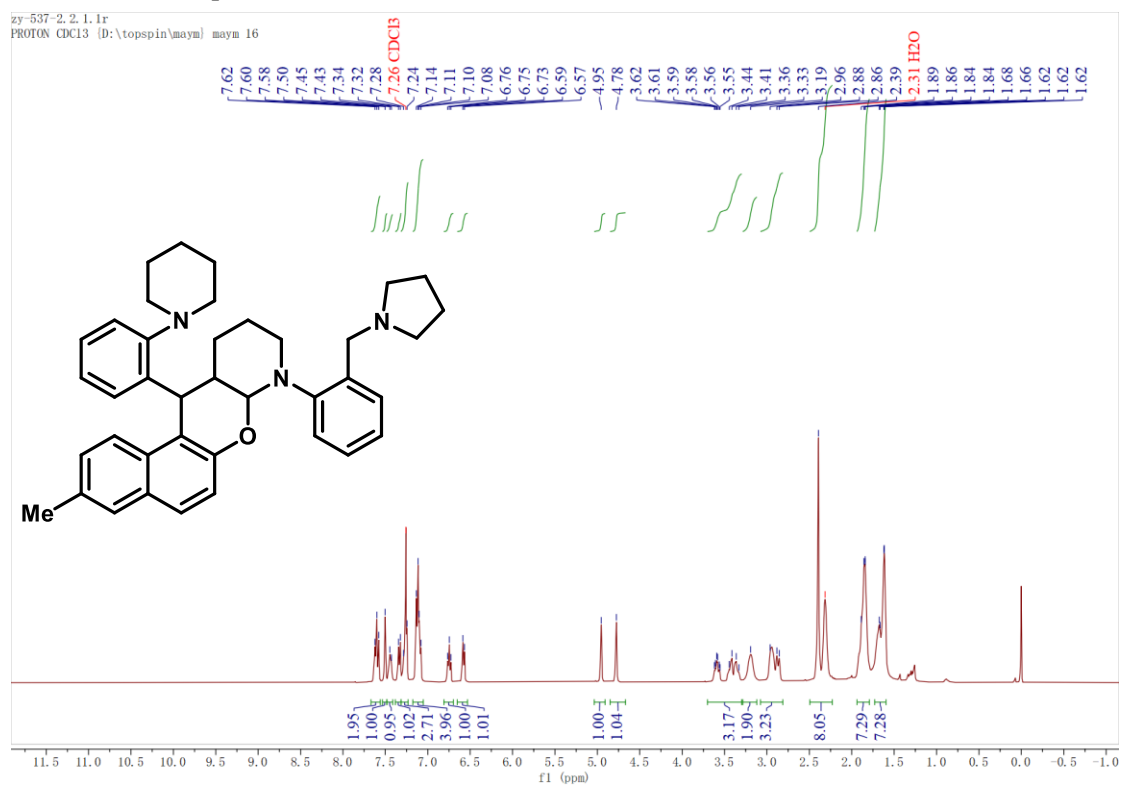

### <sup>13</sup>C NMR of Compound **4f** (101 MHz, CDCl<sub>3</sub>)

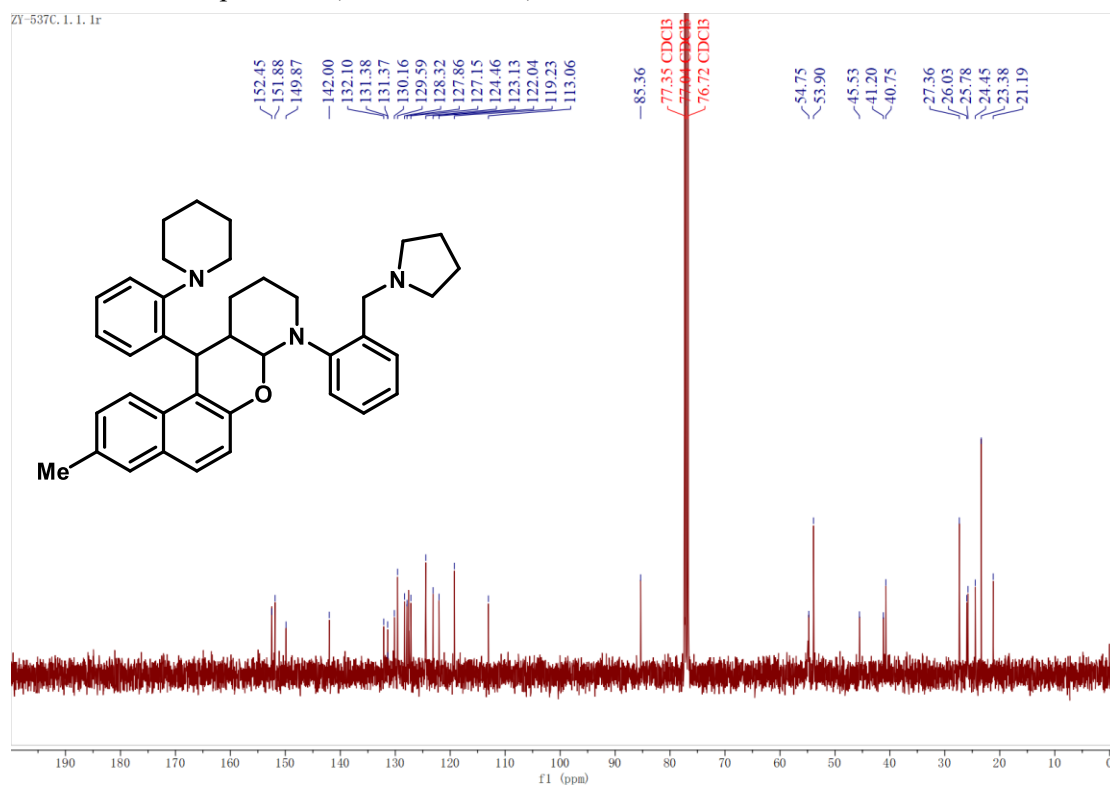

### <sup>1</sup>H NMR of Compound **4g** (400 MHz, CDCl<sub>3</sub>)

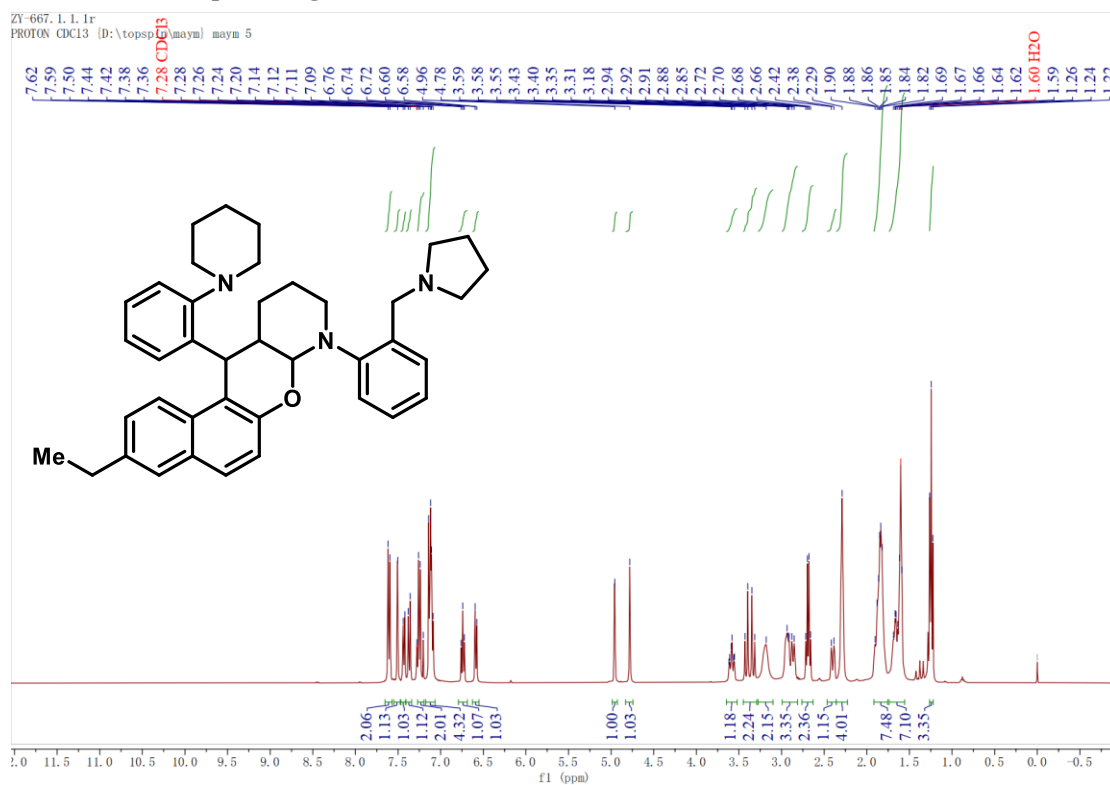

### <sup>13</sup>C NMR of Compound **4g** (101 MHz, CDCl<sub>3</sub>)

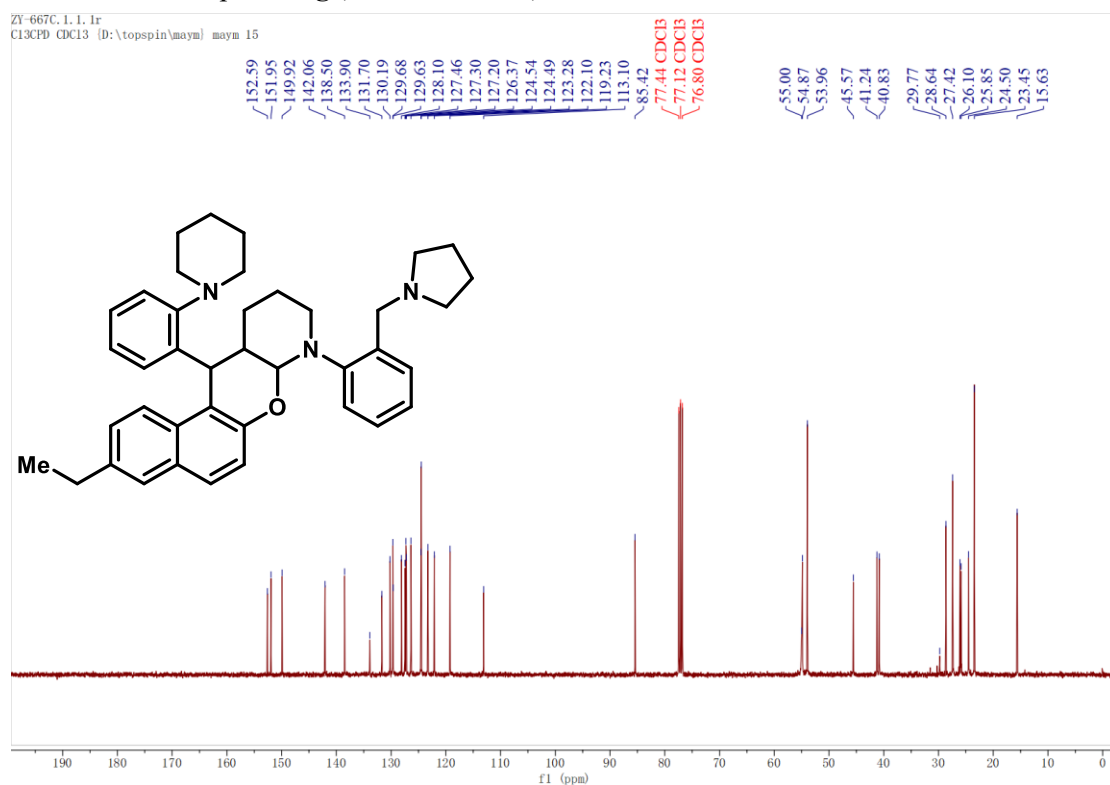

### $^1\text{H}$ NMR of Compound **4h** (400 MHz, $\text{CDCl}_3$ )

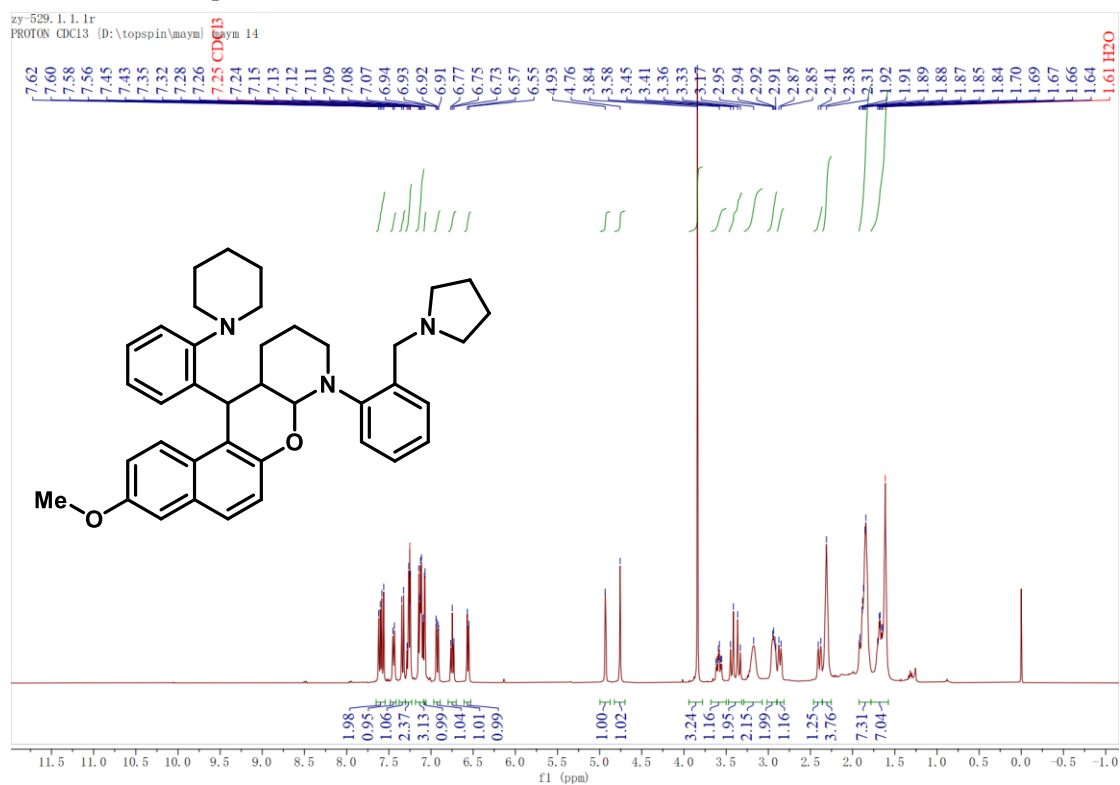

### $^{13}\text{C}$ NMR of Compound **4h** (101 MHz, $\text{CDCl}_3$ )

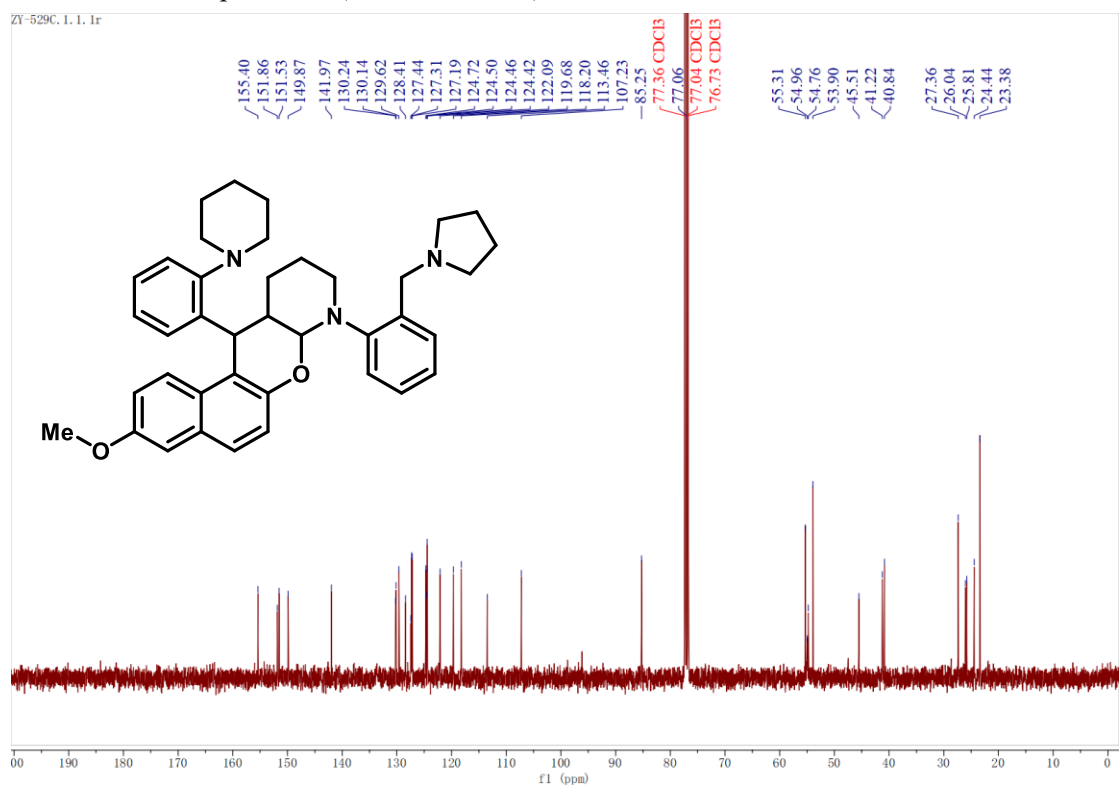



]

### <sup>1</sup>H NMR of Compound **4i** (400 MHz, CDCl<sub>3</sub>)

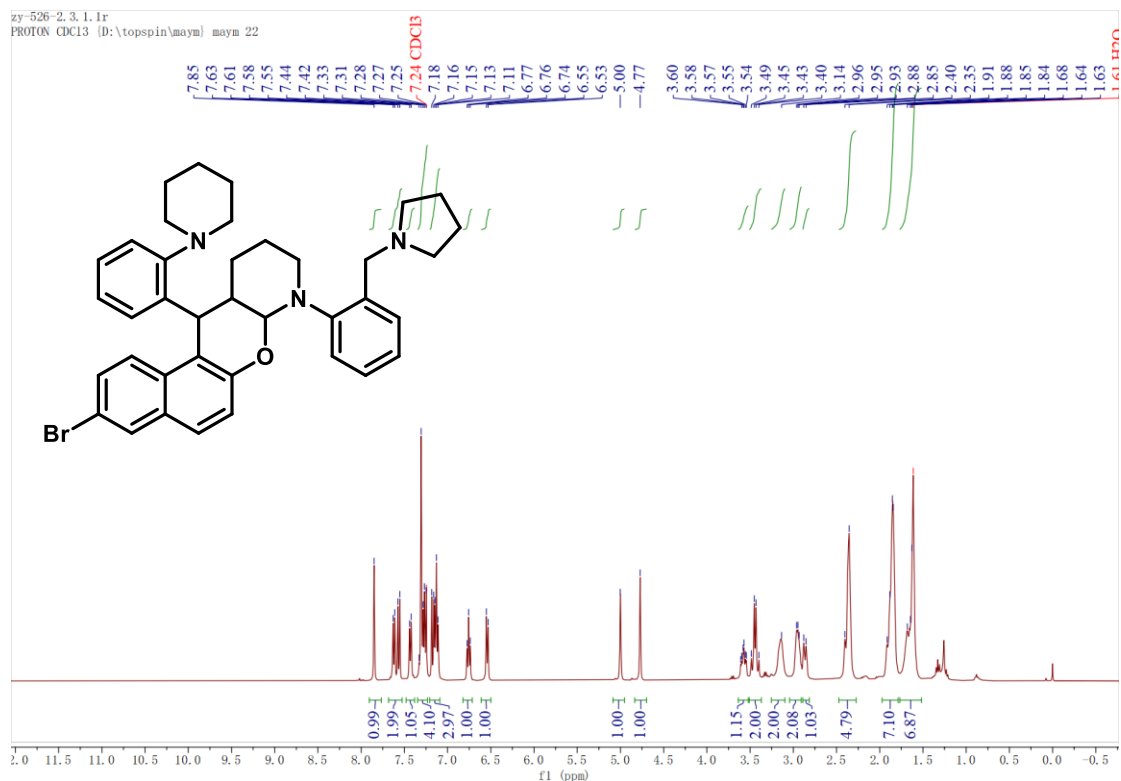

### <sup>13</sup>C NMR of Compound **4i** (101 MHz, CDCl<sub>3</sub>)

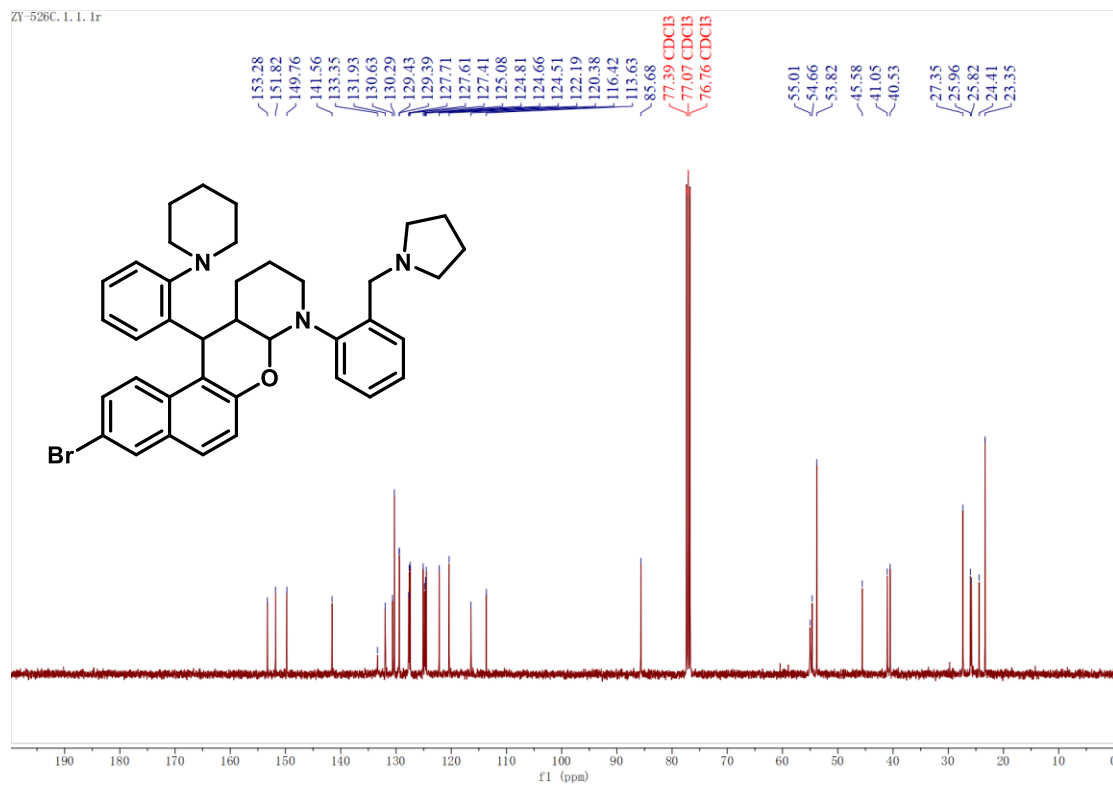

### <sup>1</sup>H NMR of Compound **4j** (400 MHz, CDCl<sub>3</sub>)

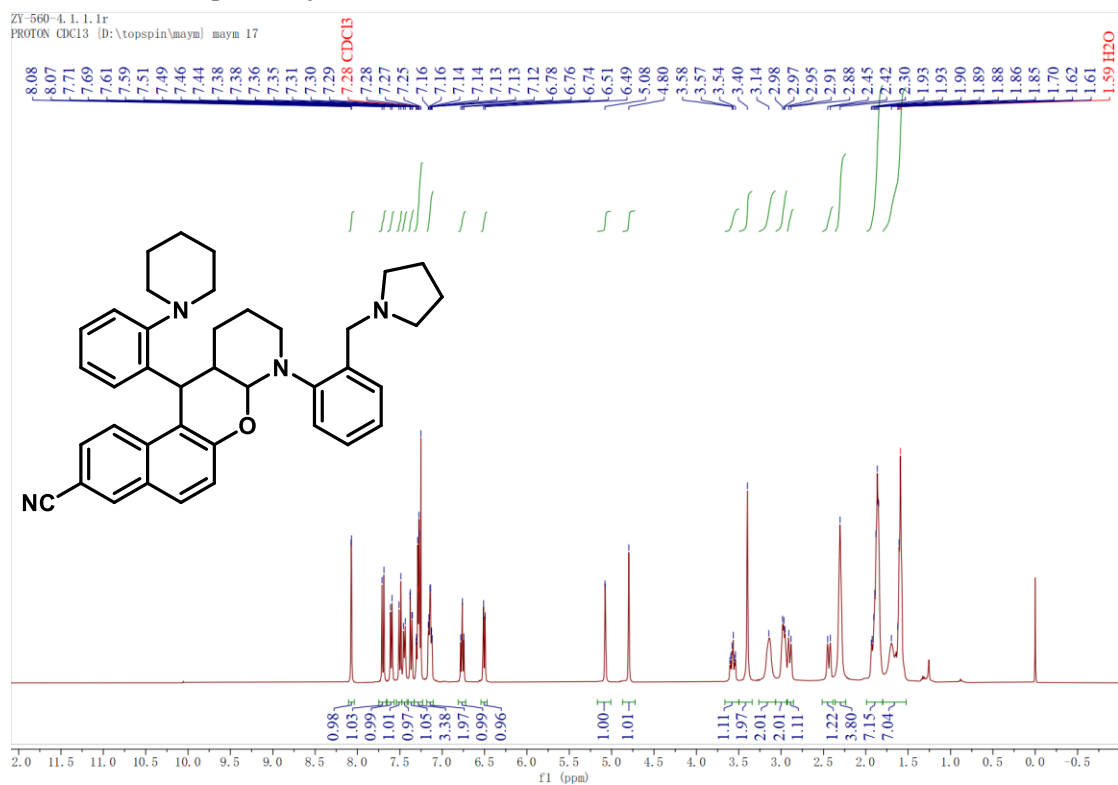

### <sup>13</sup>C NMR of Compound **4j** (101 MHz, CDCl<sub>3</sub>)

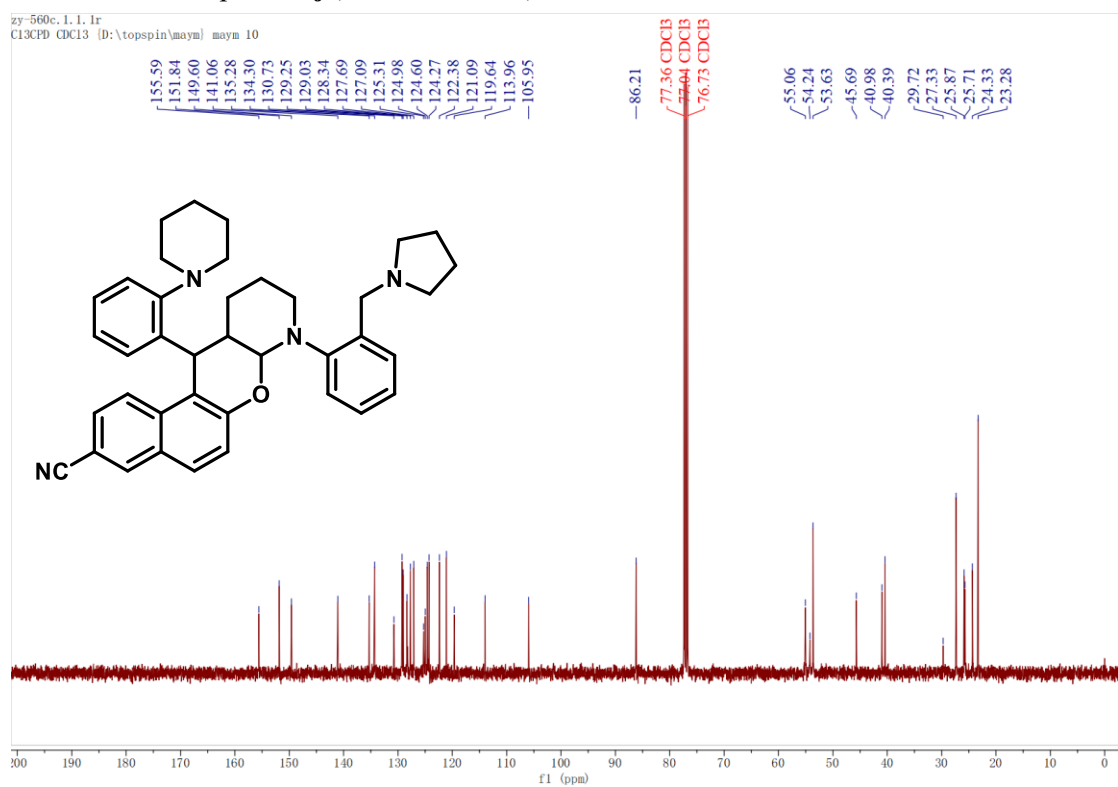

### <sup>1</sup>H NMR of Compound **4k** (400 MHz, CDCl<sub>3</sub>)

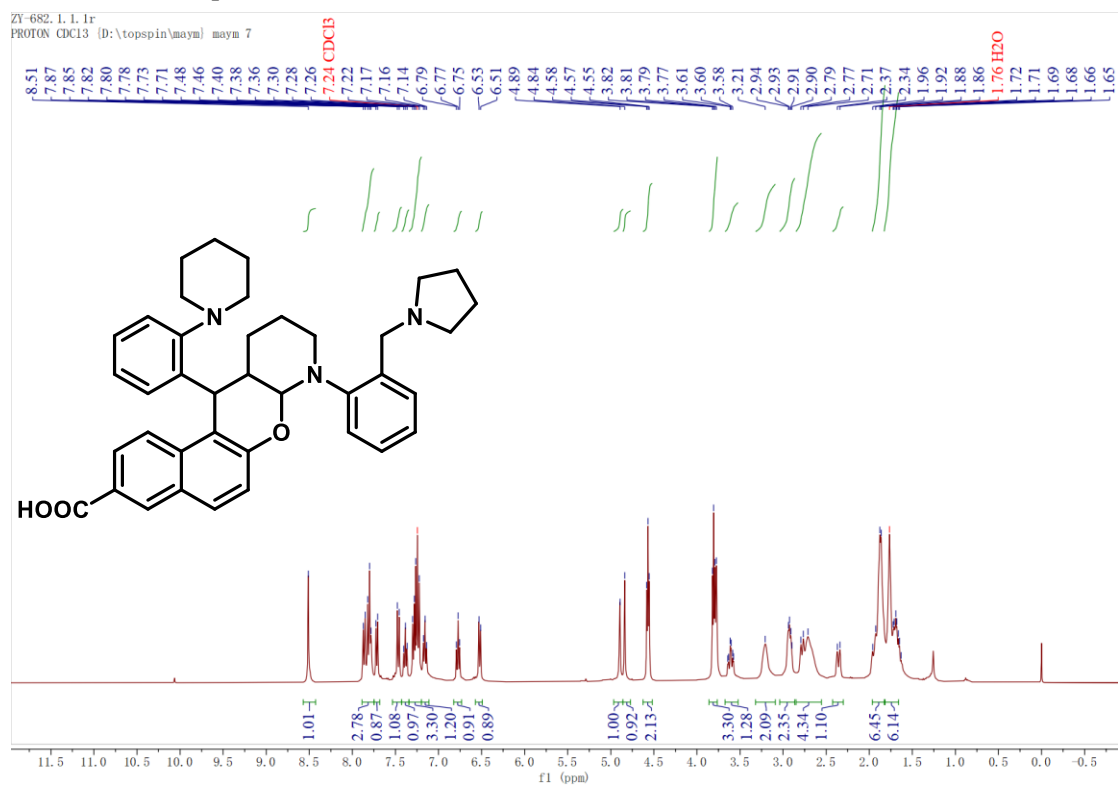

### <sup>13</sup>C NMR of Compound **4k** (101 MHz, CDCl<sub>3</sub>)

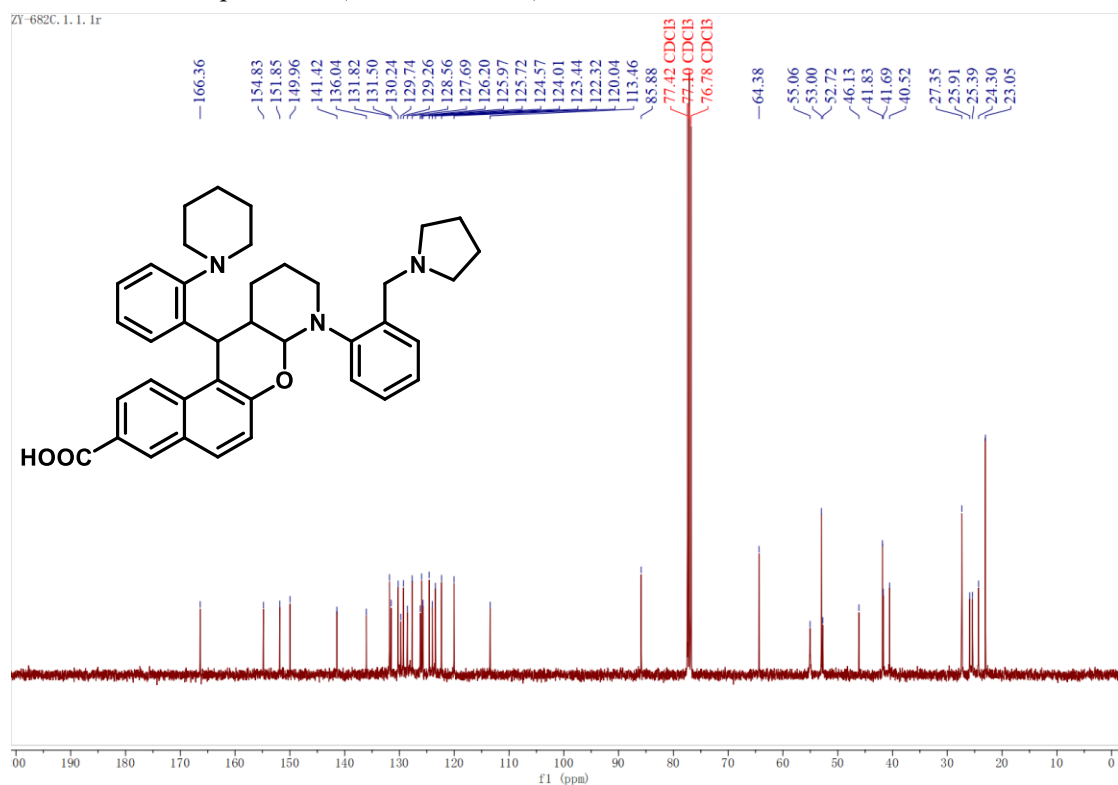

### $^1\text{H}$ NMR of Compound **4l** (400 MHz, $\text{CDCl}_3$ )

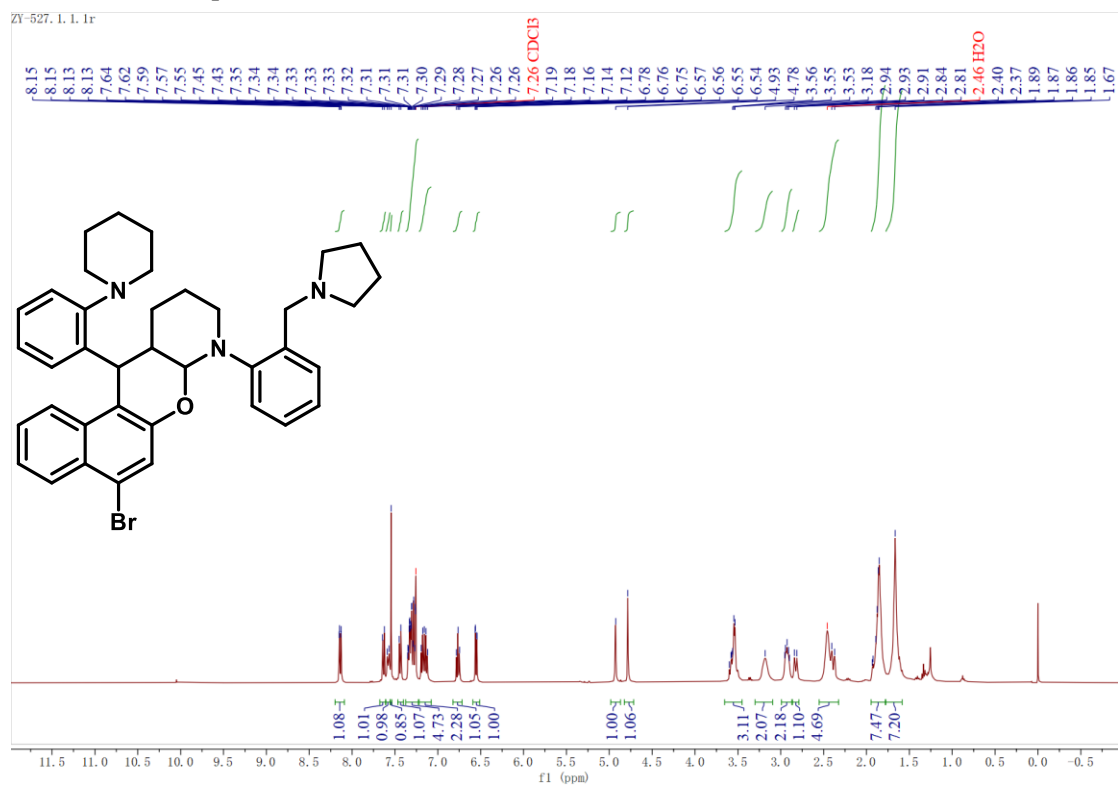

### $^{13}\text{C}$ NMR of Compound **4l** (101 MHz, $\text{CDCl}_3$ )

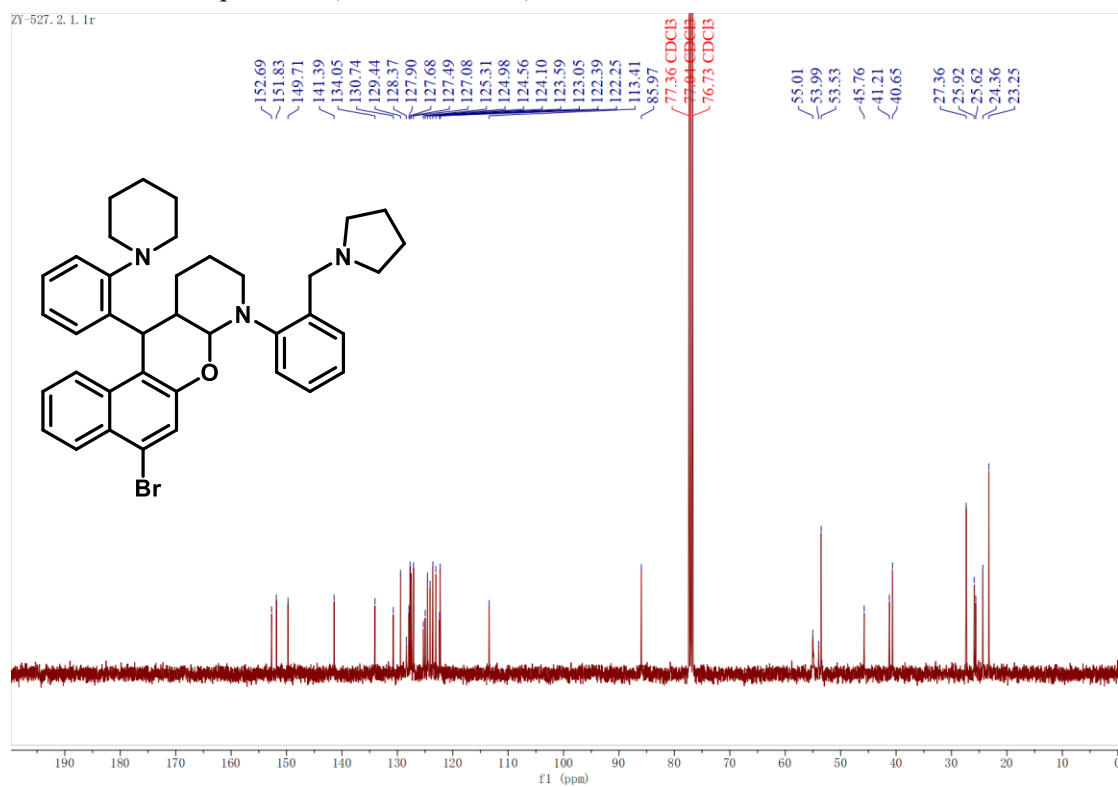

### <sup>1</sup>H NMR of Compound **4m** (400 MHz, CDCl<sub>3</sub>)

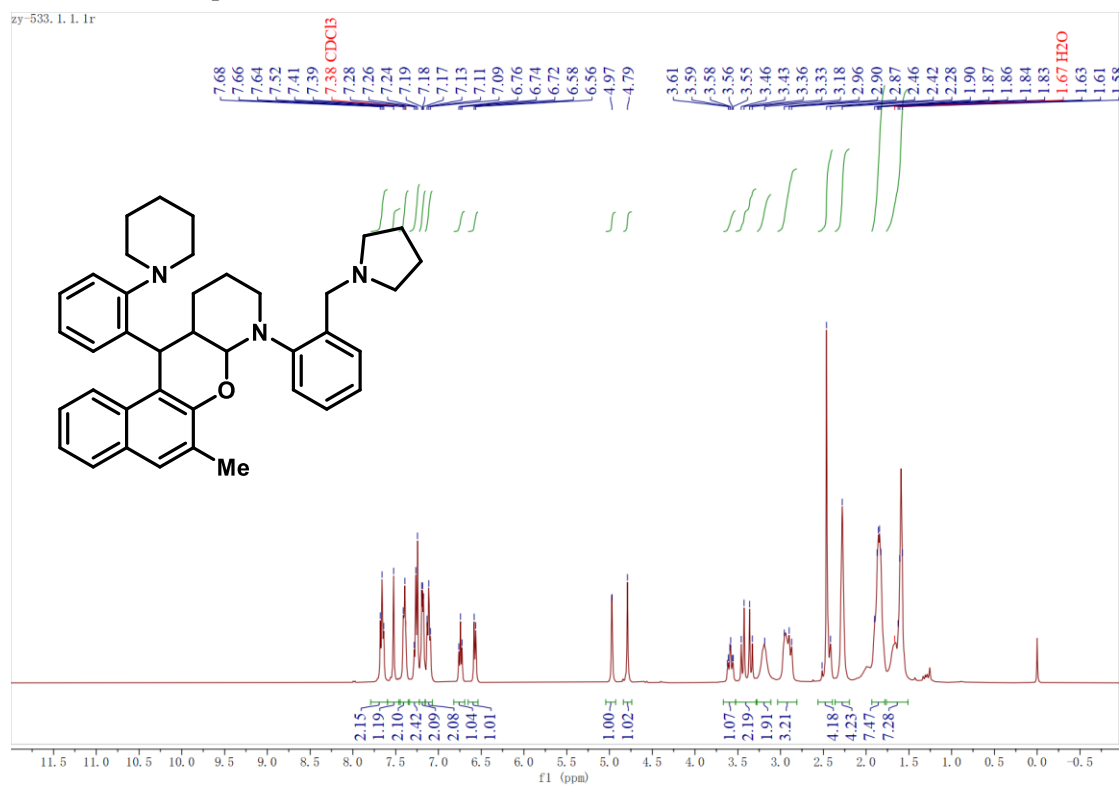

### <sup>13</sup>C NMR of Compound **4m** (101 MHz, CDCl<sub>3</sub>)

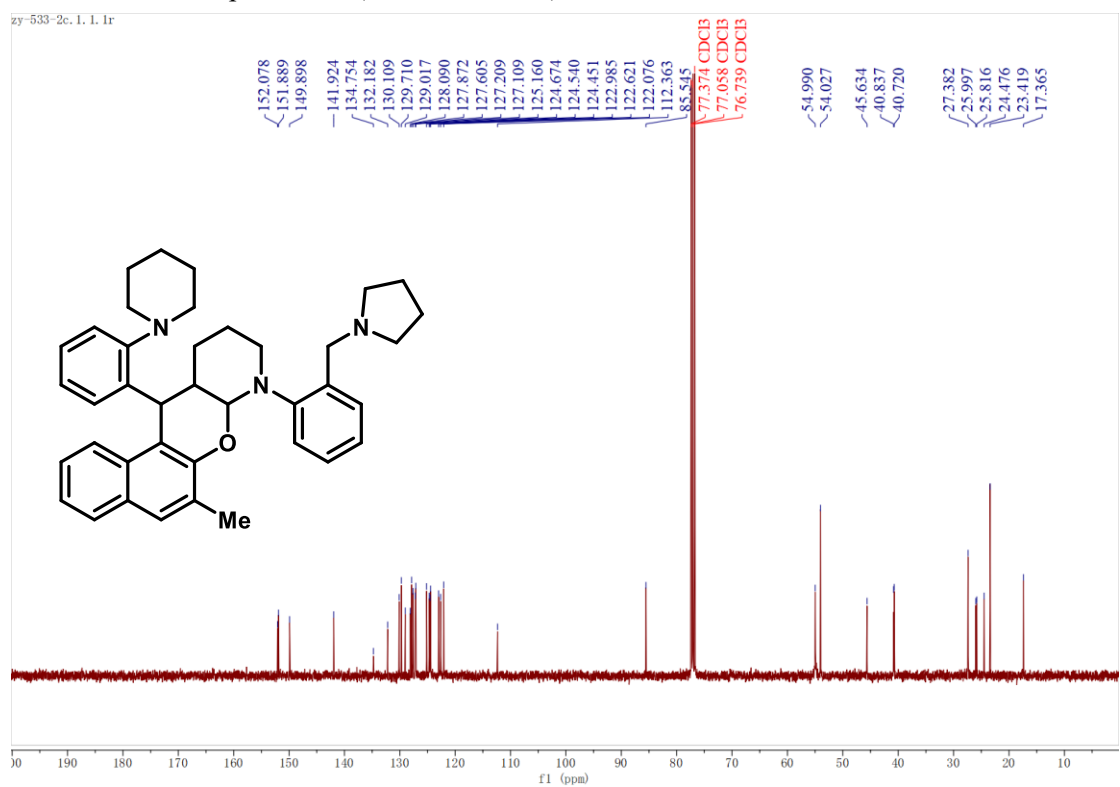

### <sup>1</sup>H NMR of Compound **4n** (400 MHz, CDCl<sub>3</sub>)

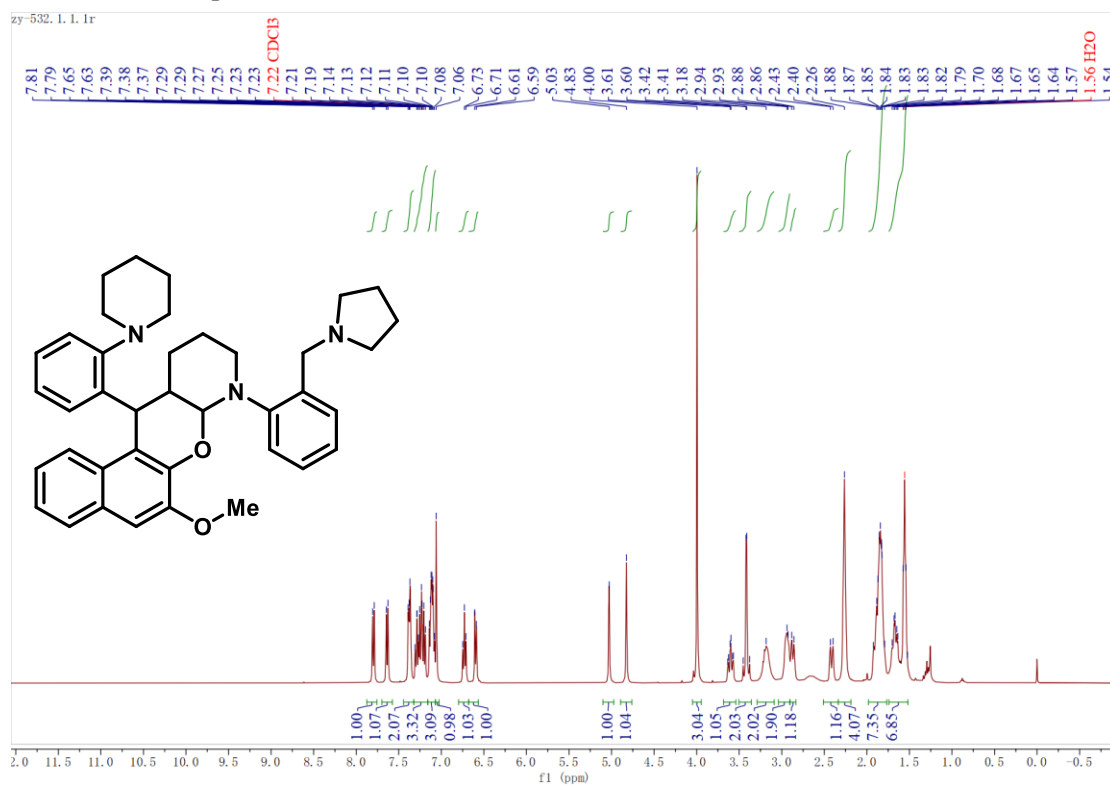

### <sup>13</sup>C NMR of Compound **4n** (101 MHz, CDCl<sub>3</sub>)

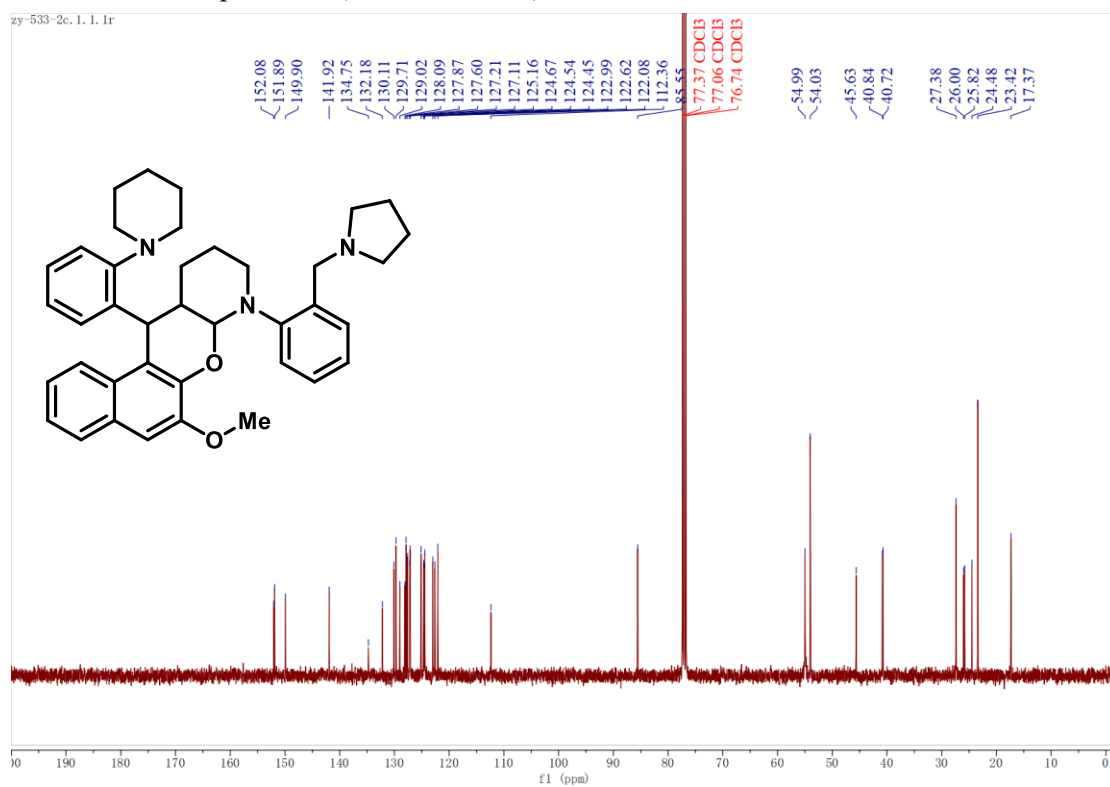

# <sup>1</sup>H NMR of Compound **4o** (400 MHz, CDCl<sub>3</sub>)

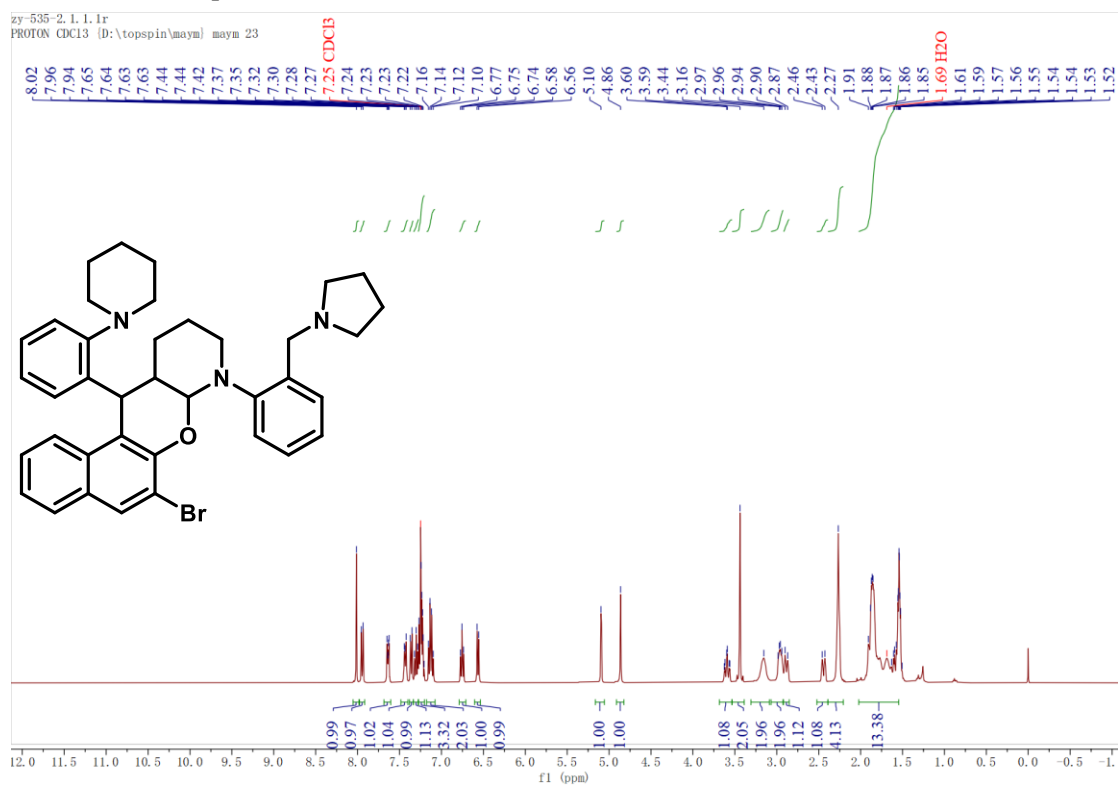

# <sup>13</sup>C NMR of Compound **4o** (101 MHz, CDCl<sub>3</sub>)

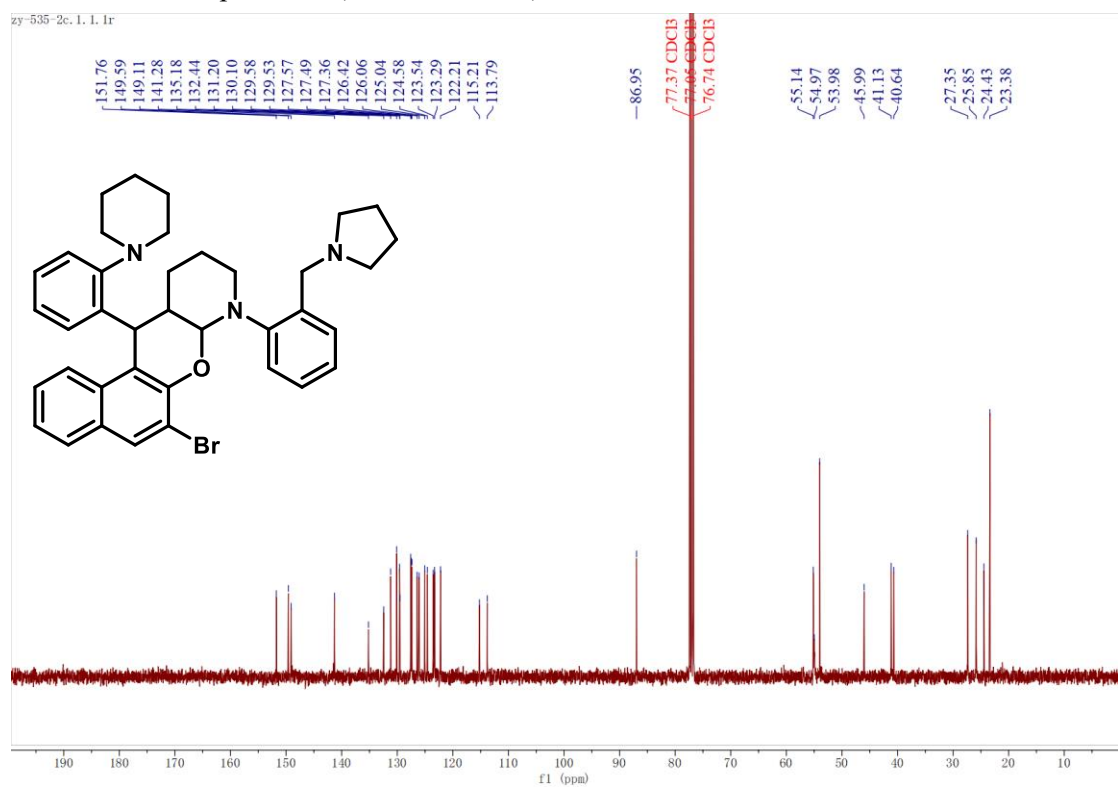

### <sup>1</sup>H NMR of Compound **4p** (400 MHz, CDCl<sub>3</sub>)

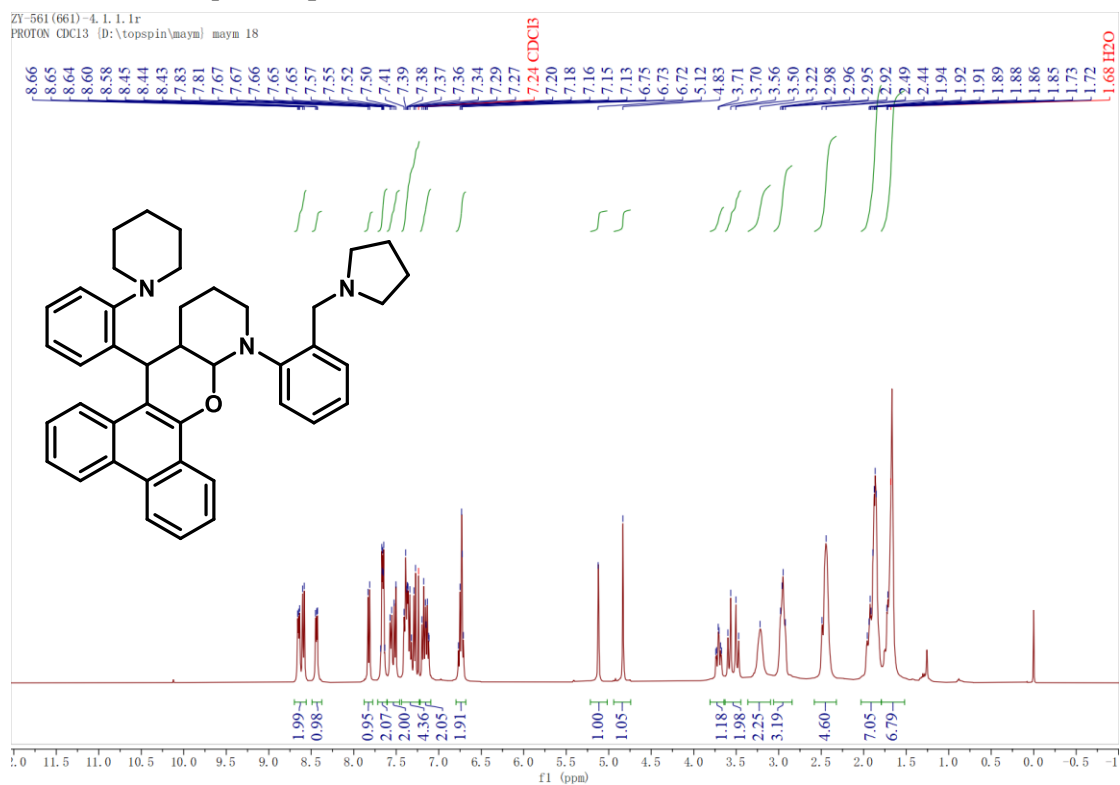

### <sup>13</sup>C NMR of Compound **4p** (101 MHz, CDCl<sub>3</sub>)

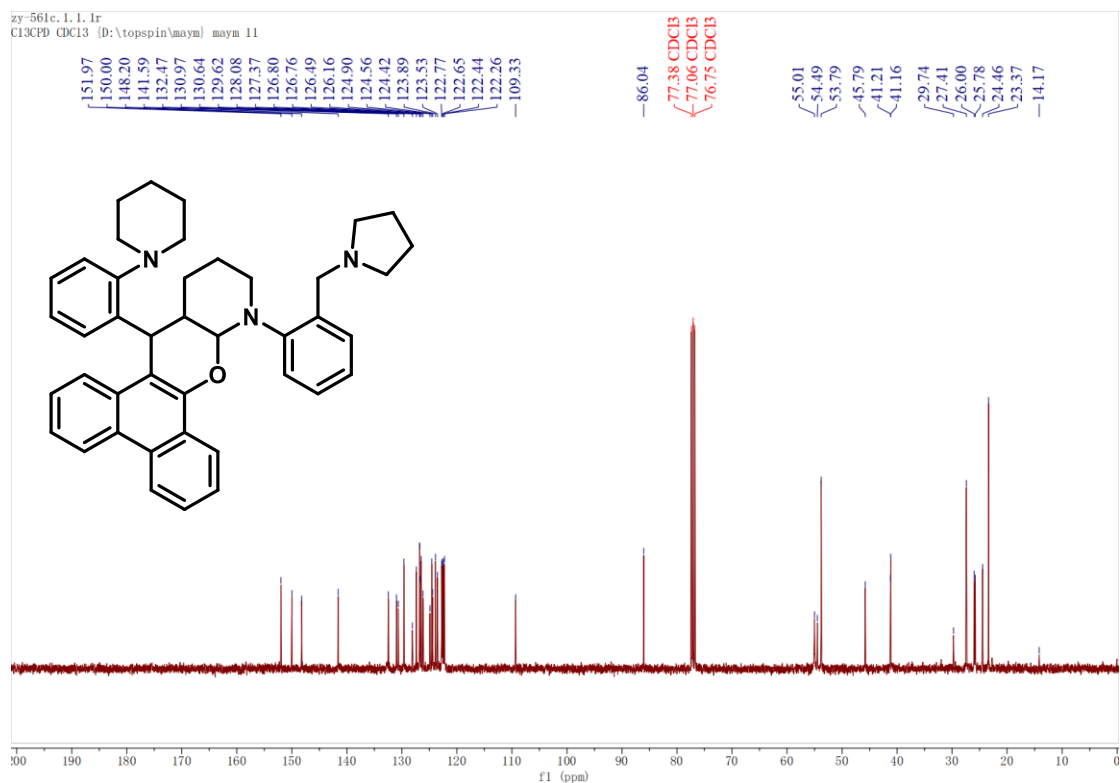



<sup>1</sup>H NMR of Compound **4q** (400 MHz, CDCl<sub>3</sub>)

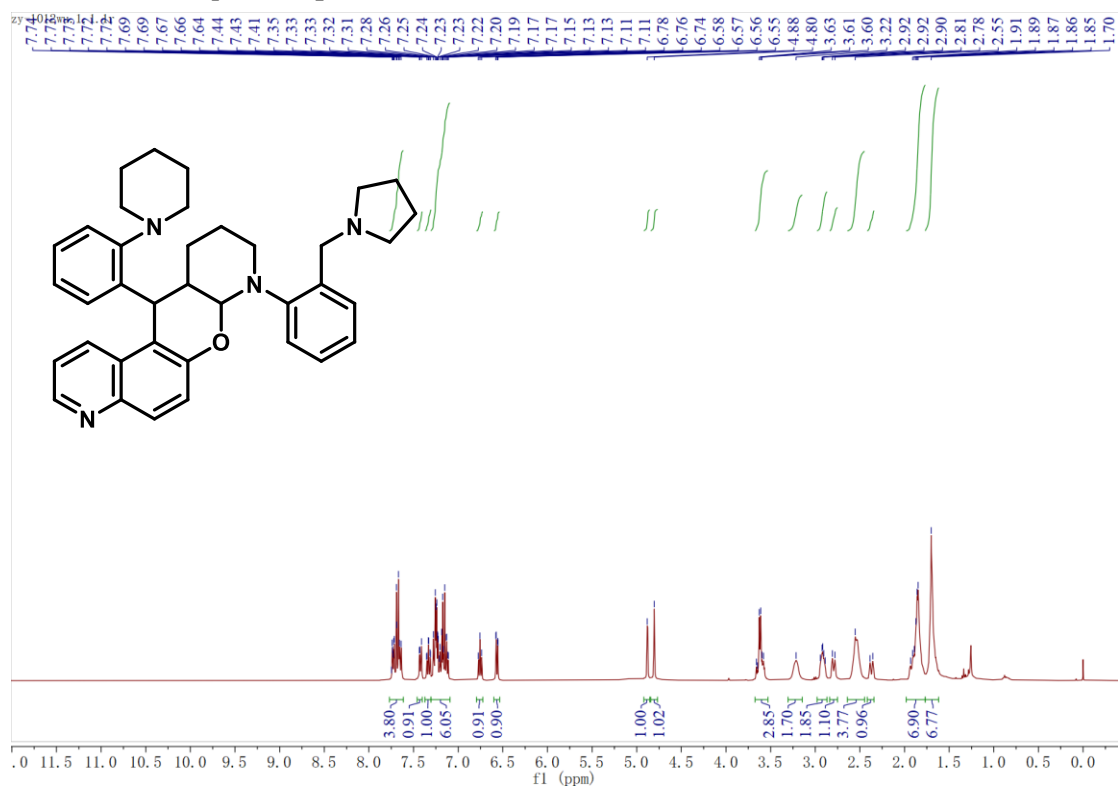

<sup>13</sup>C NMR of Compound **4q** (101 MHz, CDCl<sub>3</sub>)

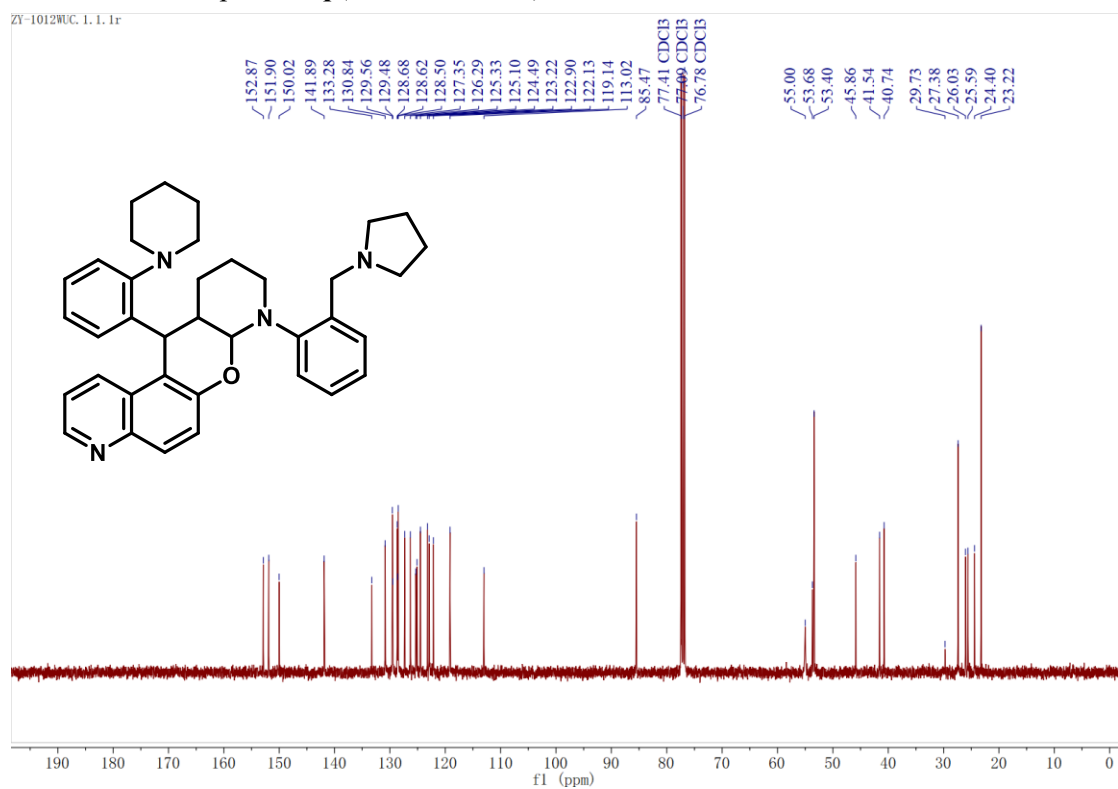

### $^1\text{H}$ NMR of Compound **4r** (400 MHz, $\text{CDCl}_3$ )

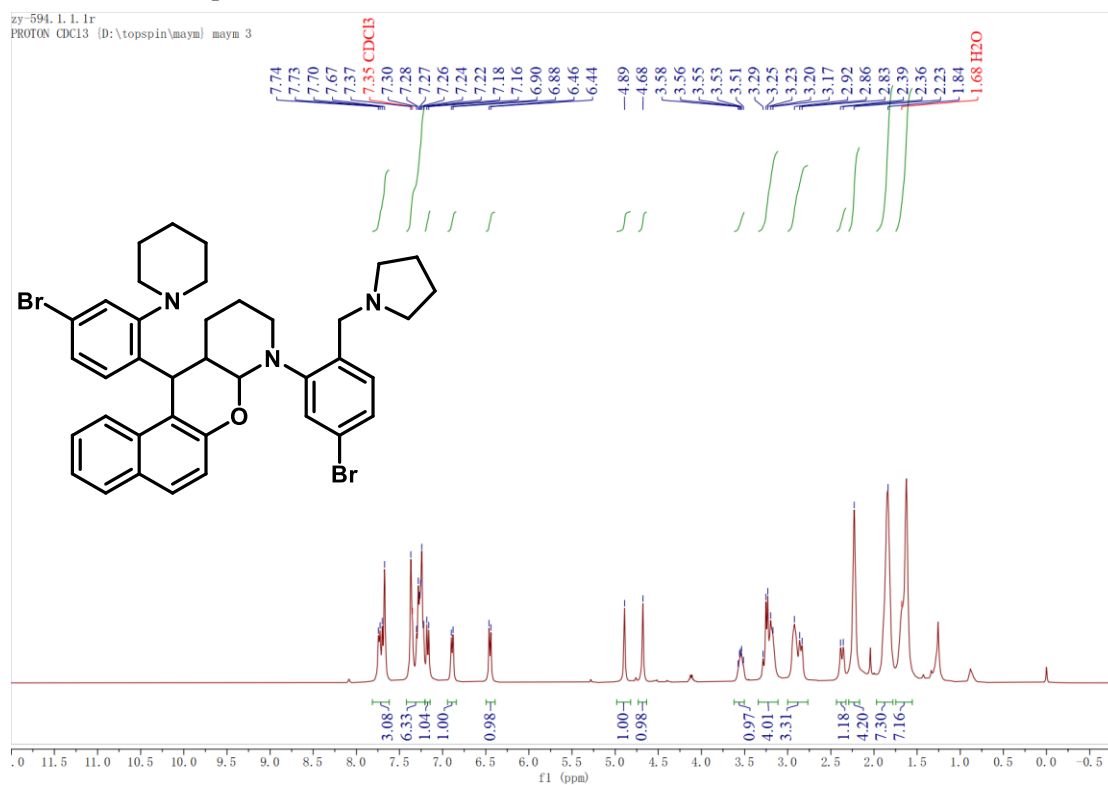

### $^{13}\text{C}$ NMR of Compound **4r** (101 MHz, $\text{CDCl}_3$ )

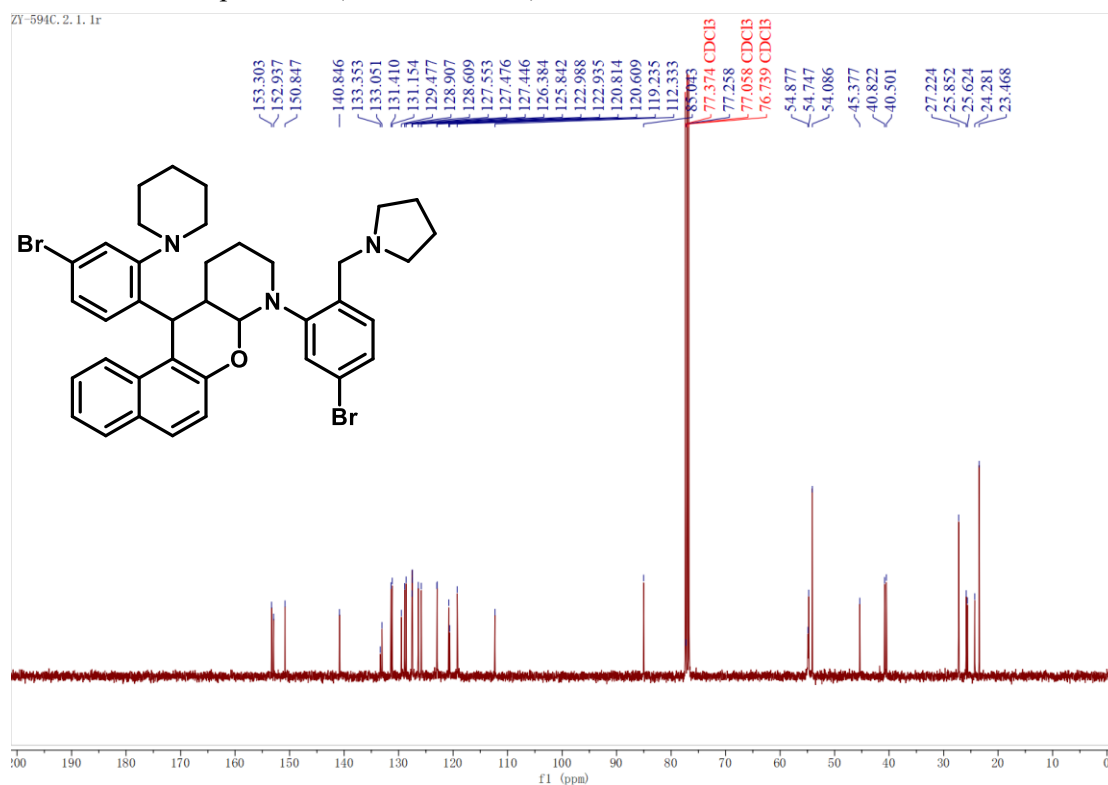

### <sup>1</sup>H NMR of Compound 4s (400 MHz, CDCl<sub>3</sub>)

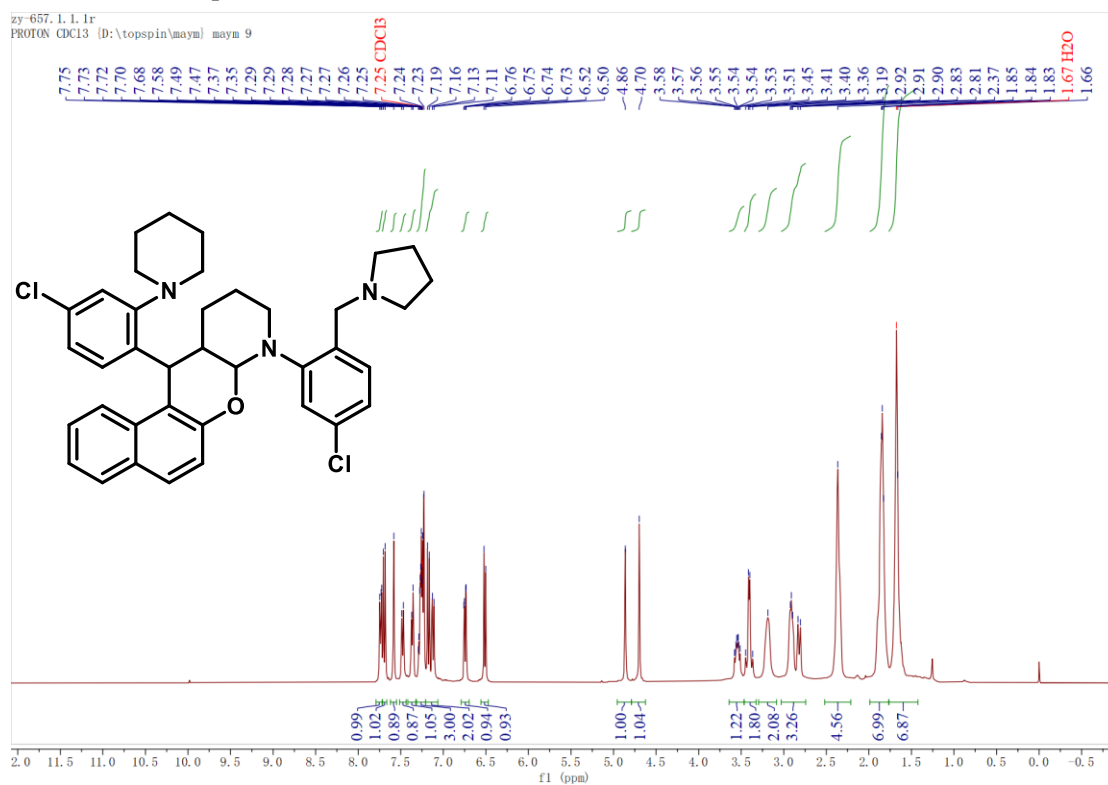

### <sup>13</sup>C NMR of Compound 4s (101 MHz, CDCl<sub>3</sub>)

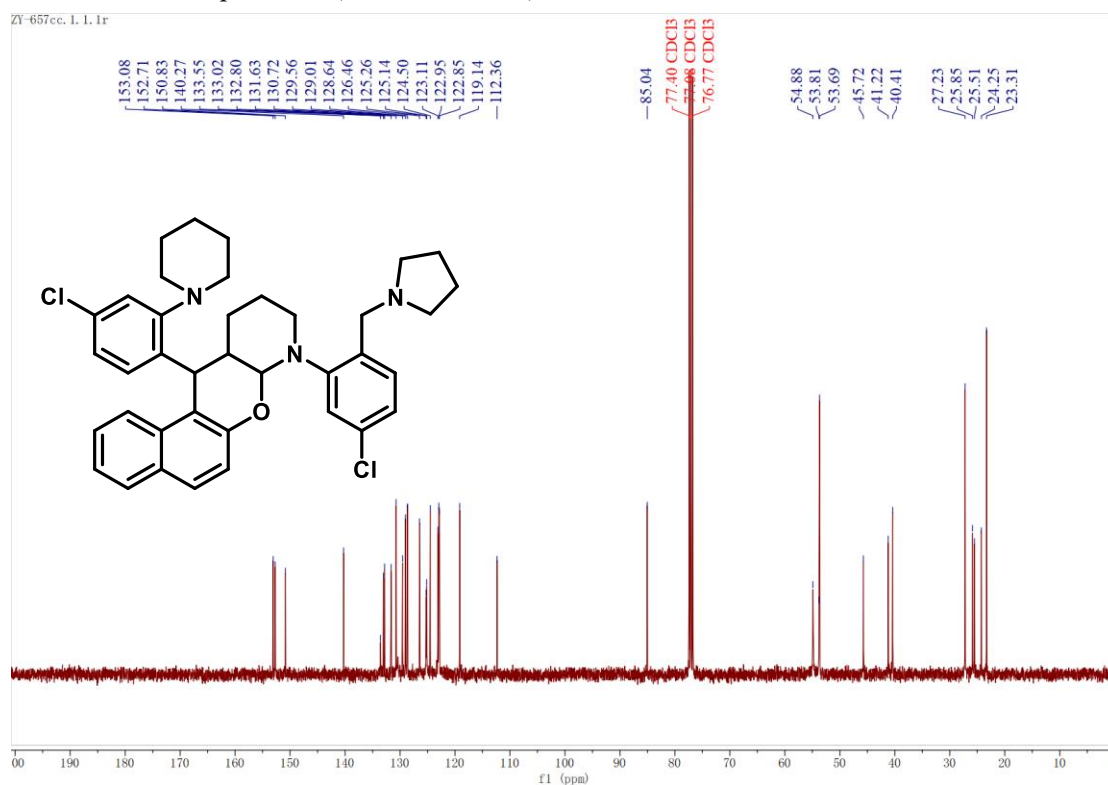

### $^1\text{H}$ NMR of Compound **4t** (400 MHz, $\text{CDCl}_3$ )

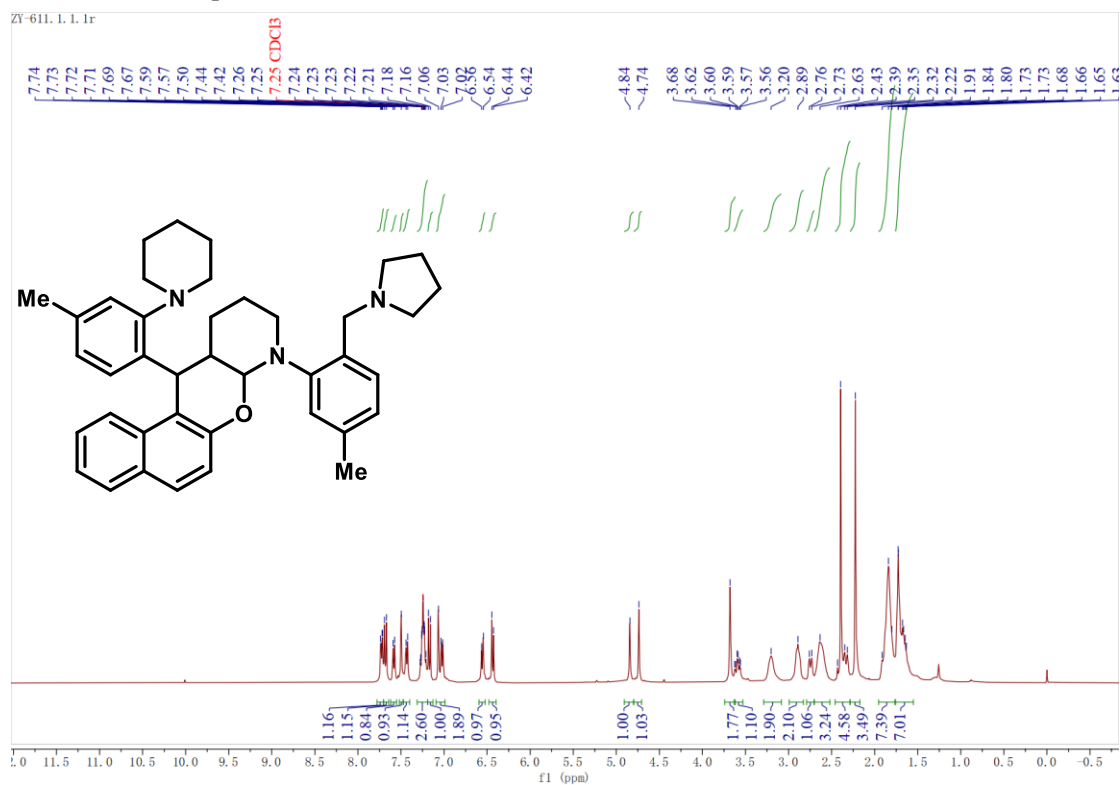

### $^{13}\text{C}$ NMR of Compound **4t** (101 MHz, $\text{CDCl}_3$ )

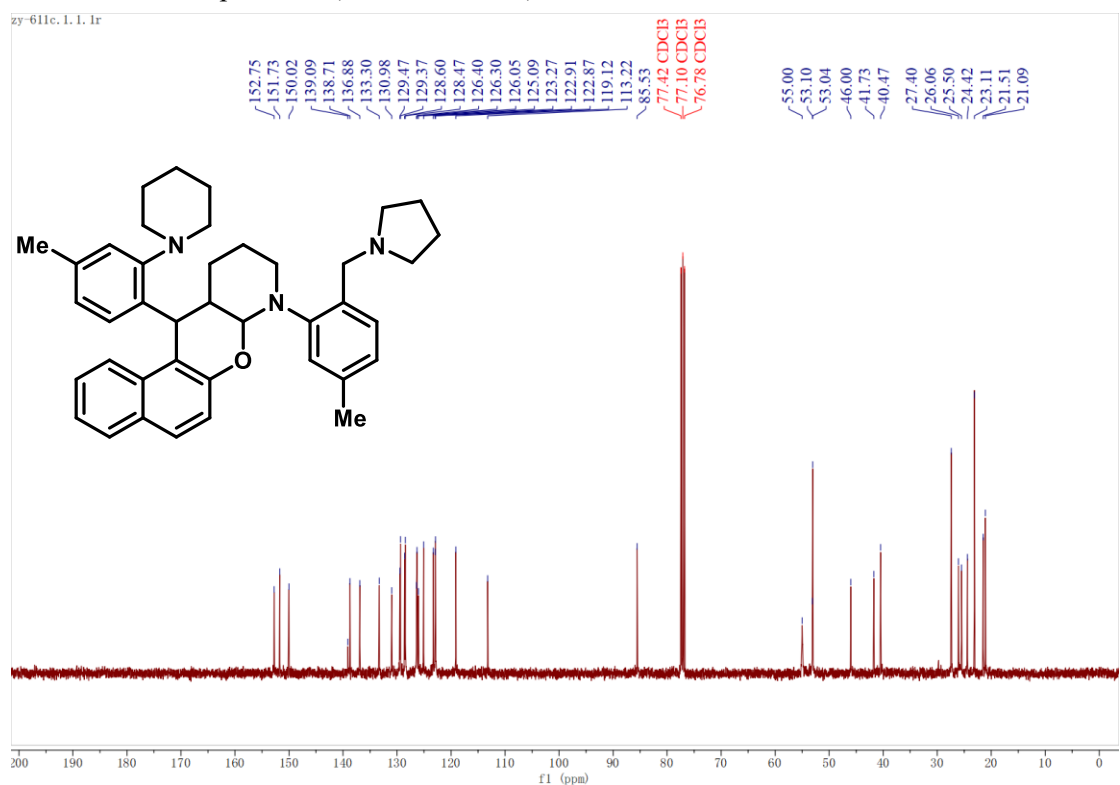

### <sup>1</sup>H NMR of Compound **4u** (400 MHz, CDCl<sub>3</sub>)

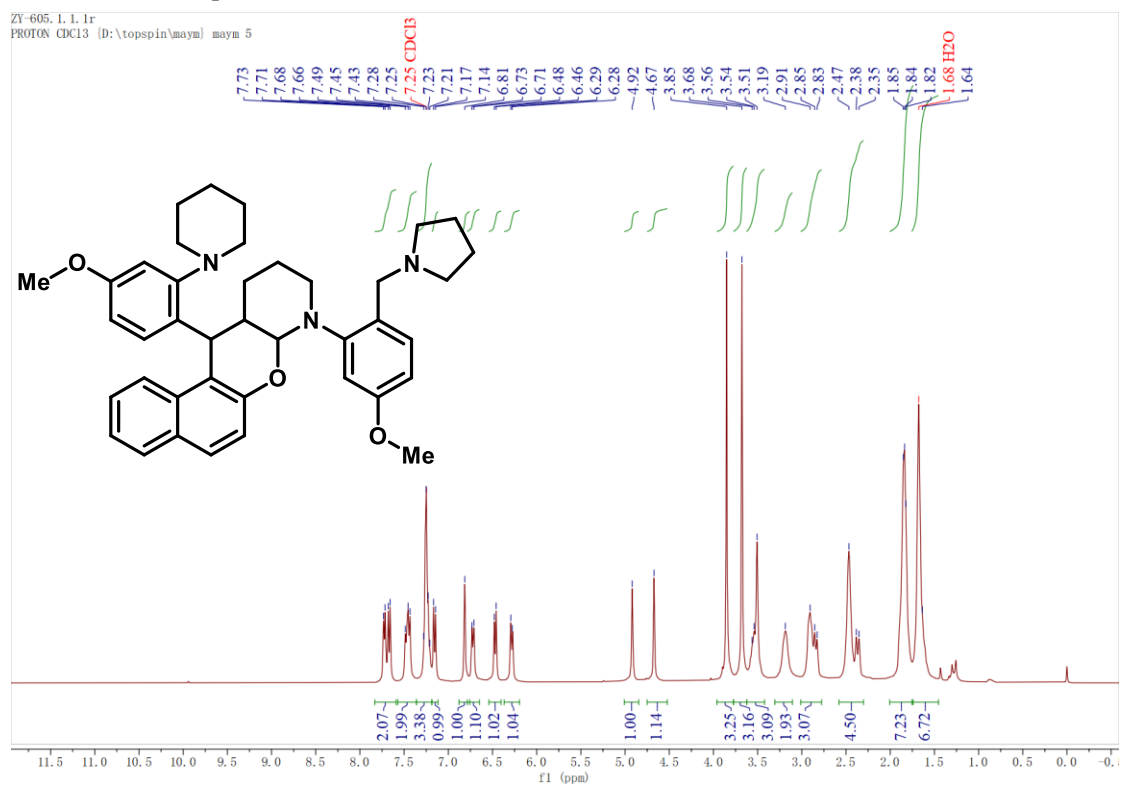

### <sup>13</sup>C NMR of Compound **4u** (101 MHz, CDCl<sub>3</sub>)

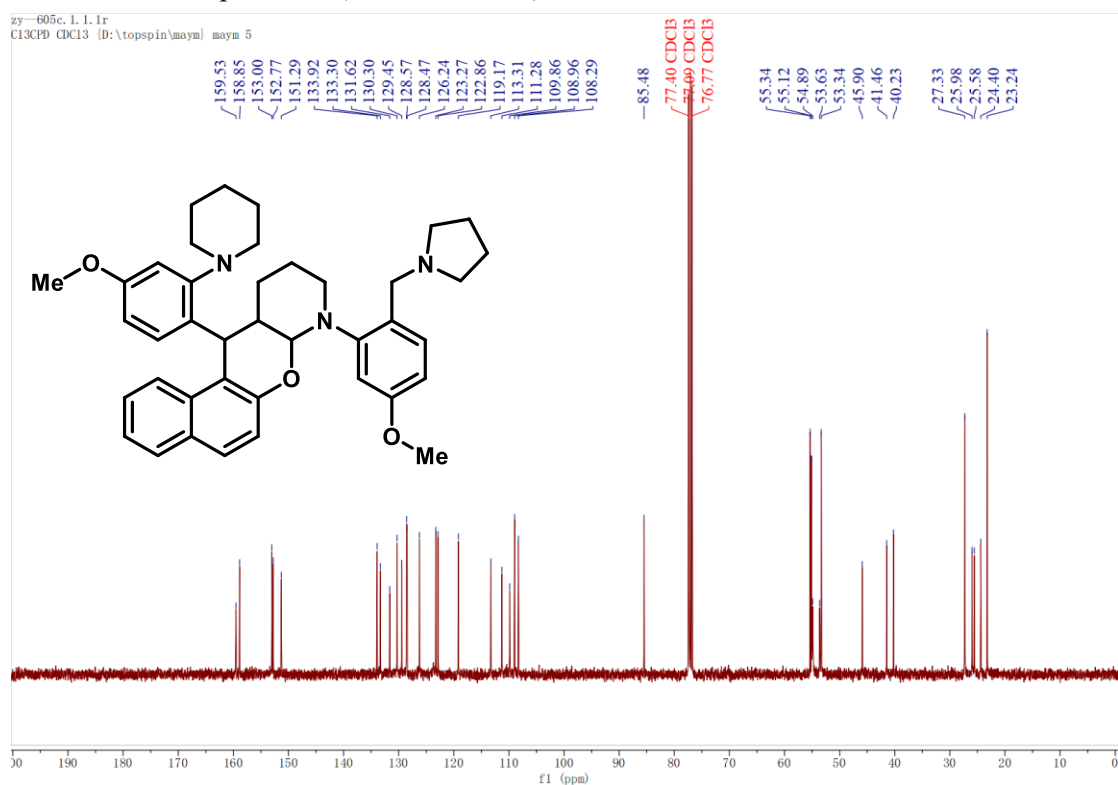

### $^1\text{H}$ NMR of Compound **4v** (400 MHz, $\text{CDCl}_3$ )

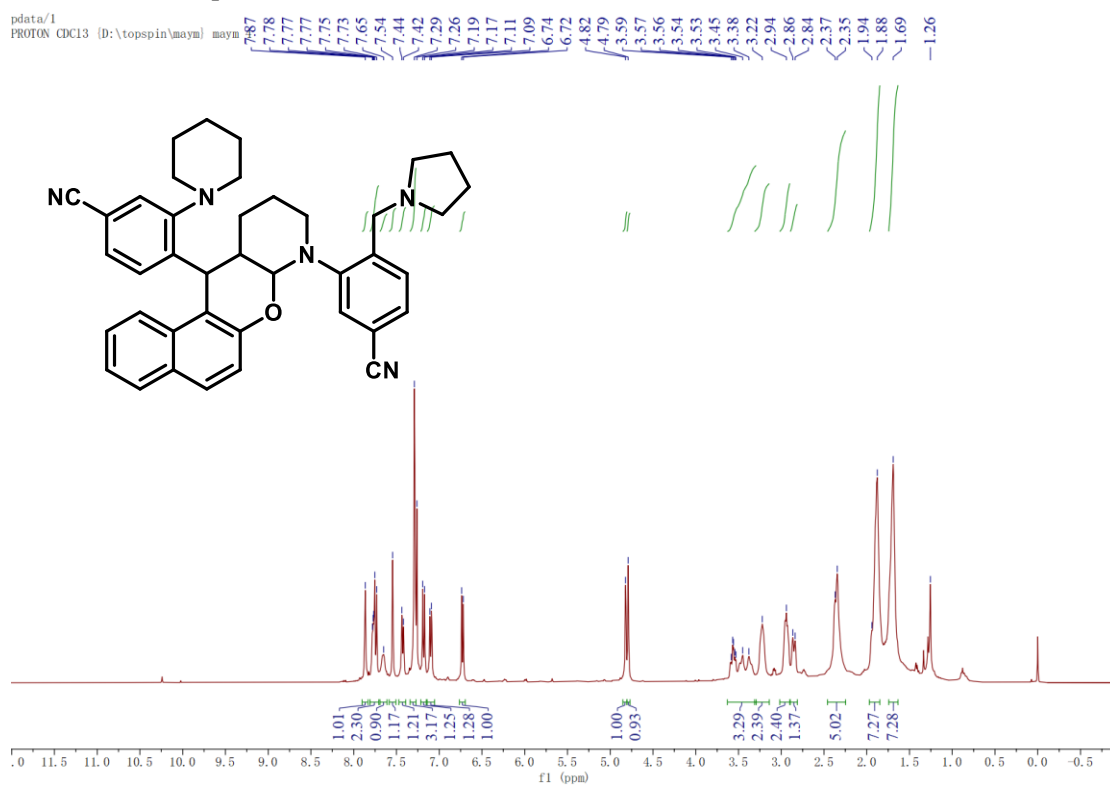

### $^{13}\text{C}$ NMR of Compound **4v** (101 MHz, $\text{CDCl}_3$ )

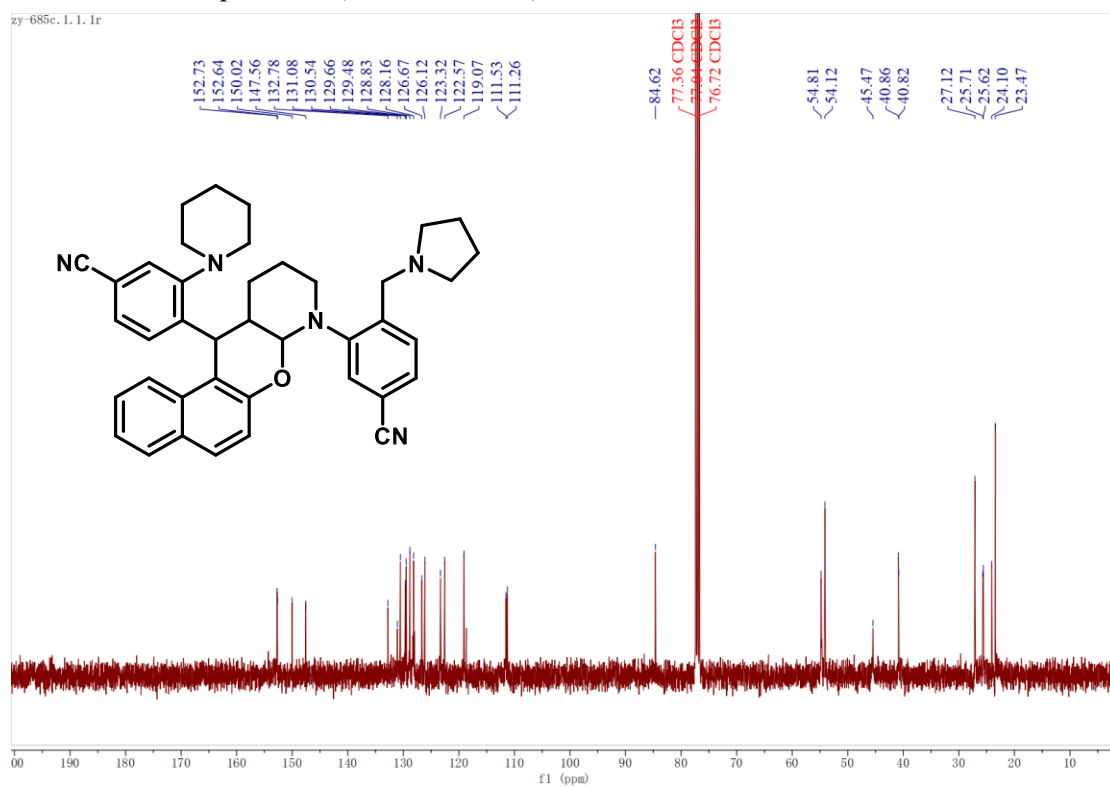

### $^1\text{H}$ NMR of Compound **4w** (400 MHz, $\text{CDCl}_3$ )

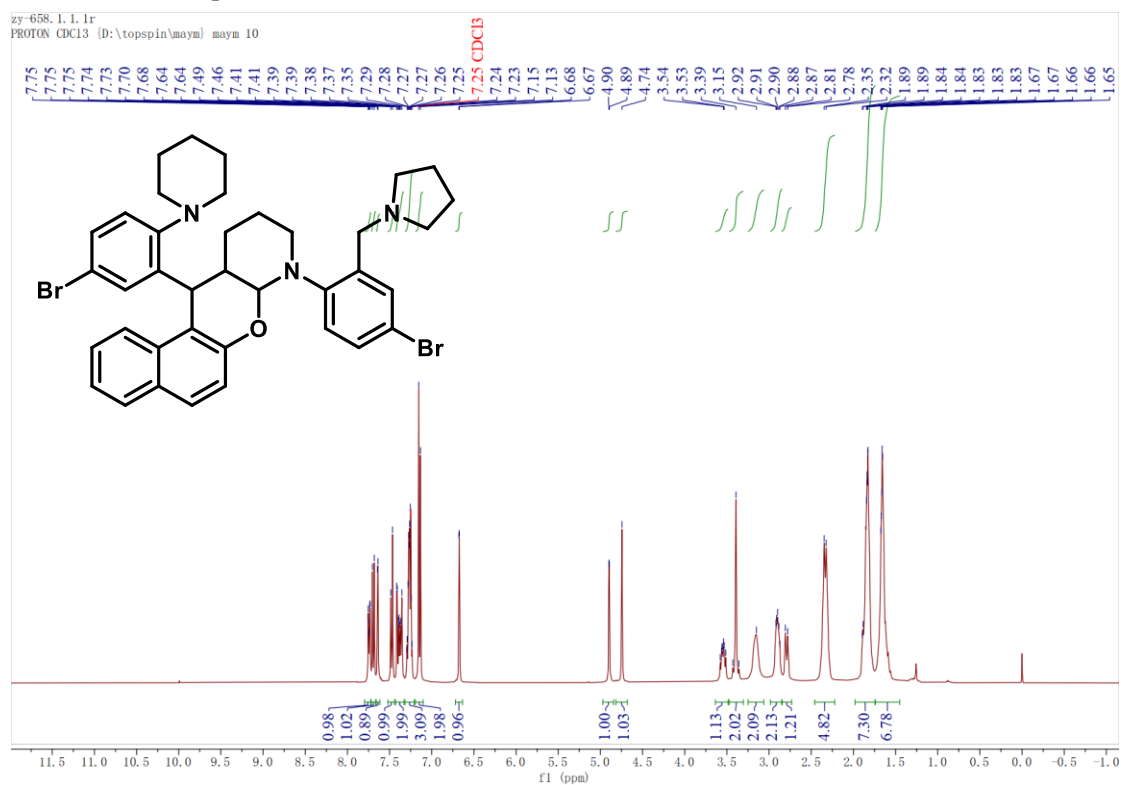

### $^{13}\text{C}$ NMR of Compound **4w** (101 MHz, $\text{CDCl}_3$ )

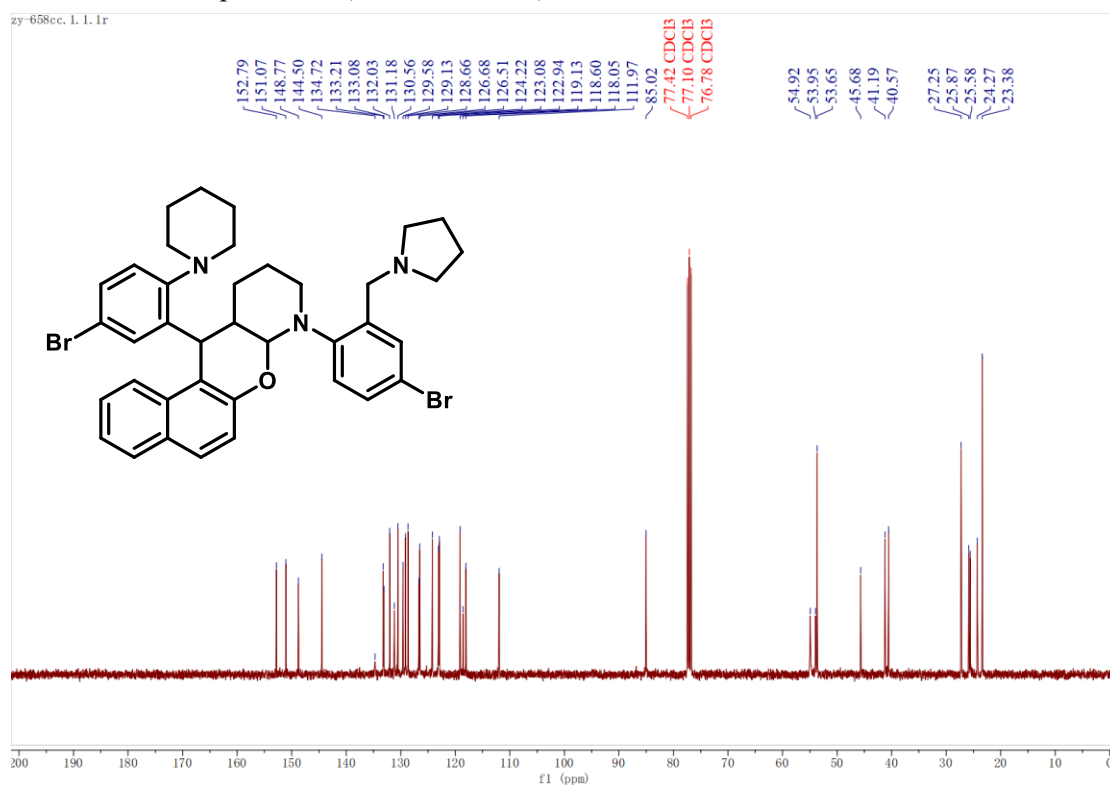

### $^1\text{H}$ NMR of Compound **4x** (400 MHz, $\text{CDCl}_3$ )

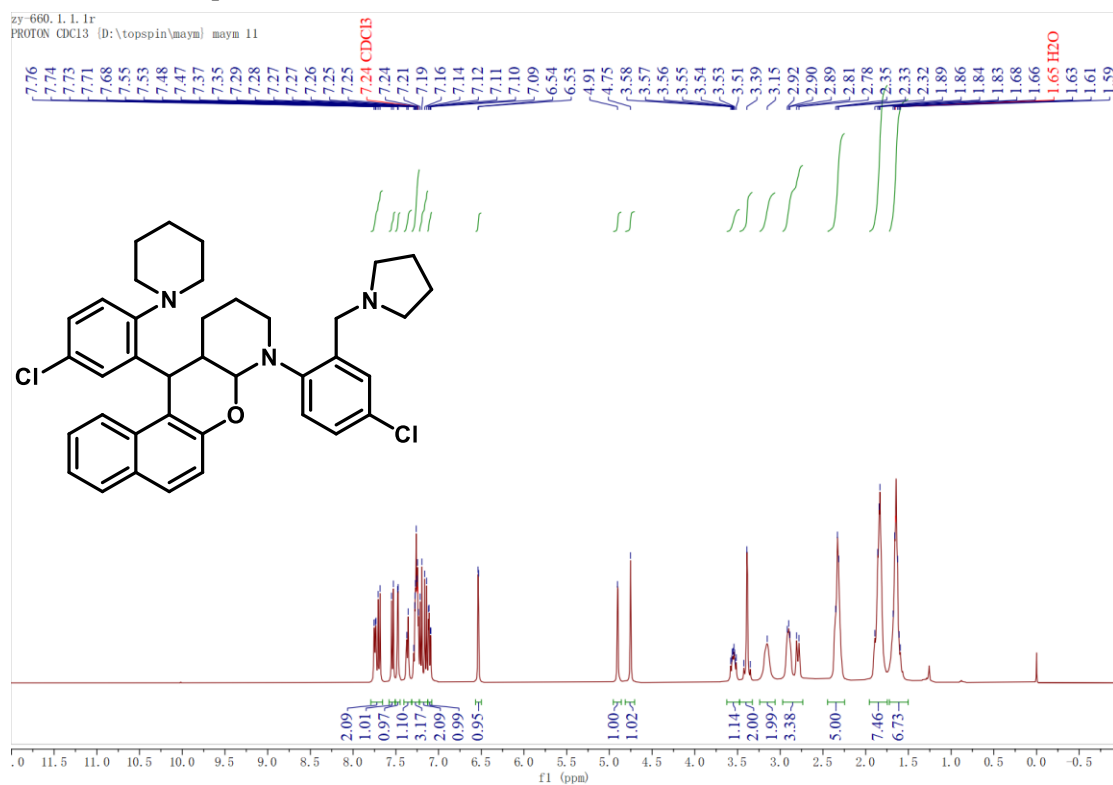

### $^{13}\text{C}$ NMR of Compound **4x** (101 MHz, $\text{CDCl}_3$ )

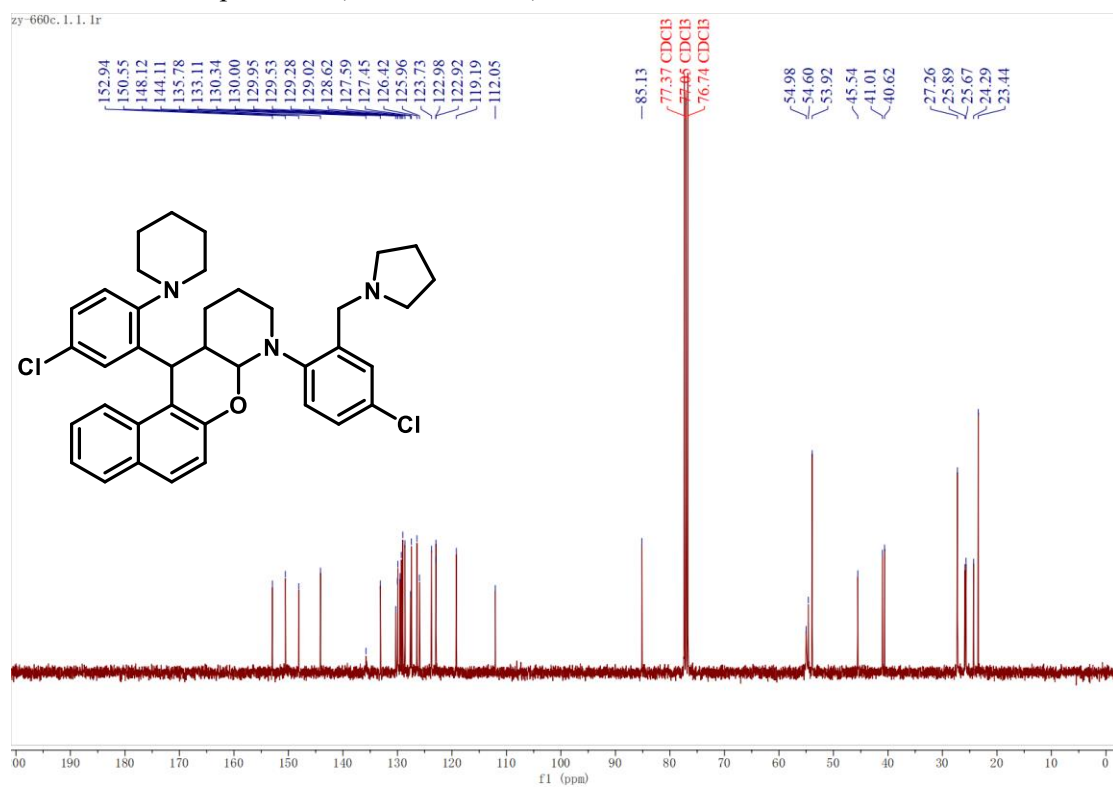



### $^1\text{H}$ NMR of Compound **4y** (400 MHz, $\text{CDCl}_3$ )

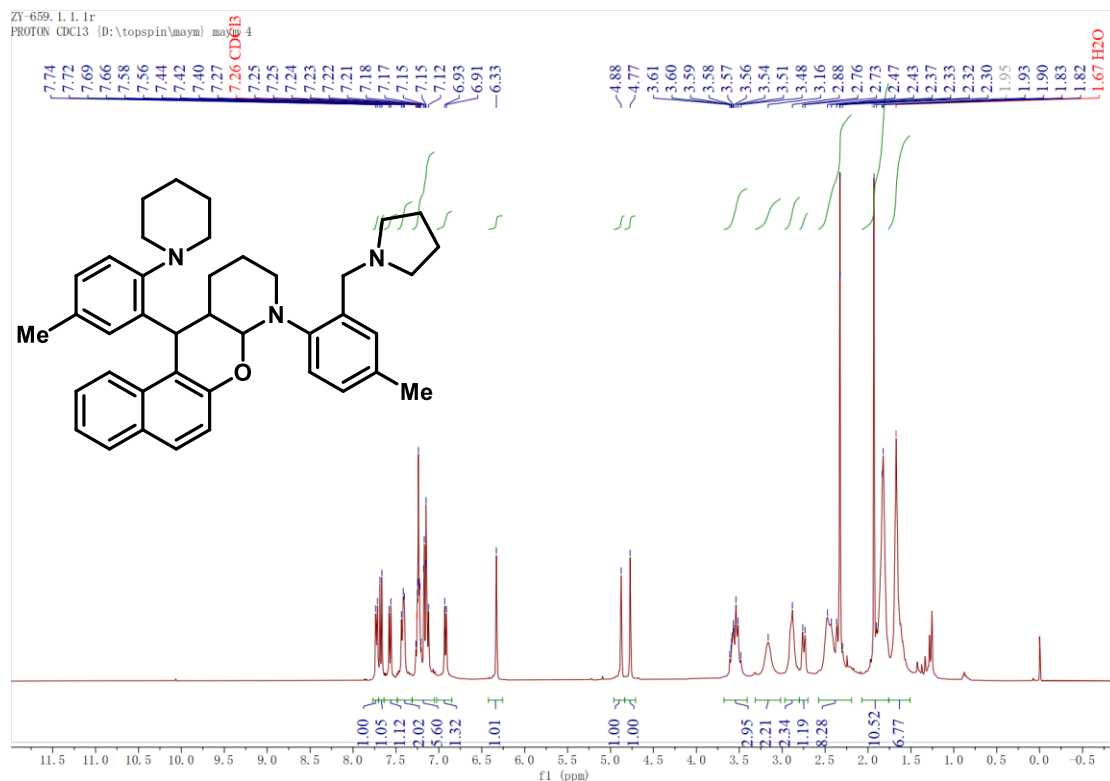

### $^{13}\text{C}$ NMR of Compound **4y** (101 MHz, $\text{CDCl}_3$ )

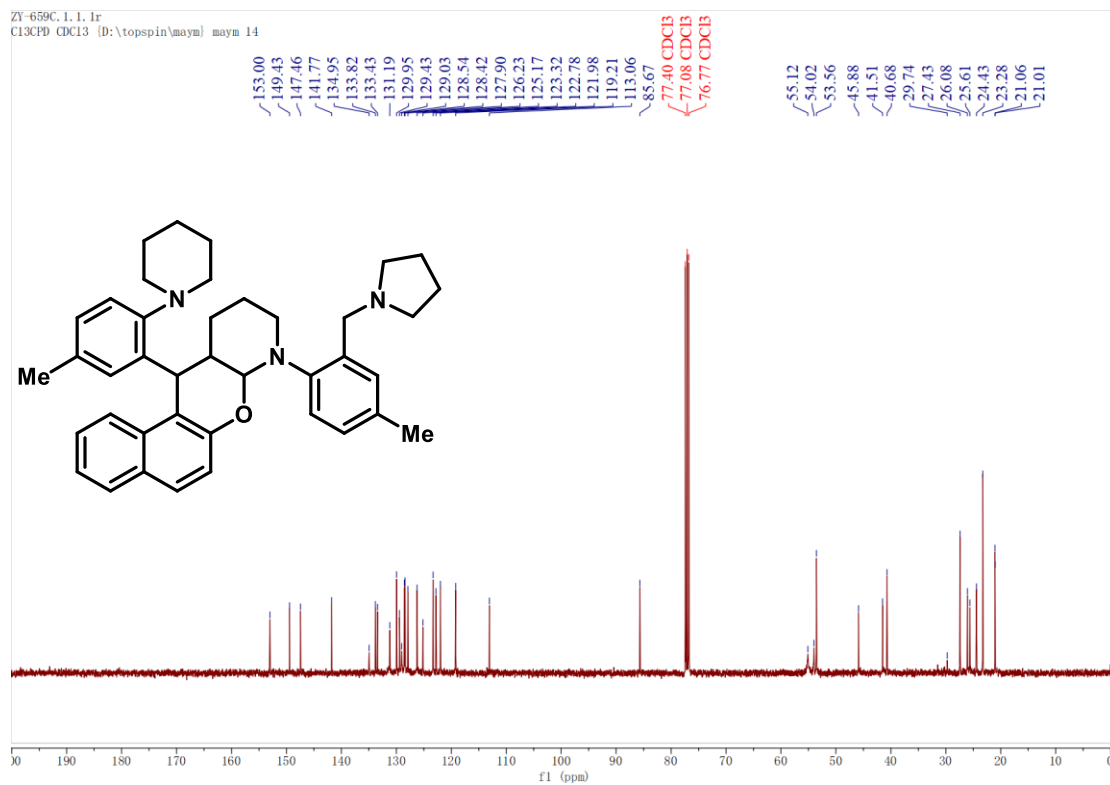

<sup>1</sup>H NMR of Compound **4z** (400 MHz, CDCl<sub>3</sub>)

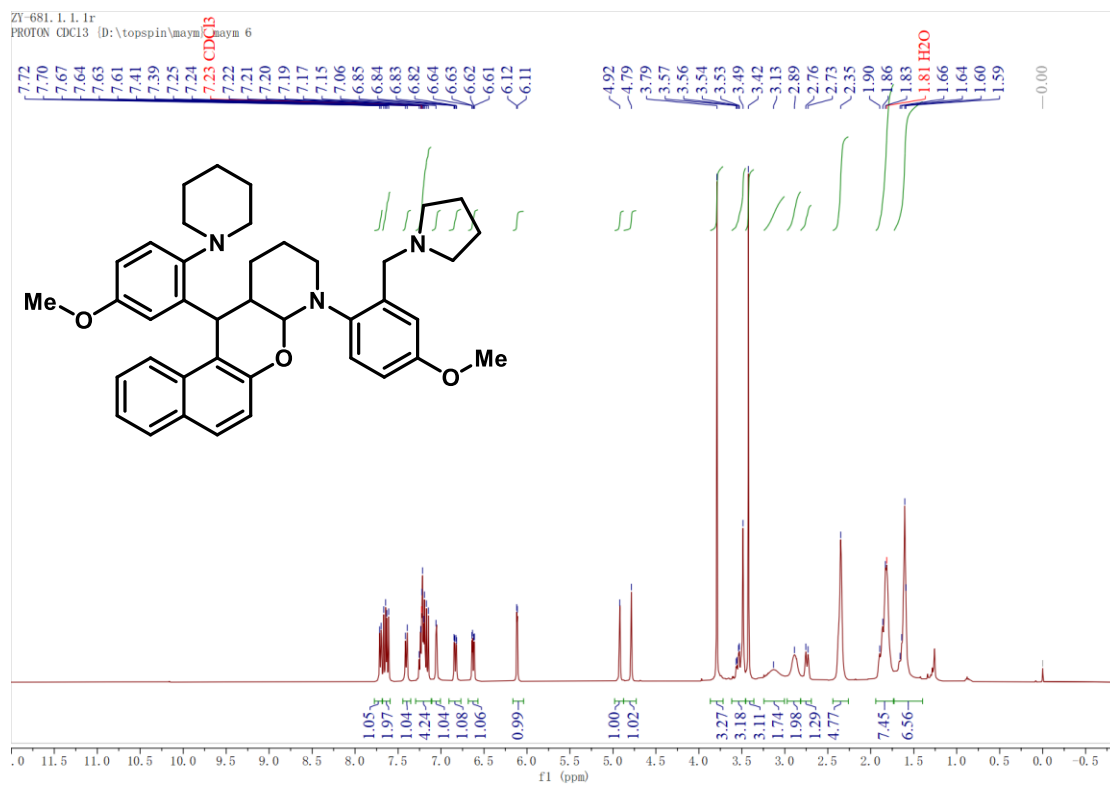

<sup>13</sup>C NMR of Compound **4z** (101 MHz, CDCl<sub>3</sub>)

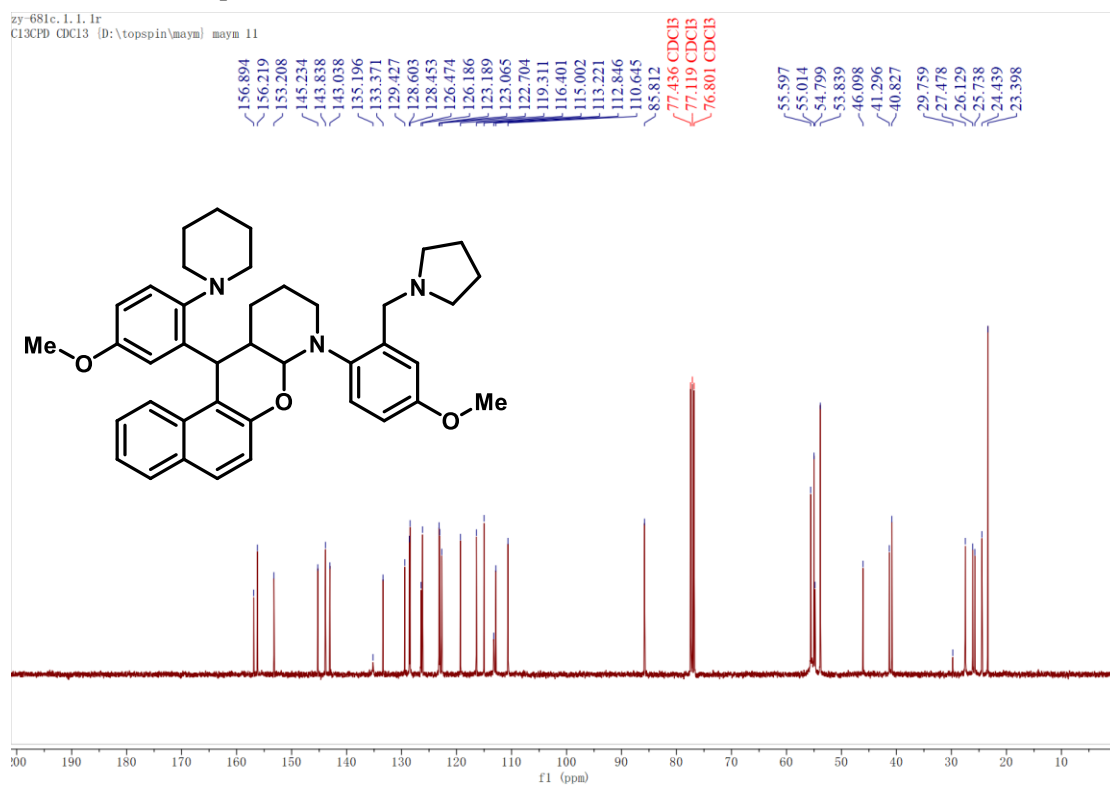

### <sup>1</sup>H NMR of Compound **4aa** (400 MHz, CDCl<sub>3</sub>)

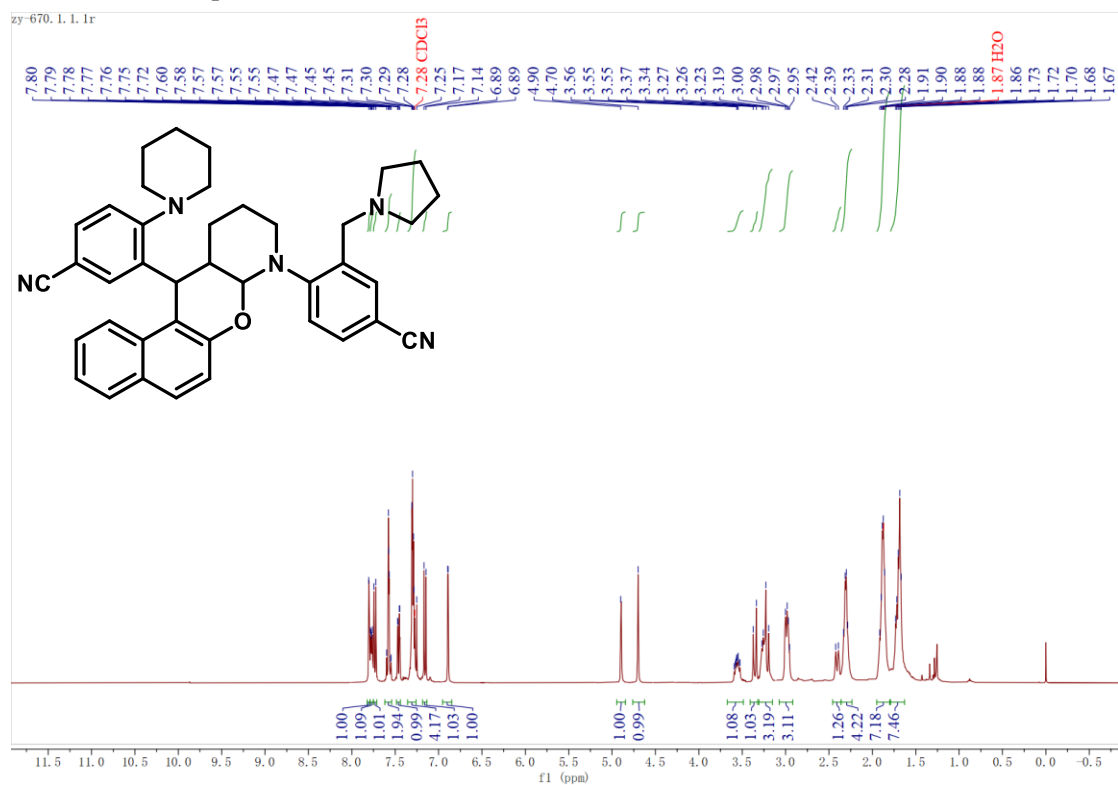

### <sup>13</sup>C NMR of Compound **4aa** (101 MHz, CDCl<sub>3</sub>)

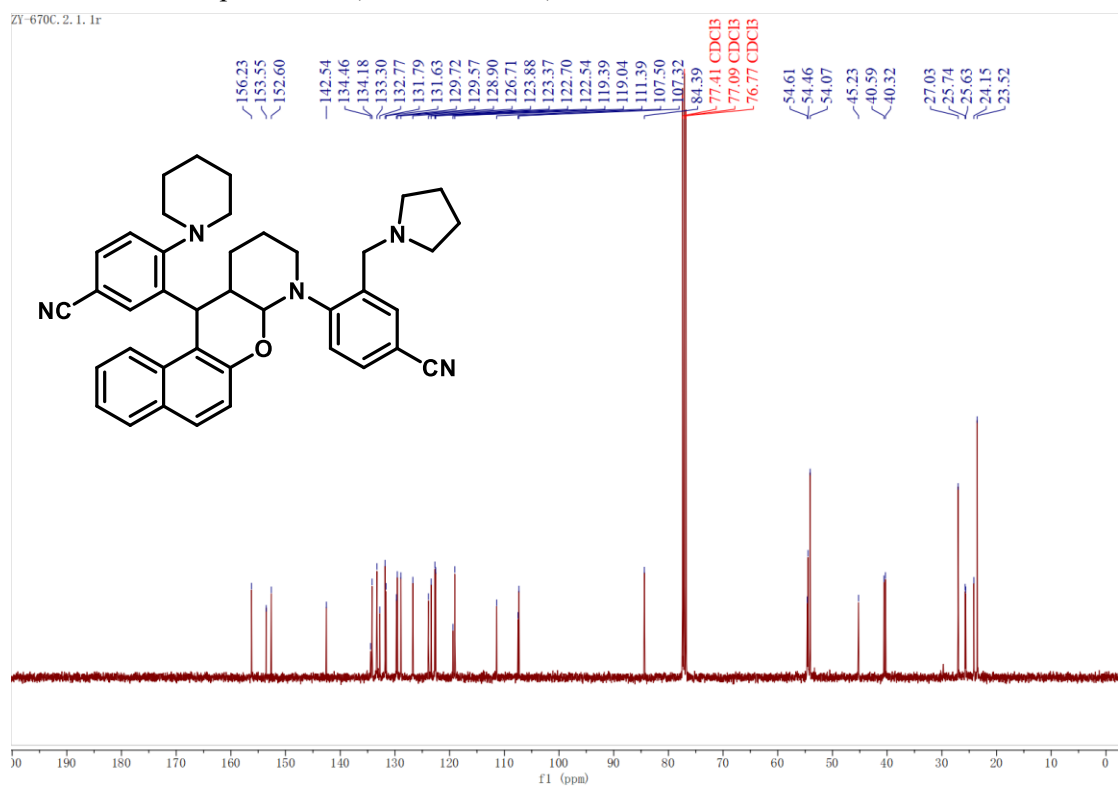

### <sup>1</sup>H NMR of Compound **4ab** (400 MHz, CDCl<sub>3</sub>)

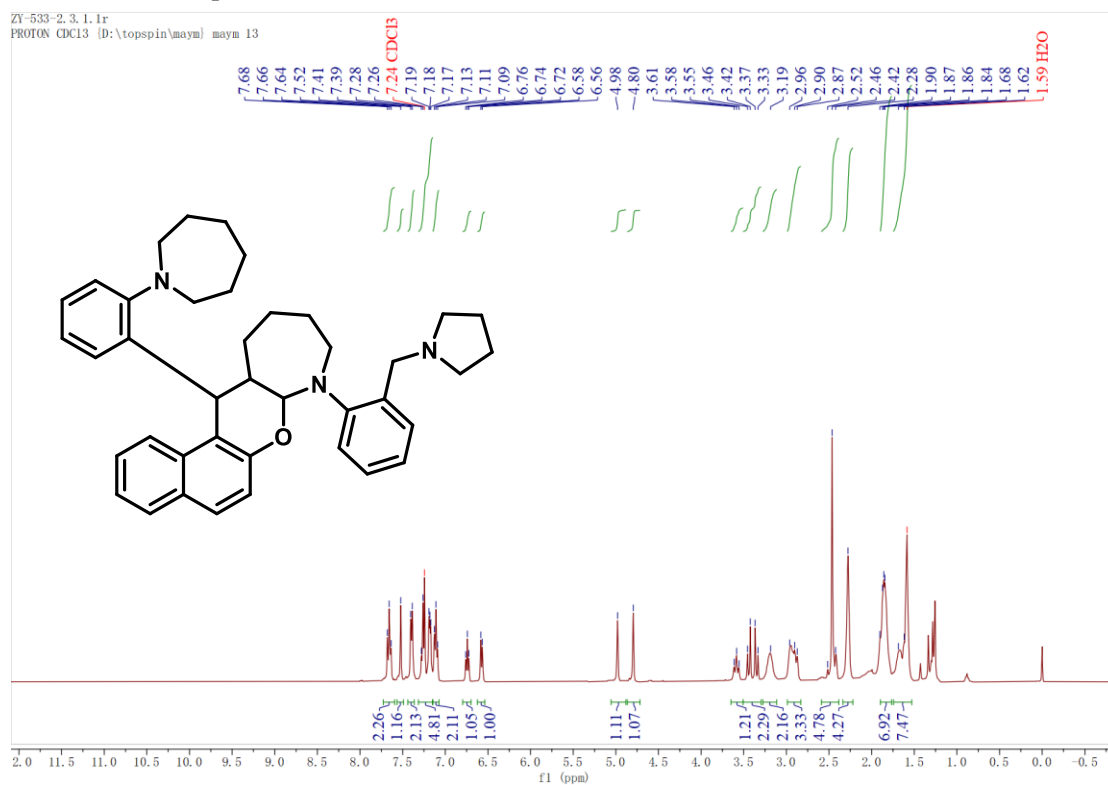

### <sup>13</sup>C NMR of Compound **4ab** (101 MHz, CDCl<sub>3</sub>)

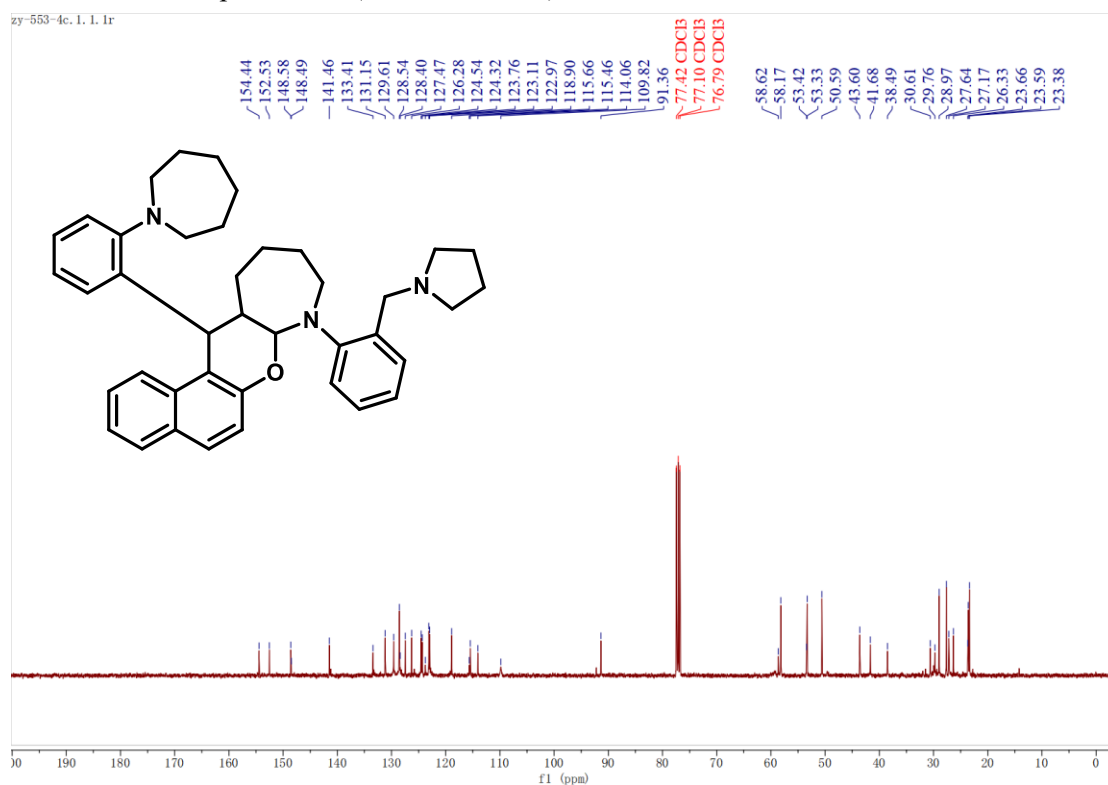

### <sup>1</sup>H NMR of Compound **4ac** (400 MHz, CDCl<sub>3</sub>)

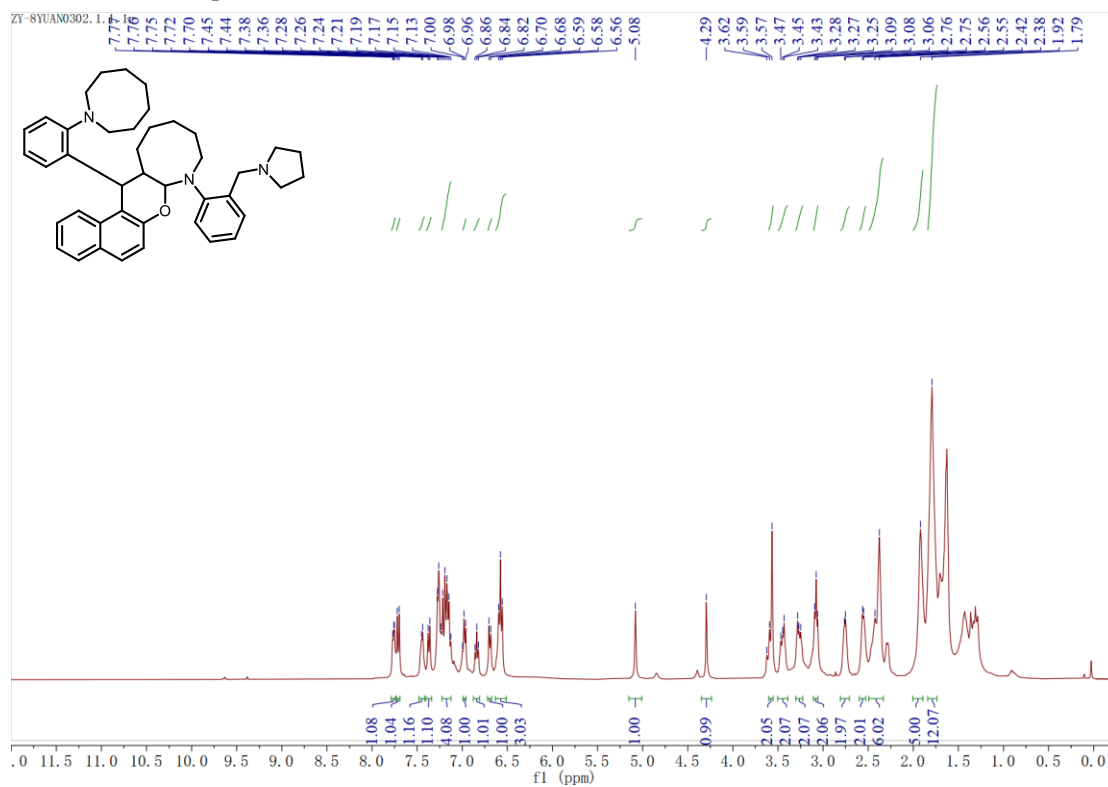

### <sup>13</sup>C NMR of Compound **4ac** (101 MHz, CDCl<sub>3</sub>)

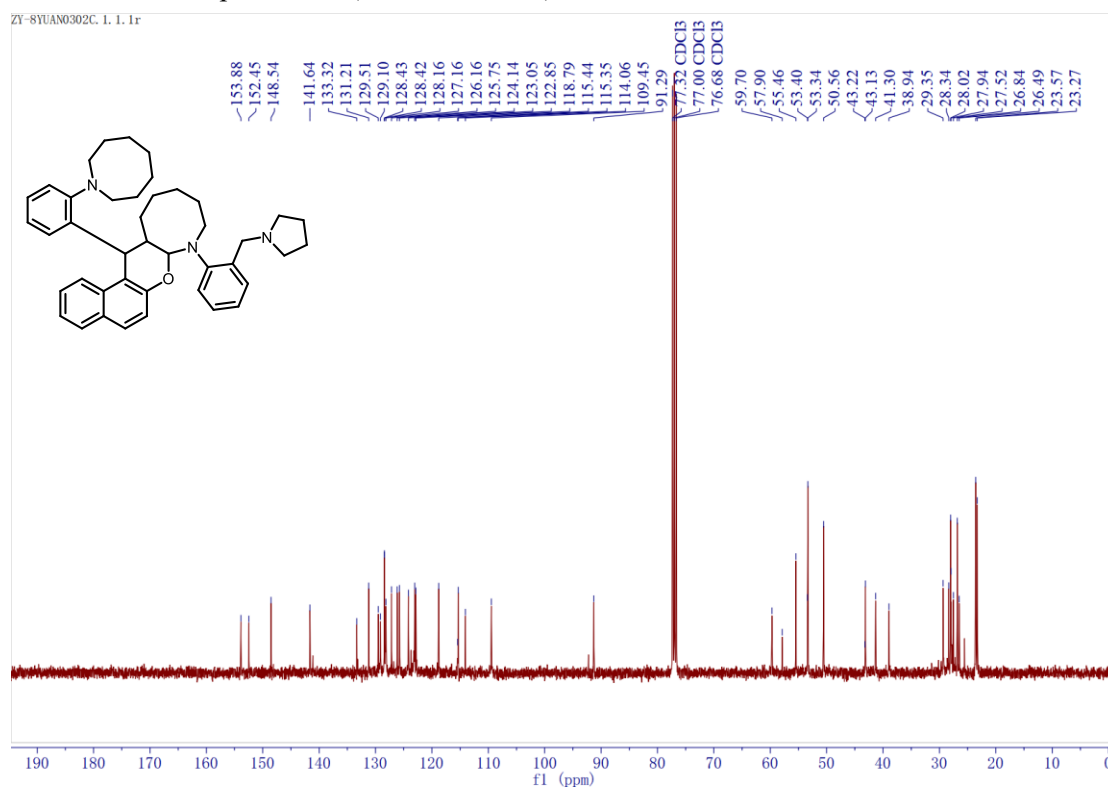

### <sup>1</sup>H NMR of Compound **4ad** (400 MHz, CDCl<sub>3</sub>)

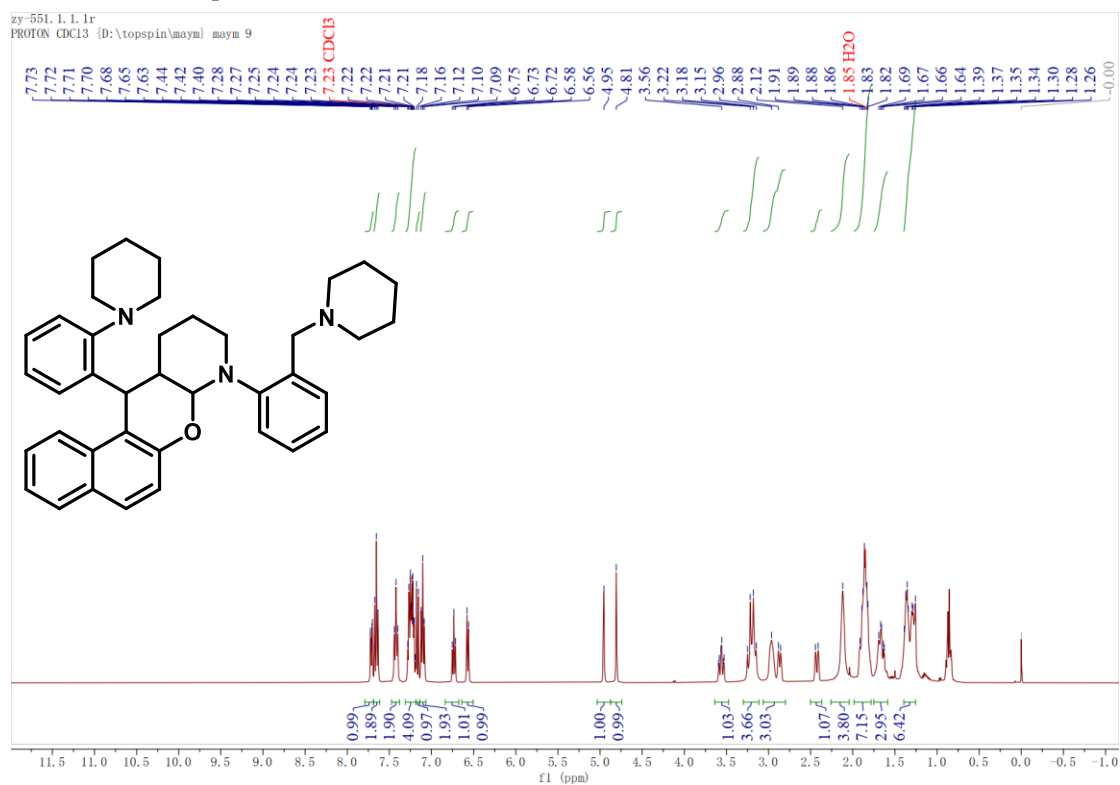

### <sup>13</sup>C NMR of Compound **4ad** (101 MHz, CDCl<sub>3</sub>)

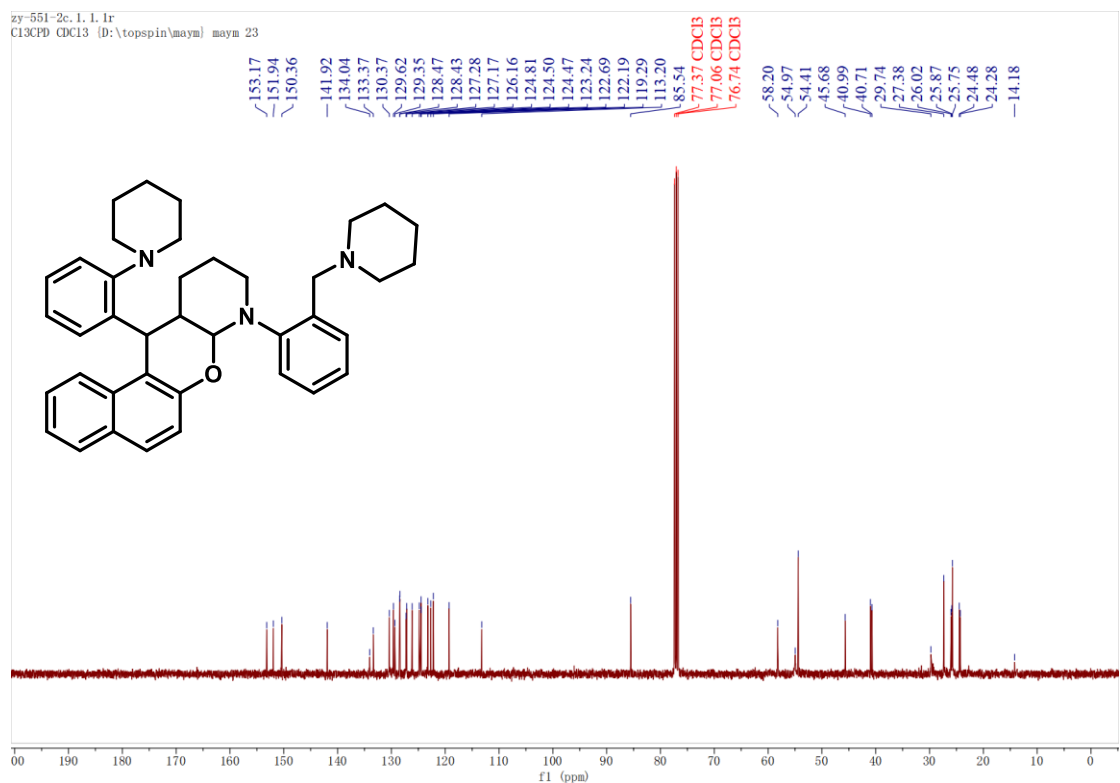

### <sup>1</sup>H NMR of Compound **4ae** (400 MHz, CDCl<sub>3</sub>)

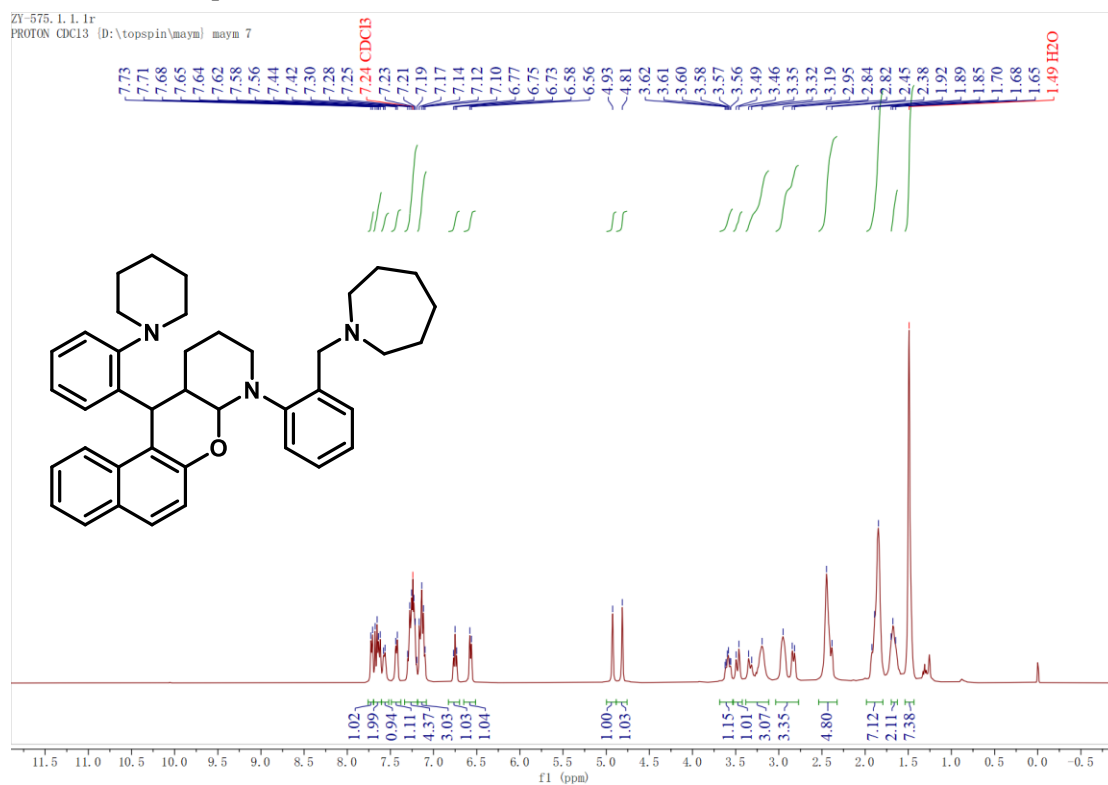

### <sup>13</sup>C NMR of Compound **4ae** (101 MHz, CDCl<sub>3</sub>)

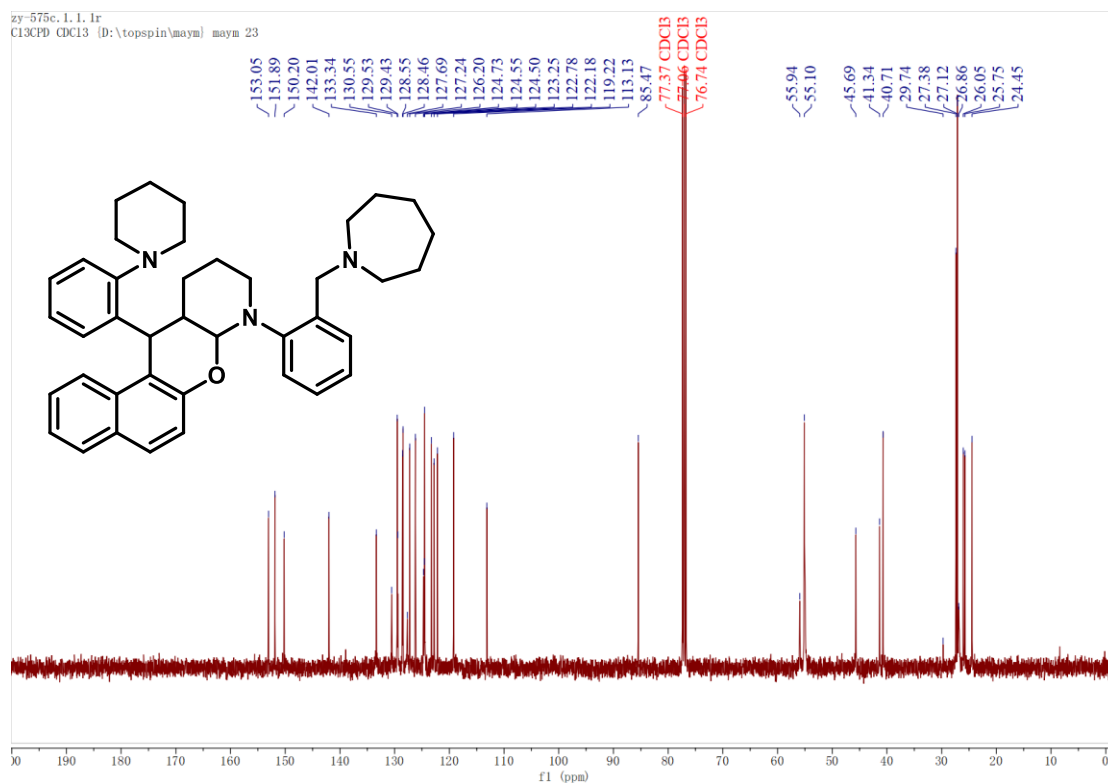

<sup>1</sup>H NMR of Compound **4af** (400 MHz, CDCl<sub>3</sub>)

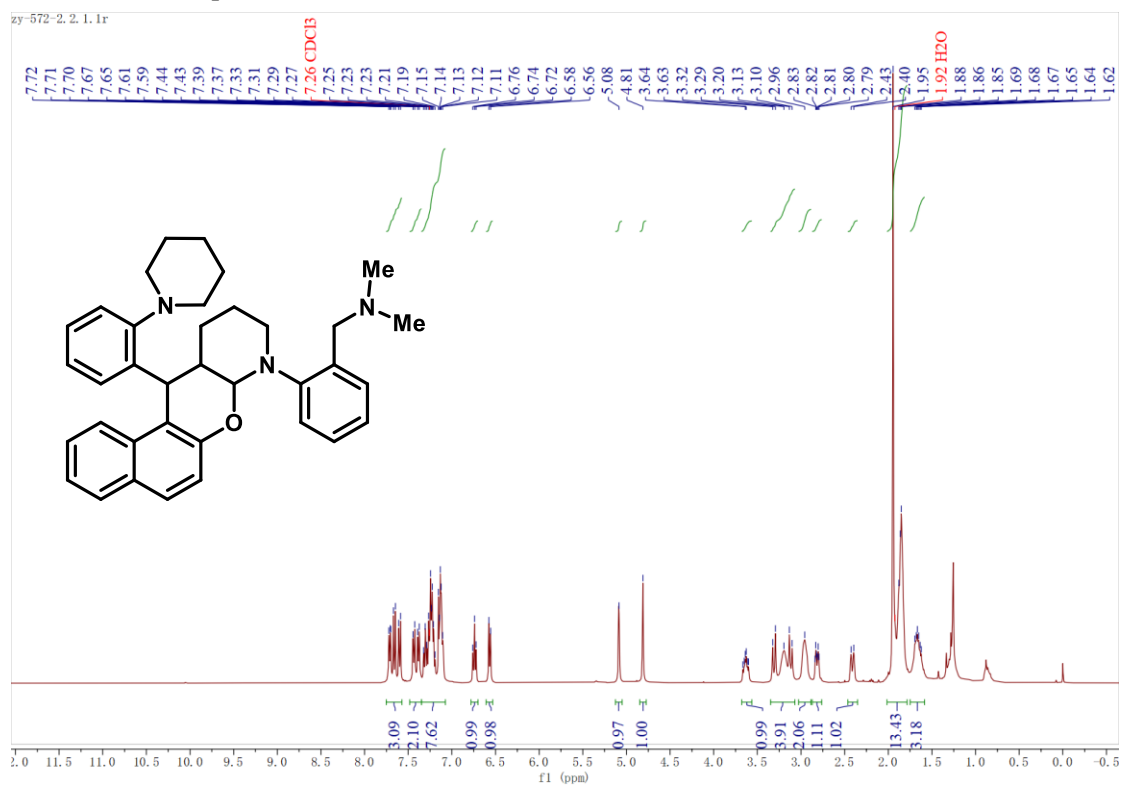

<sup>13</sup>C NMR of Compound **4af** (101 MHz, CDCl<sub>3</sub>)

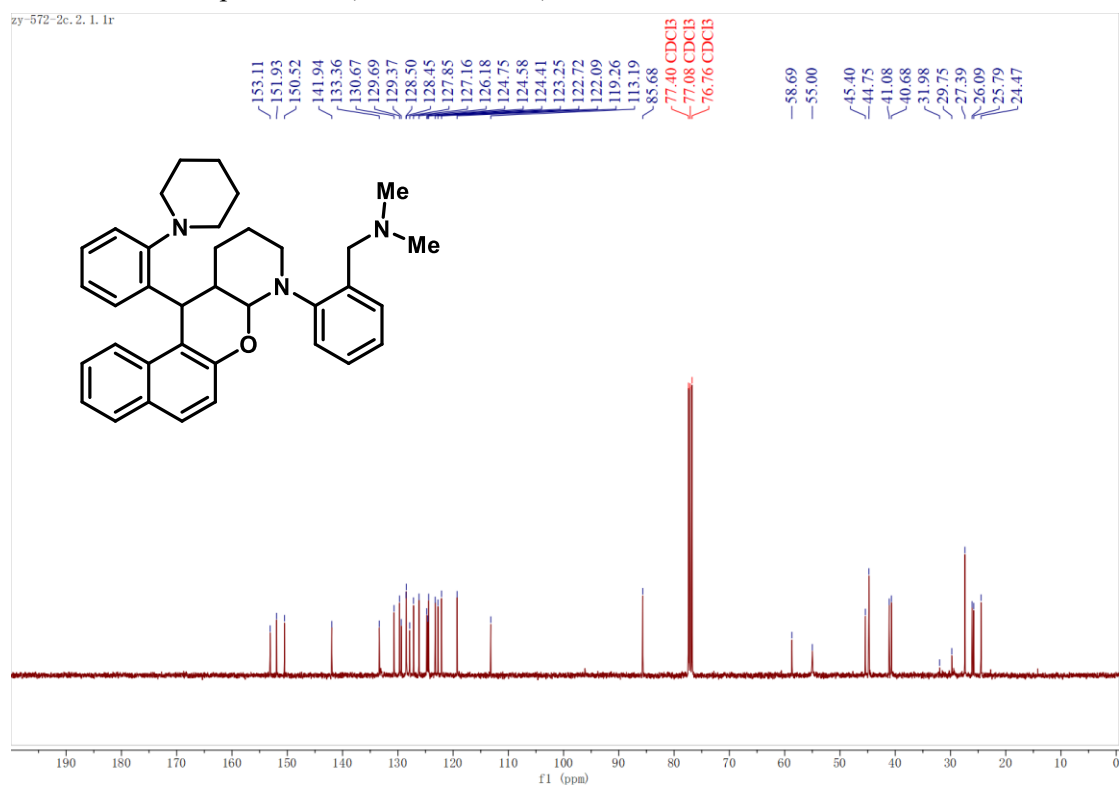



### <sup>1</sup>H NMR of Compound **4ag** (400 MHz, CDCl<sub>3</sub>)

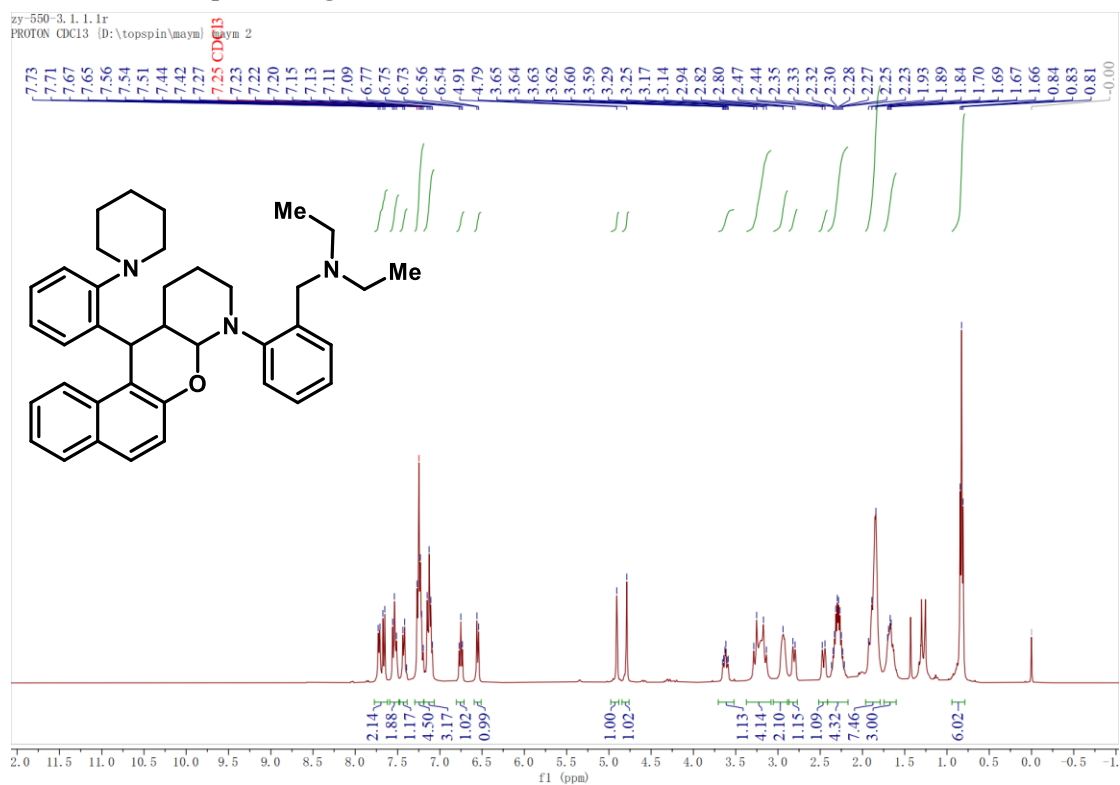

### <sup>13</sup>C NMR of Compound **4ag** (101 MHz, CDCl<sub>3</sub>)

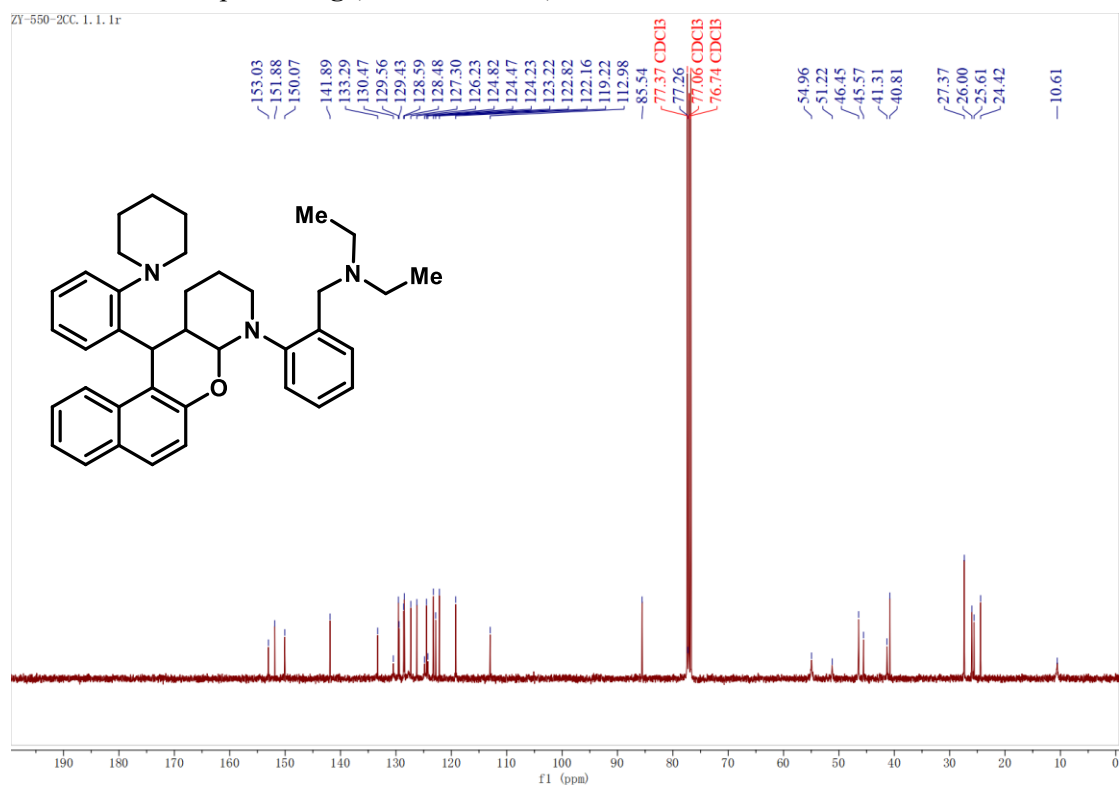

### <sup>1</sup>H NMR of Compound **4ah** (400 MHz, CDCl<sub>3</sub>)

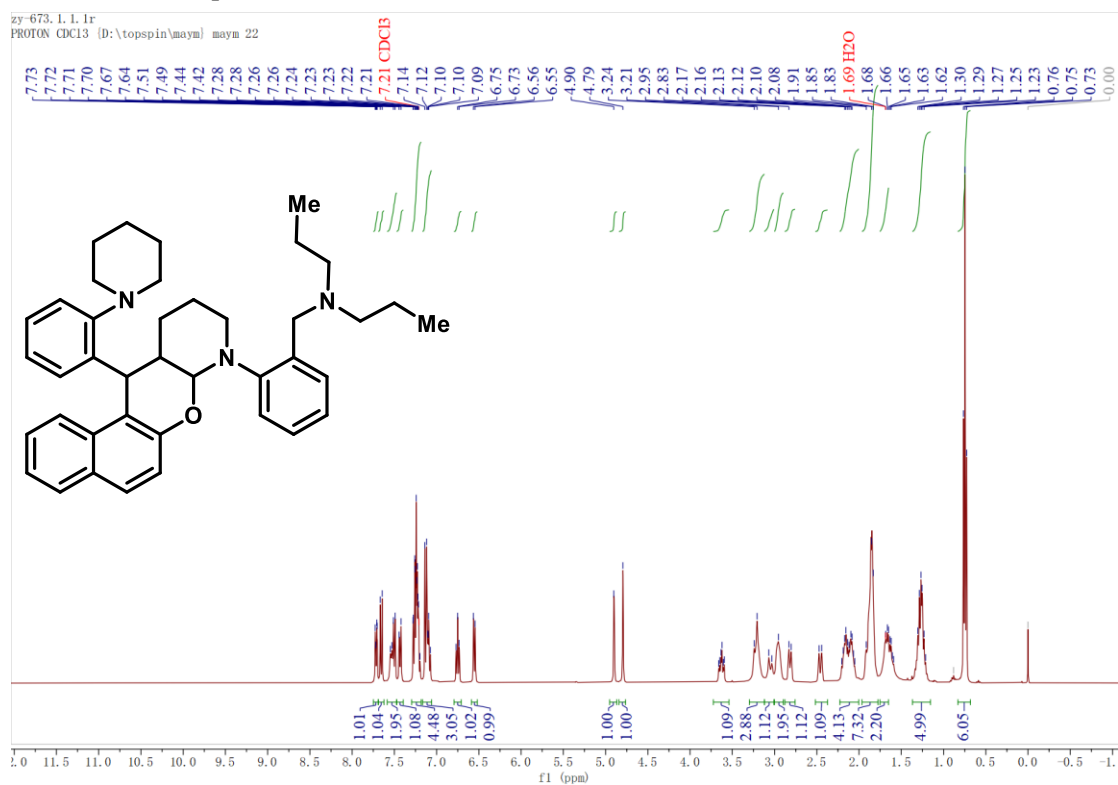

### <sup>13</sup>C NMR of Compound **4ah** (101 MHz, CDCl<sub>3</sub>)

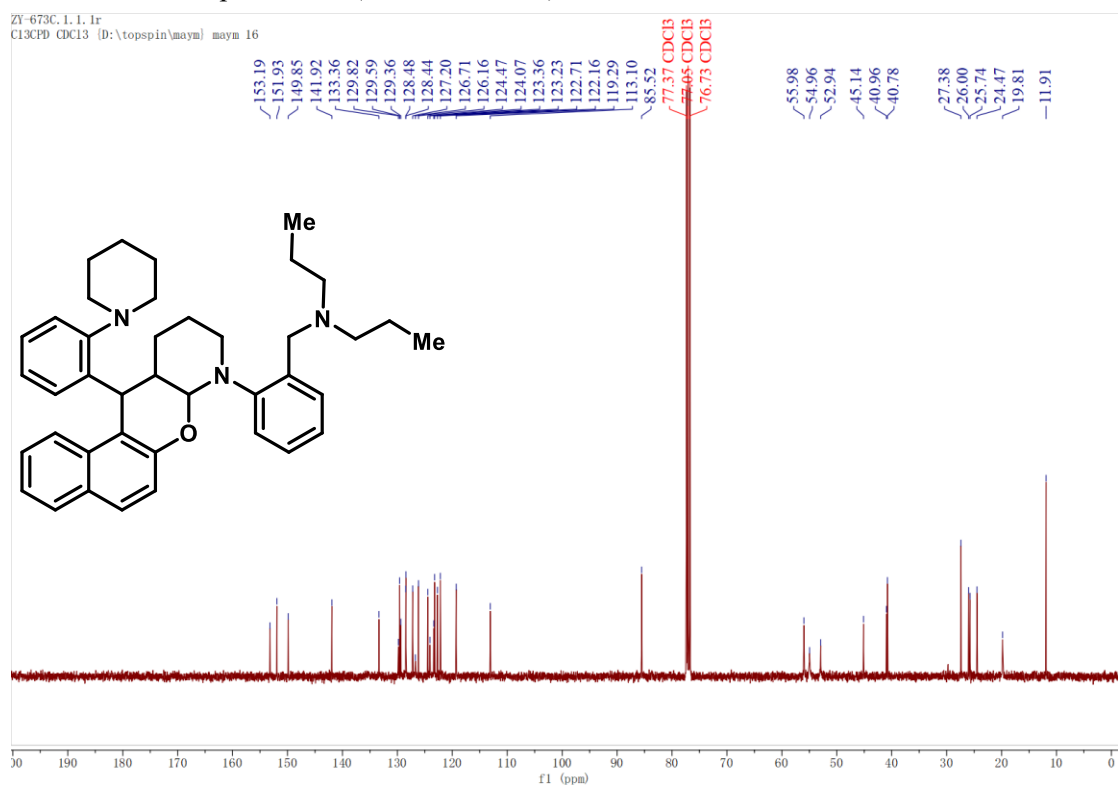

### <sup>1</sup>H NMR of Compound **4ai** (400 MHz, CDCl<sub>3</sub>)

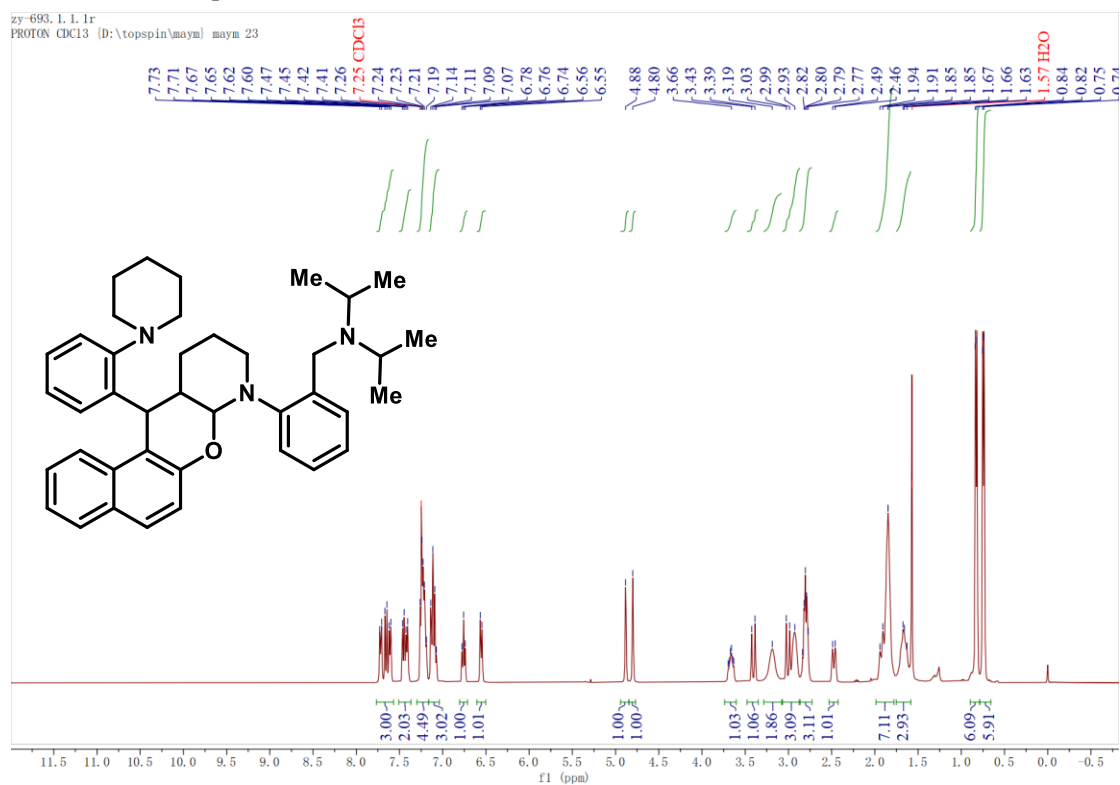

### <sup>13</sup>C NMR of Compound **4ai** (101 MHz, CDCl<sub>3</sub>)

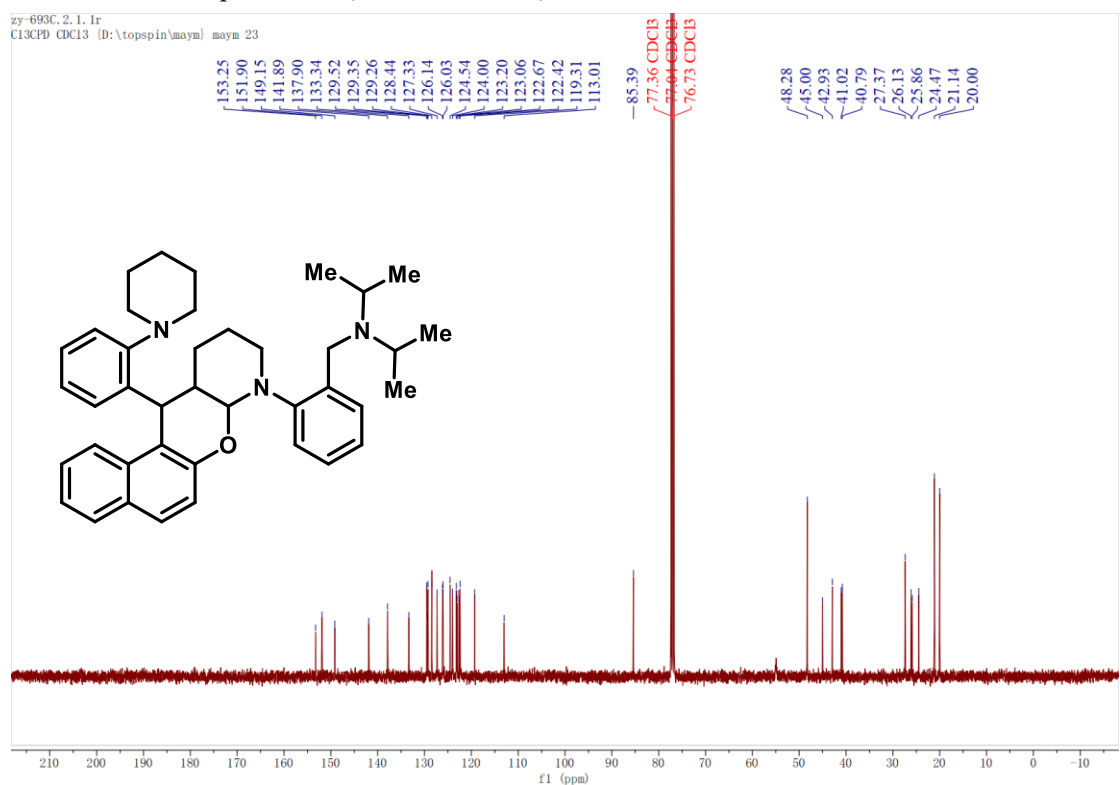

### <sup>1</sup>H NMR of Compound **4aj** (400 MHz, CDCl<sub>3</sub>)

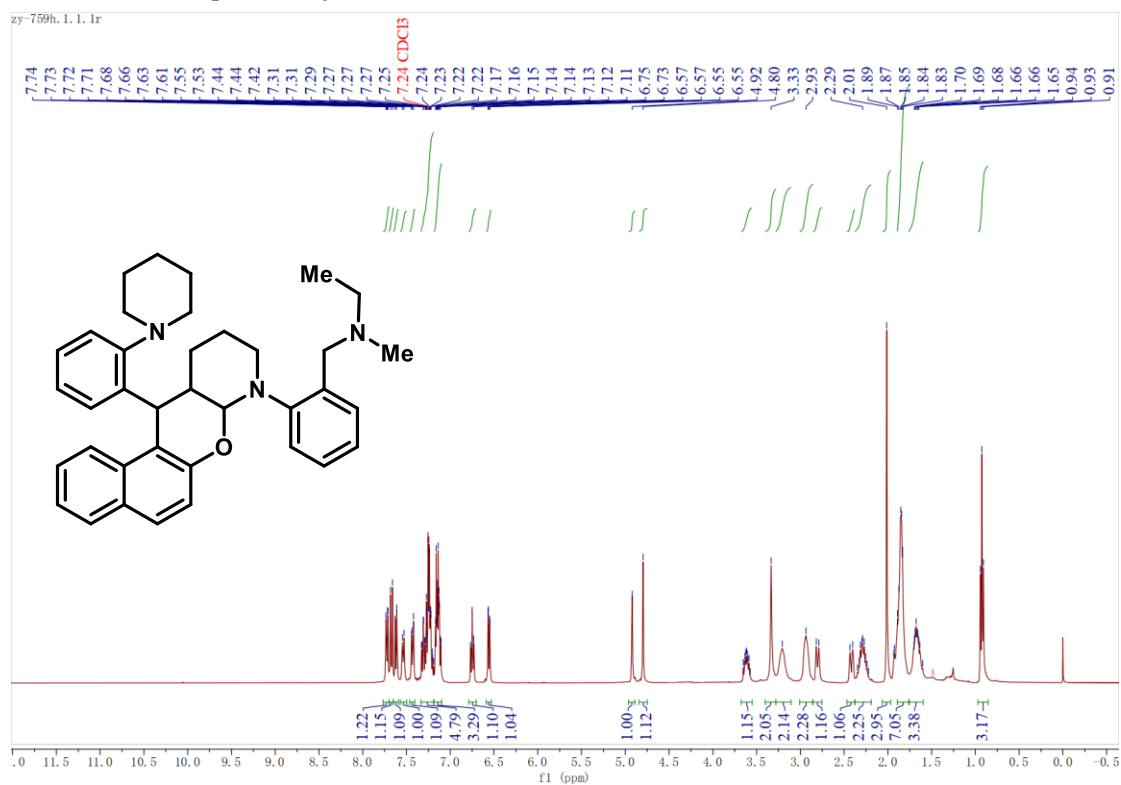

### <sup>13</sup>C NMR of Compound **4aj** (101 MHz, CDCl<sub>3</sub>)

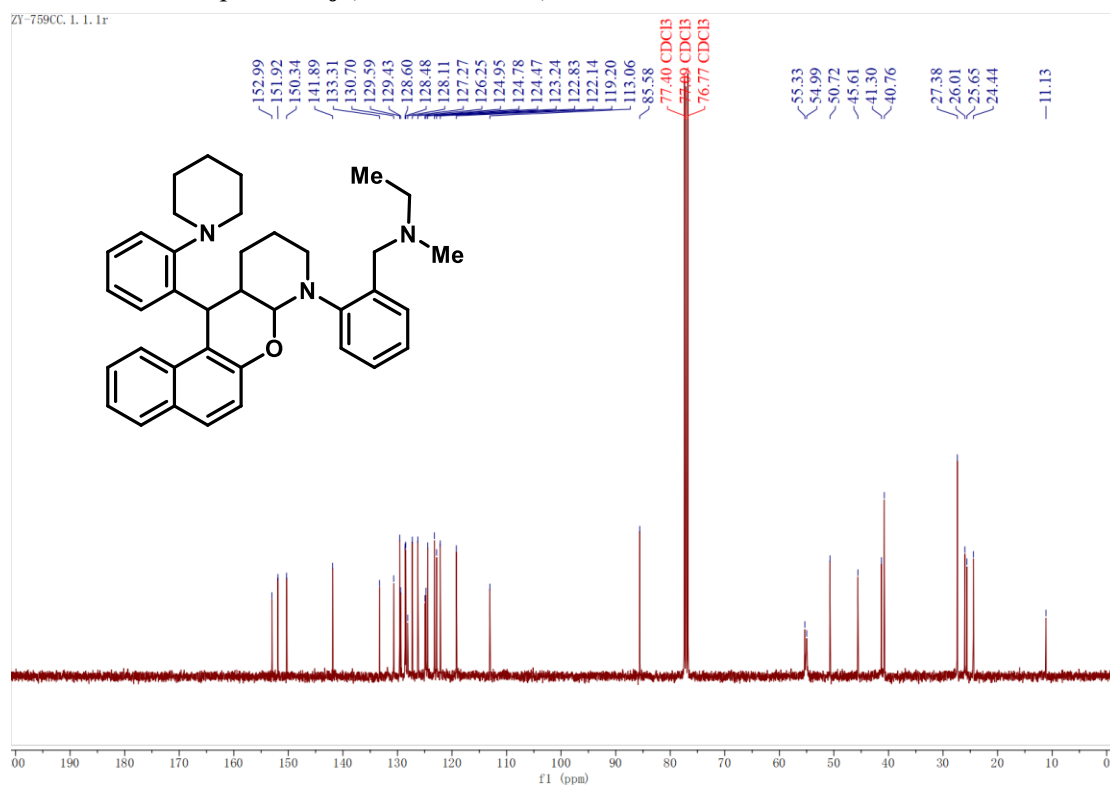

### <sup>1</sup>H NMR of Compound **4ak** (400 MHz, CDCl<sub>3</sub>)

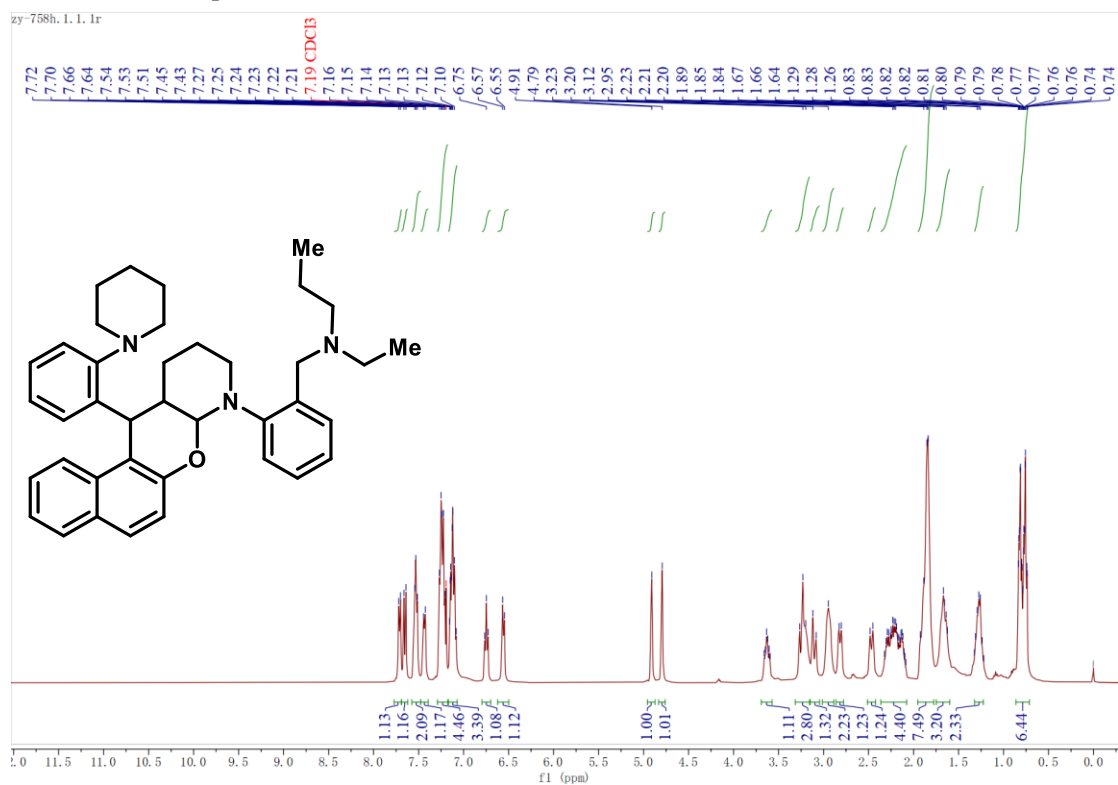

### <sup>13</sup>C NMR of Compound **4ak** (101 MHz, CDCl<sub>3</sub>)

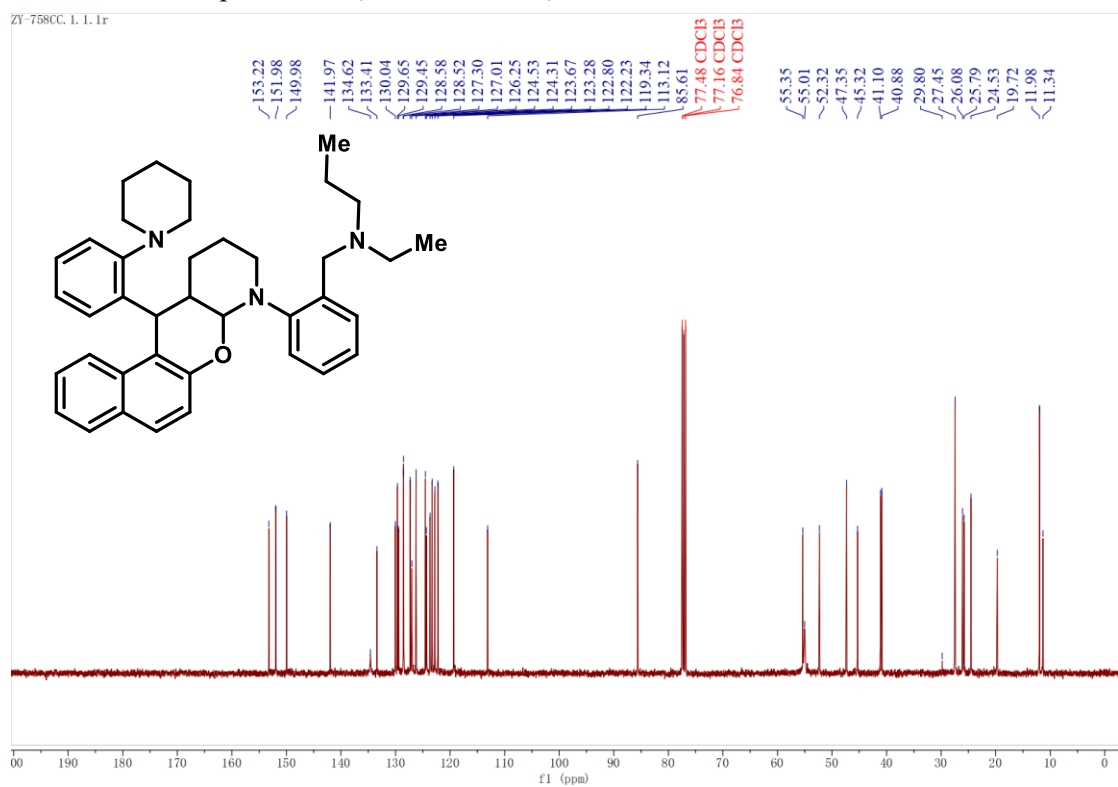

### <sup>1</sup>H NMR of Compound **4al** (400 MHz, CDCl<sub>3</sub>)

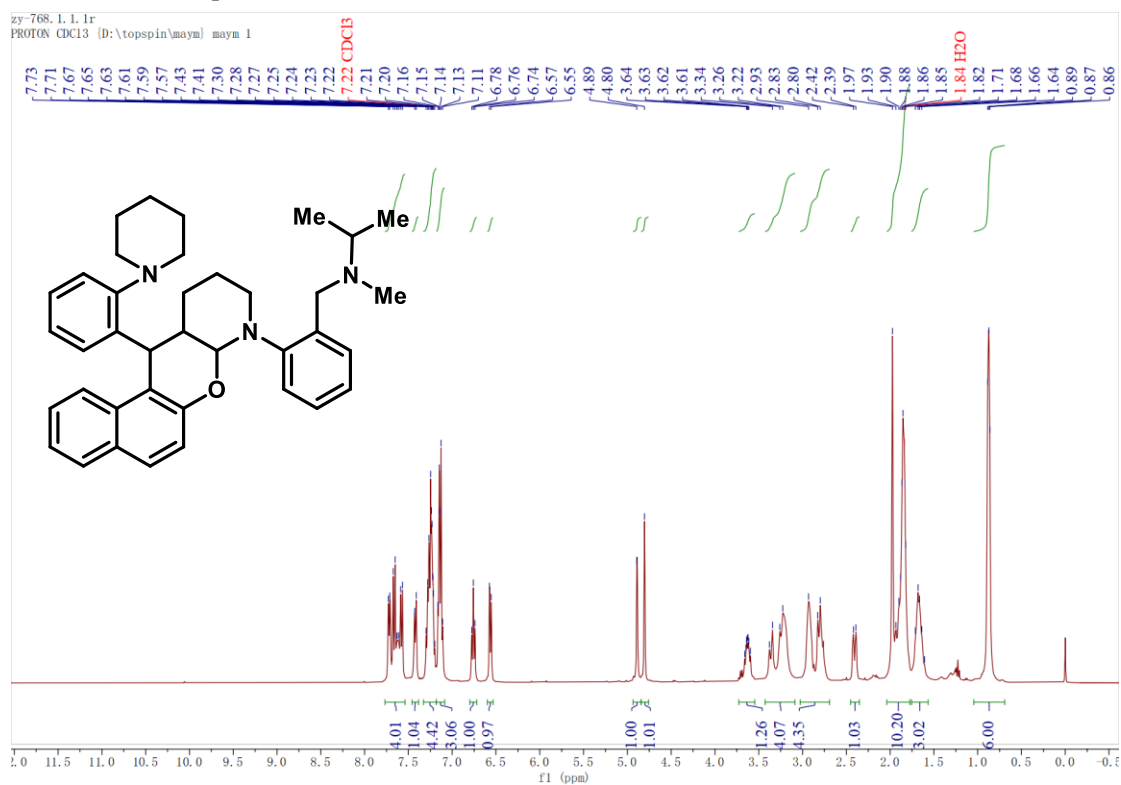

### <sup>13</sup>C NMR of Compound **4al** (101 MHz, CDCl<sub>3</sub>)

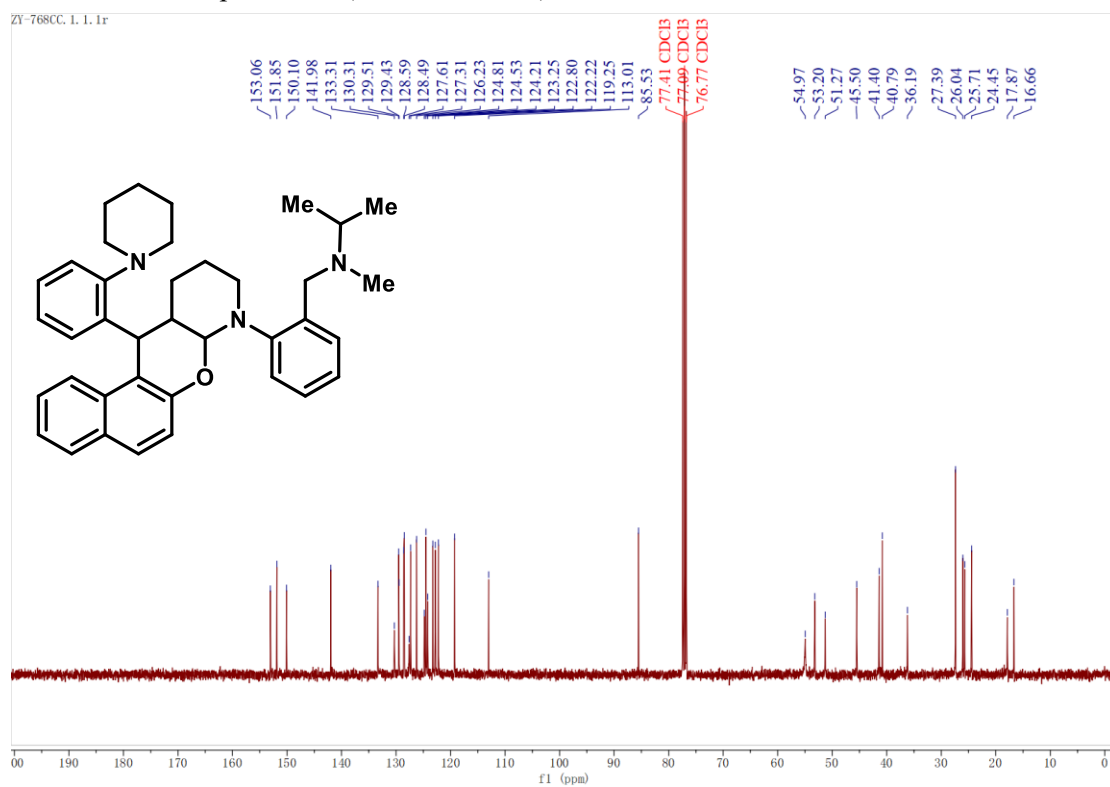

### <sup>1</sup>H NMR of Compound **4am** (400 MHz, CDCl<sub>3</sub>)

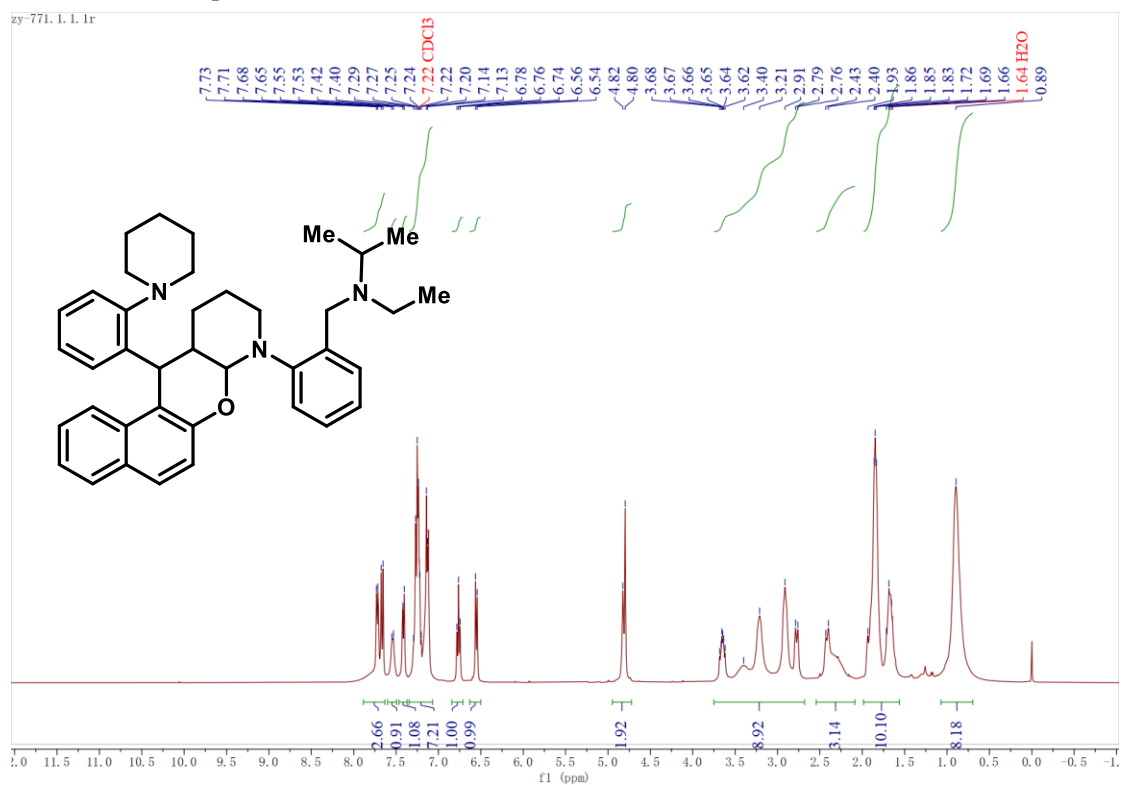

### <sup>13</sup>C NMR of Compound **4am** (101 MHz, CDCl<sub>3</sub>)

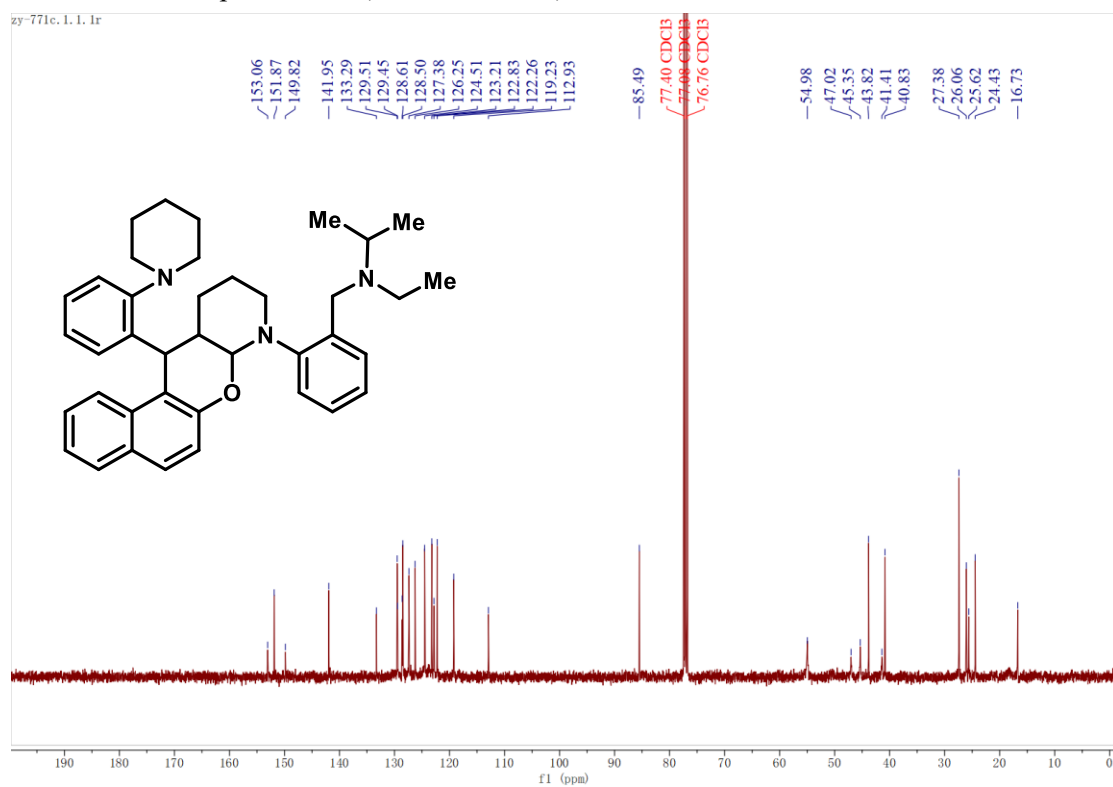

### <sup>1</sup>H NMR of Compound **4an** (400 MHz, CDCl<sub>3</sub>)

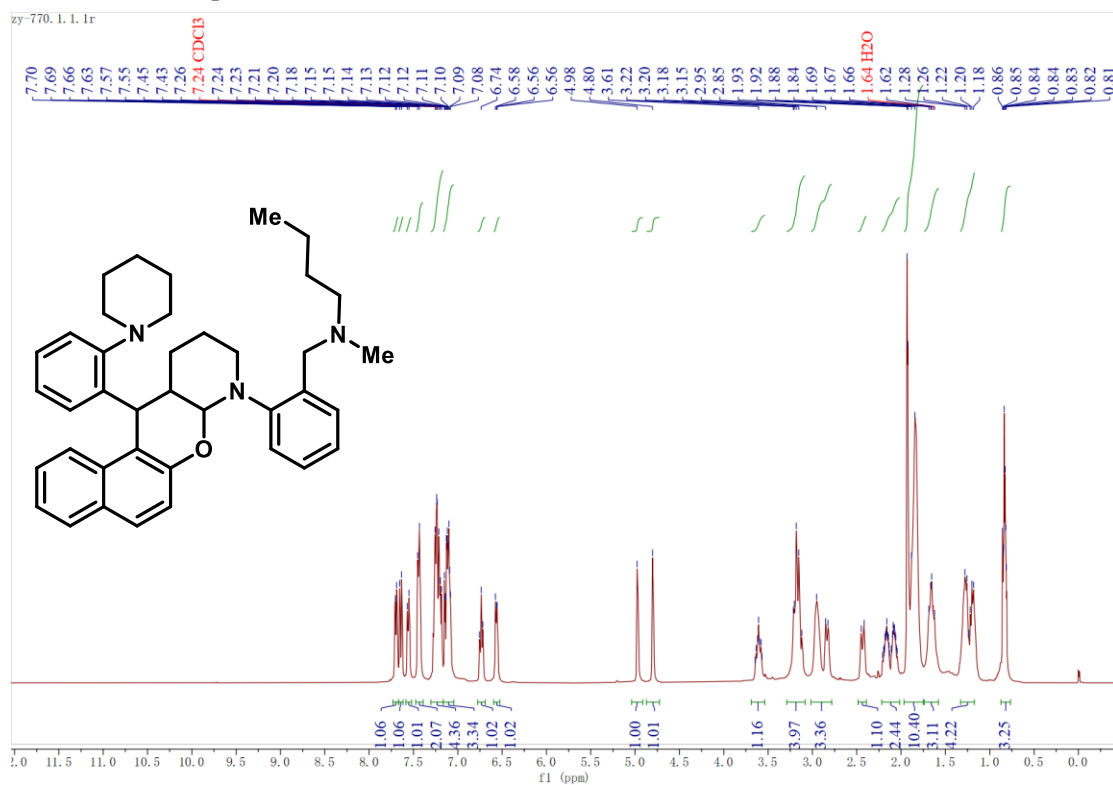

### <sup>13</sup>C NMR of Compound **4an** (101 MHz, CDCl<sub>3</sub>)

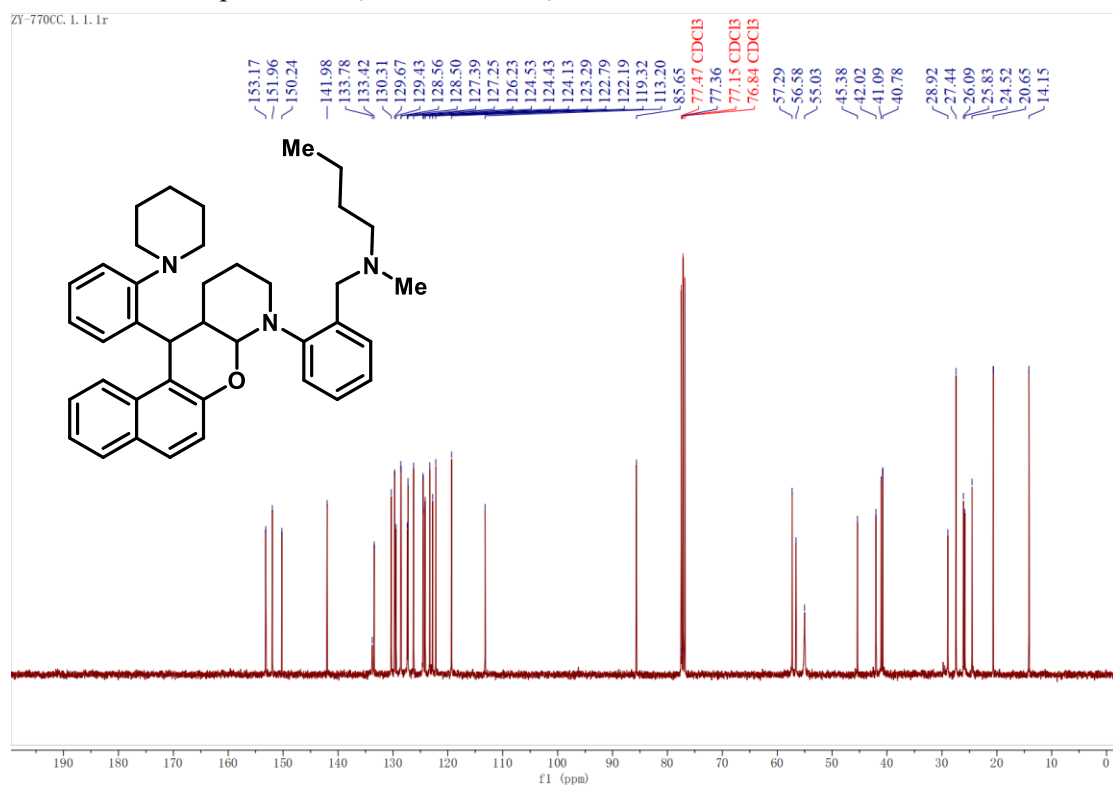



### <sup>1</sup>H NMR of Compound **4ao** (400 MHz, CDCl<sub>3</sub>)

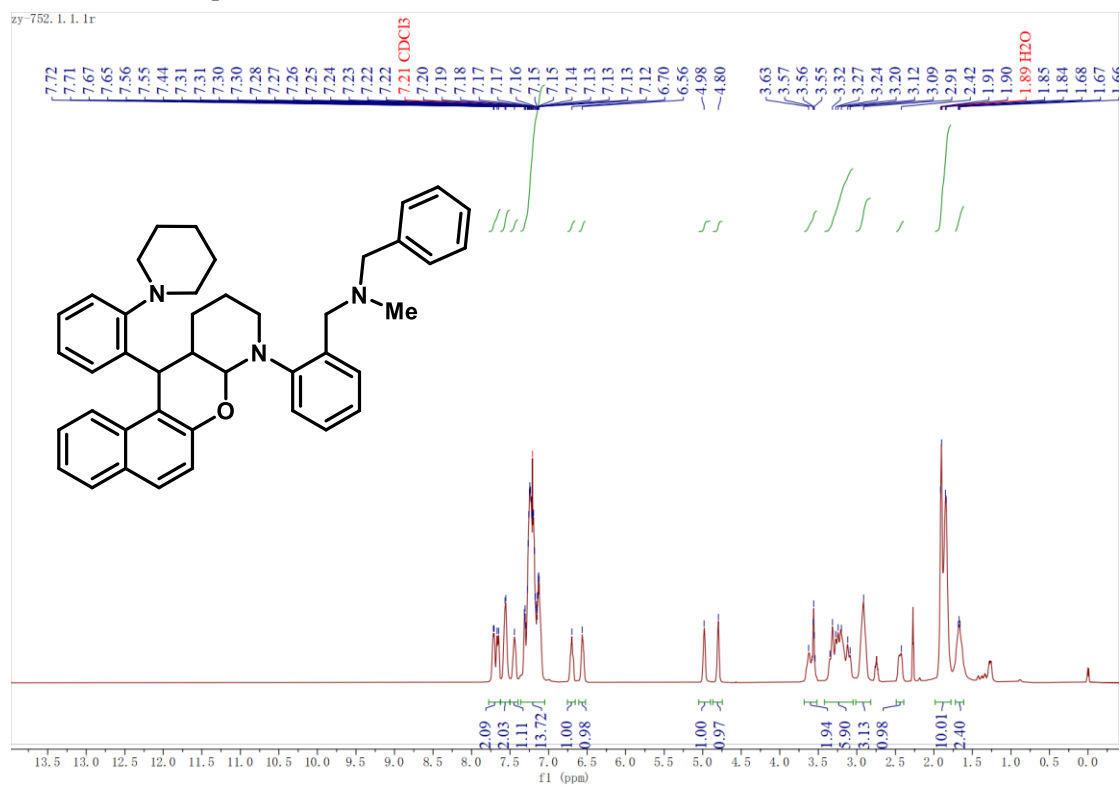

### <sup>13</sup>C NMR of Compound **4ao** (101 MHz, CDCl<sub>3</sub>)

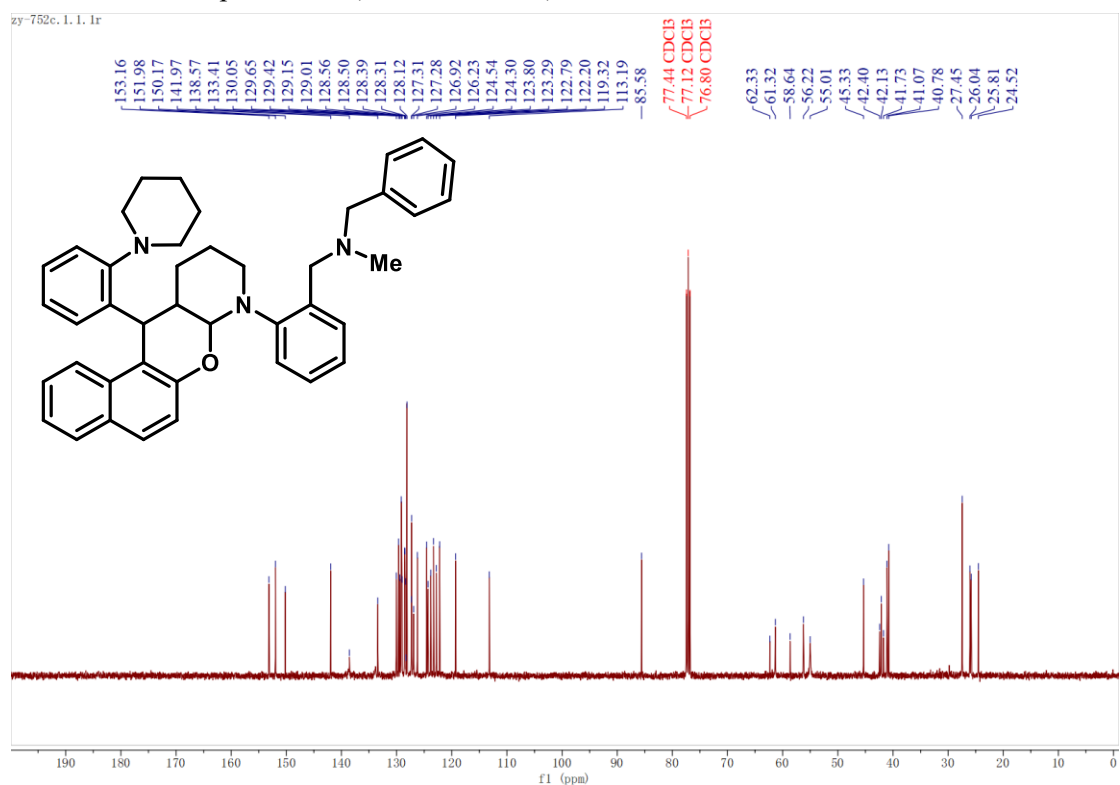

Supplement: d4cc02858a1.pdf [file d4cc02858a1.pdf]
